# Supplementary material for: Synthesis of 2,6-disubstituted pyridin-3-yl C-2′-deoxyribonucleosides through chemoselective transformations of bromo-chloropyridine C-nucleosides
Source: Royal Society of Chemistry journal article supplement (doi:10.1039/c3ob40774h), 2013-01-01

Electronic supporting information

**Synthesis of 2,6-Disubstituted Pyridine-3-yl C-2'-  
Deoxyribonucleosides through Chemoselective Transformations  
of Bromo-chloropyridine C-Nucleosides**

Tomáš Kubelka,<sup>a</sup> Lenka Slavětínská,<sup>a</sup> Václav Eigner<sup>a</sup> and Michal Hocek<sup>\*a,b</sup>

Copies of NMR spectra

NMR Spectra of **2**

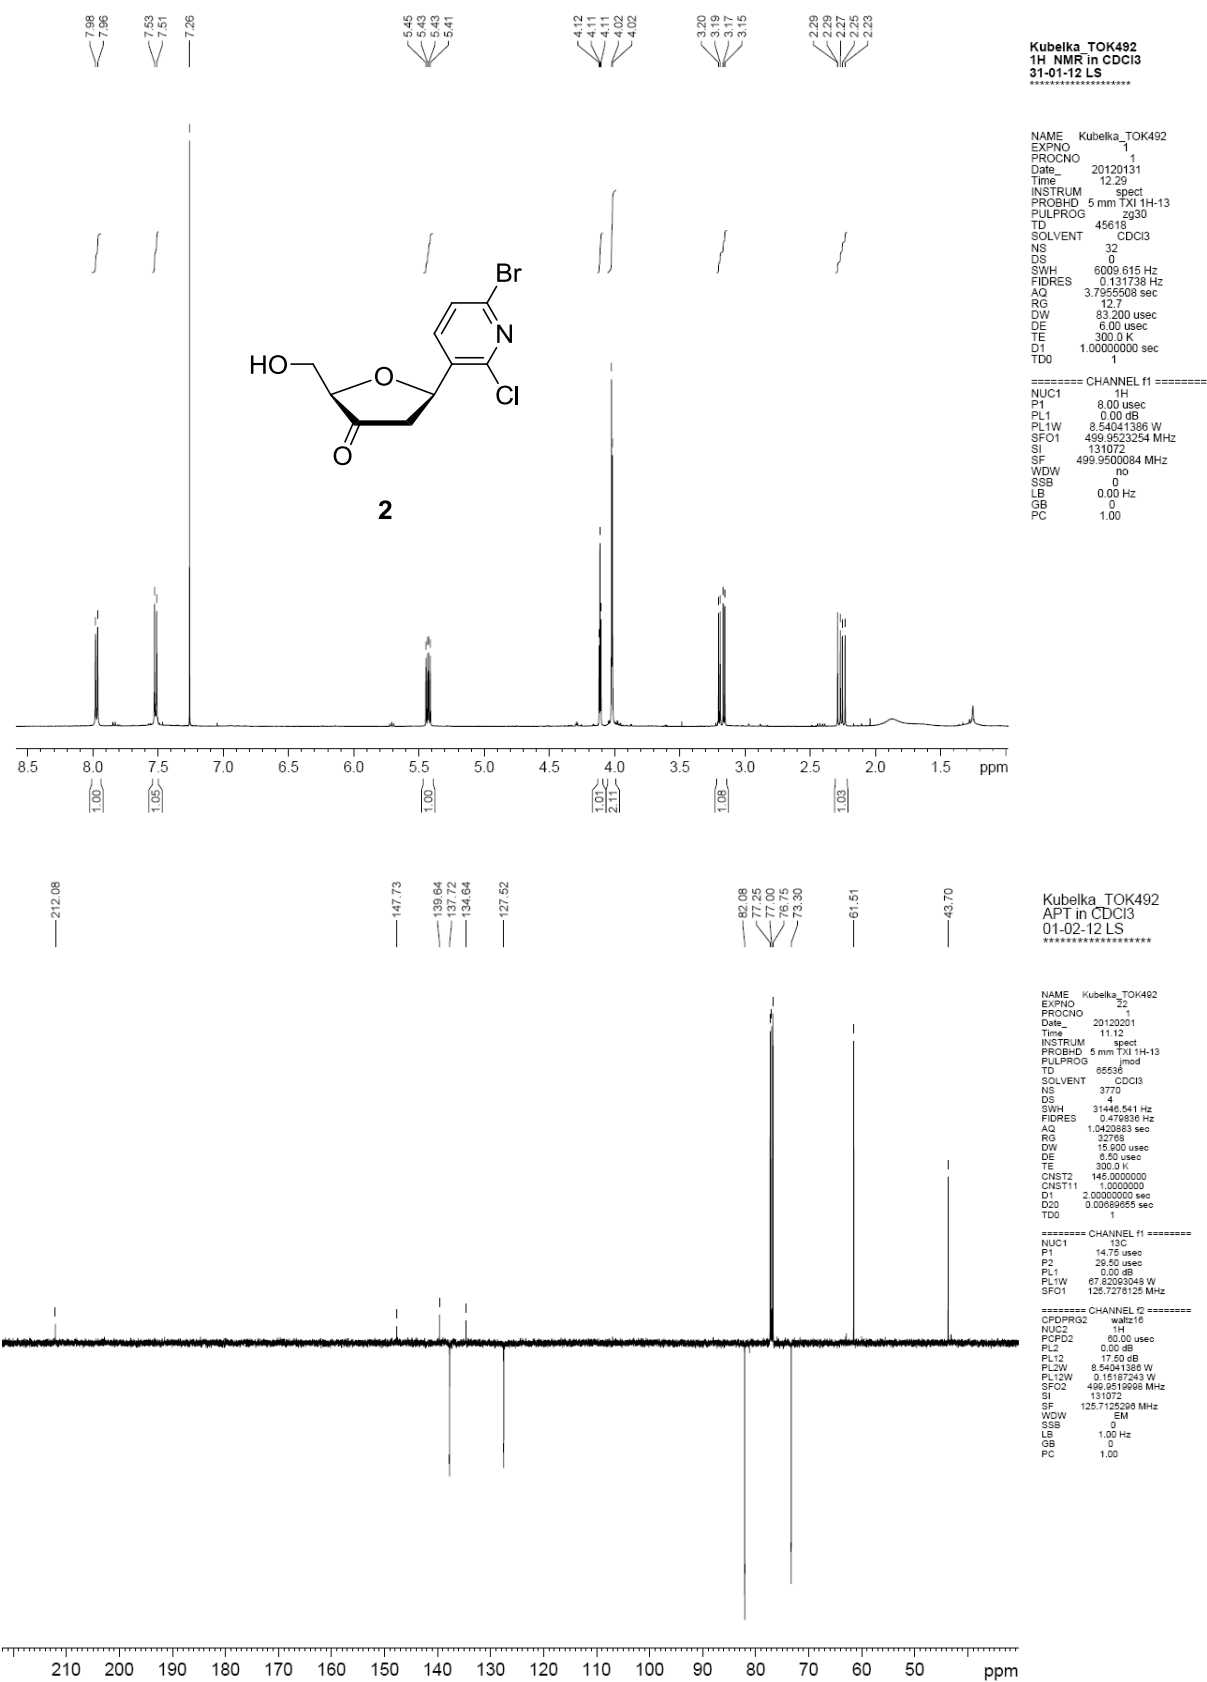

NMR Spectra of 3

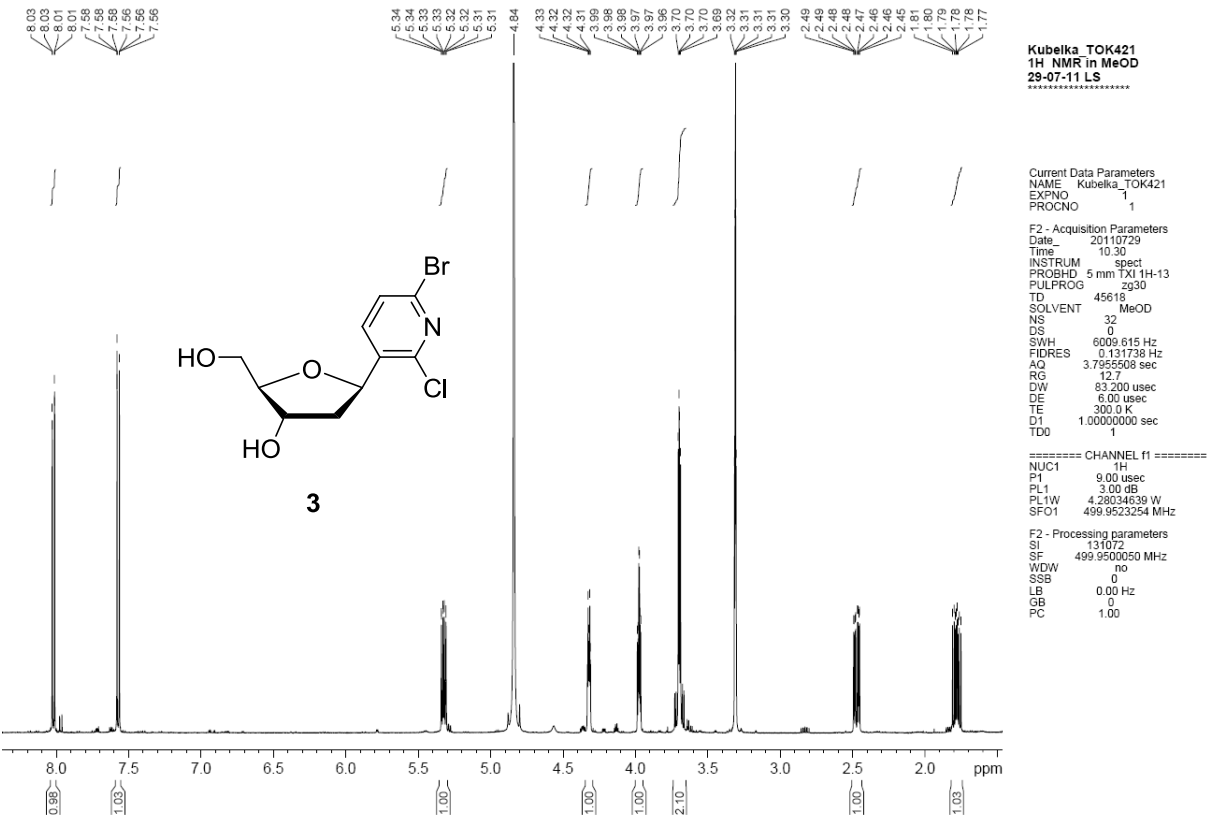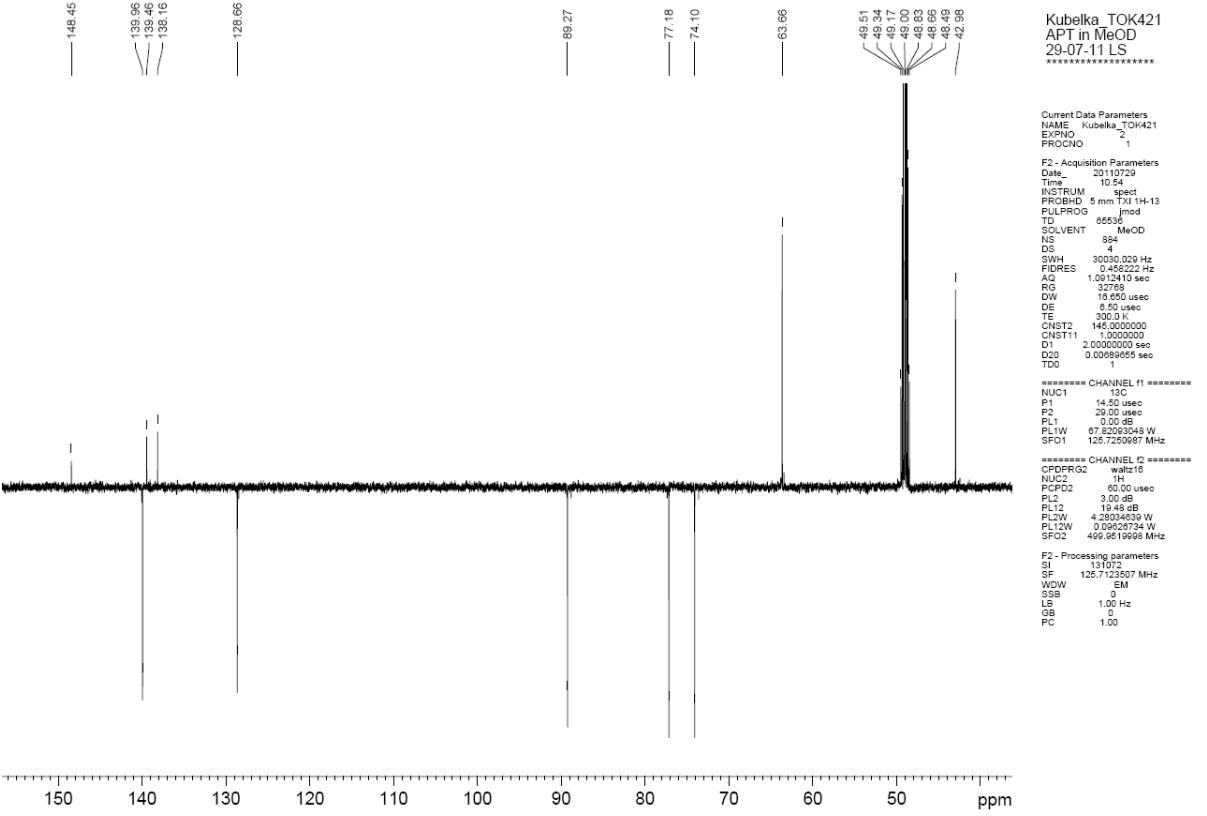



# NMR Spectra of **5**

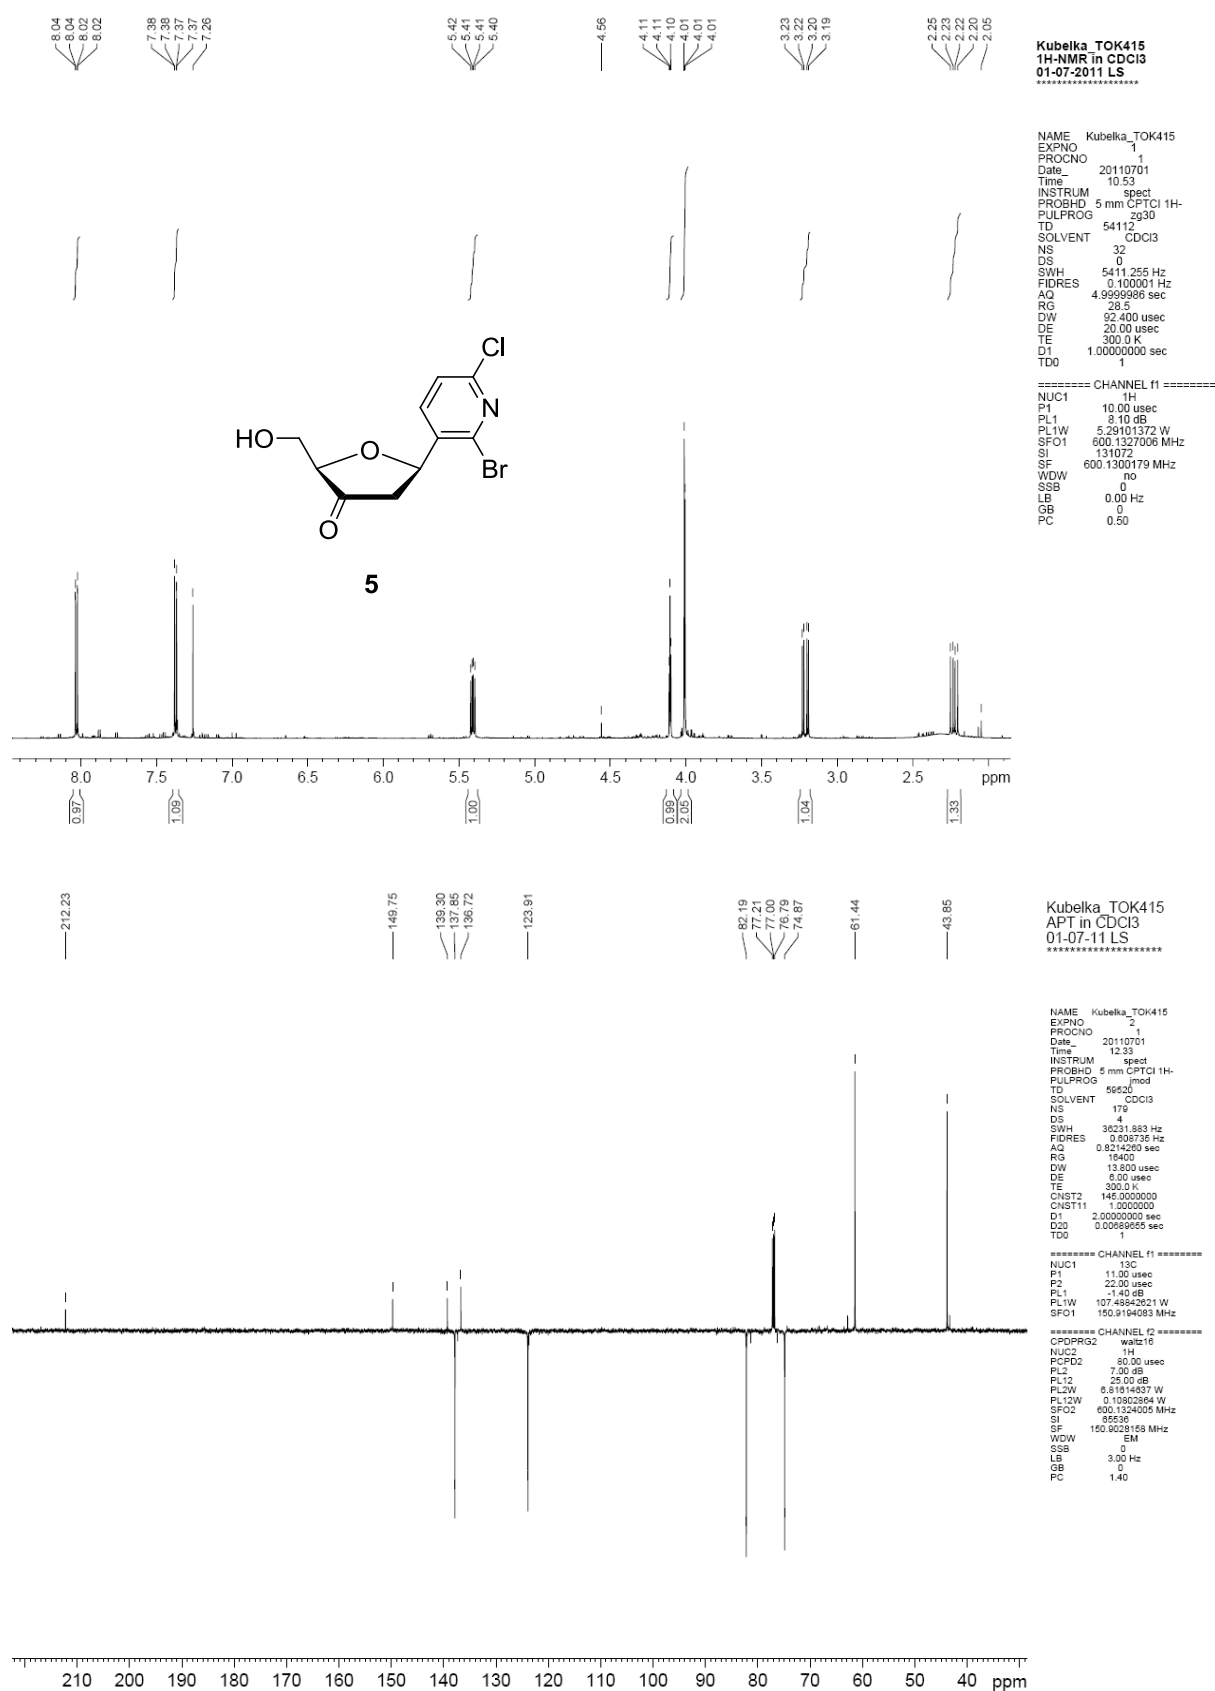

NMR Spectra of 6

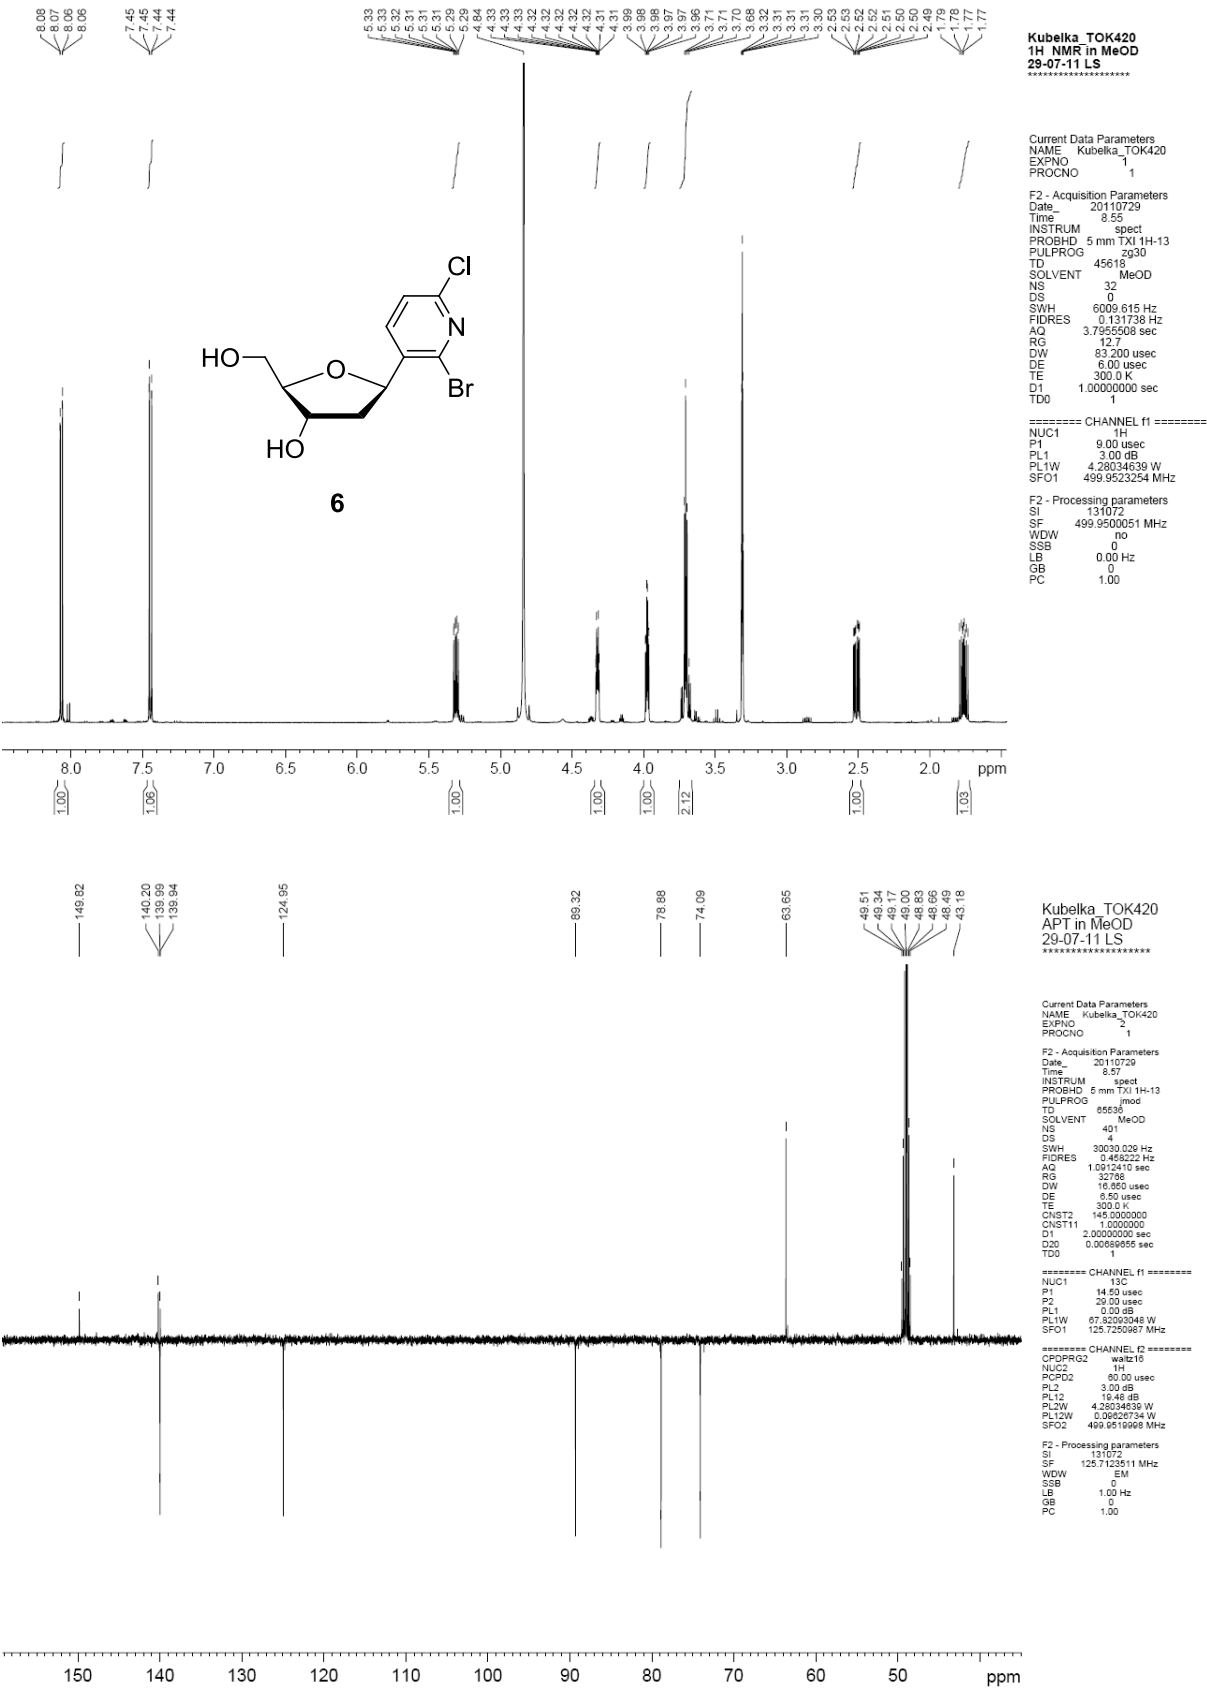

NMR Spectra of **7**

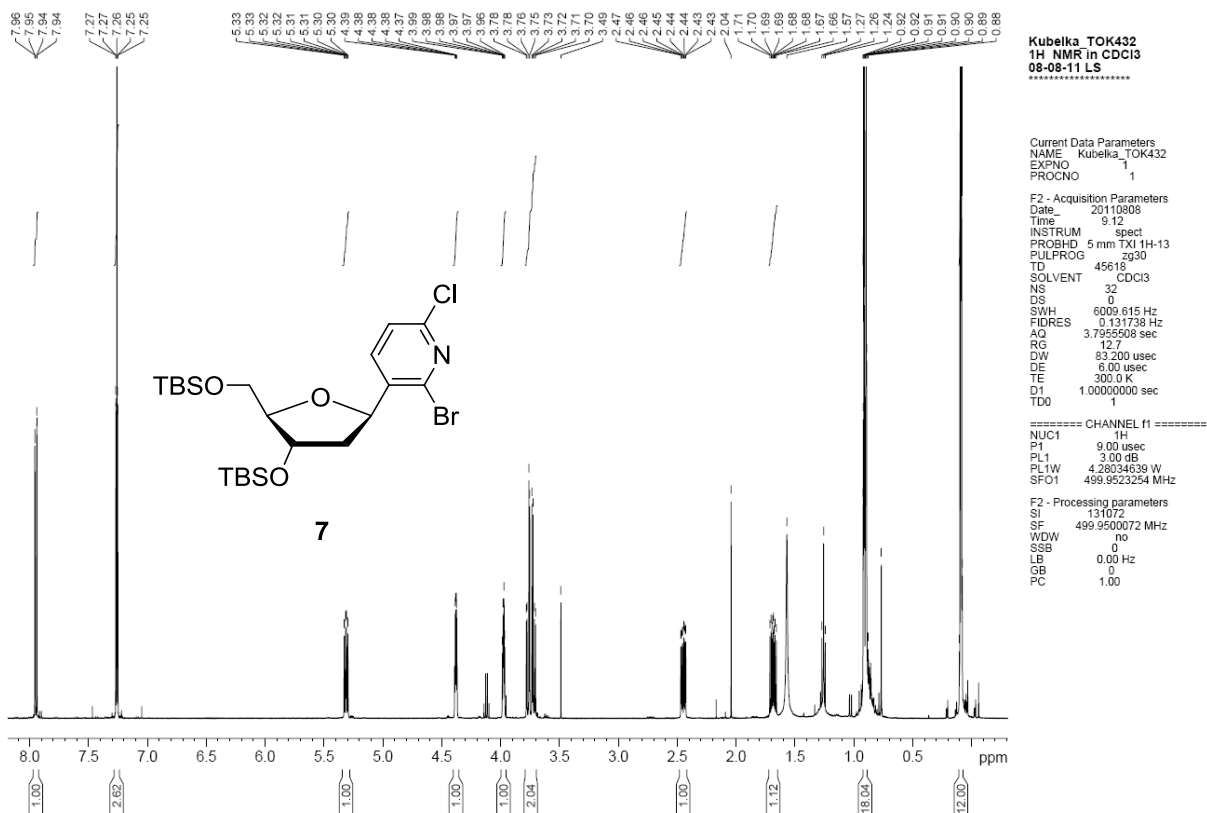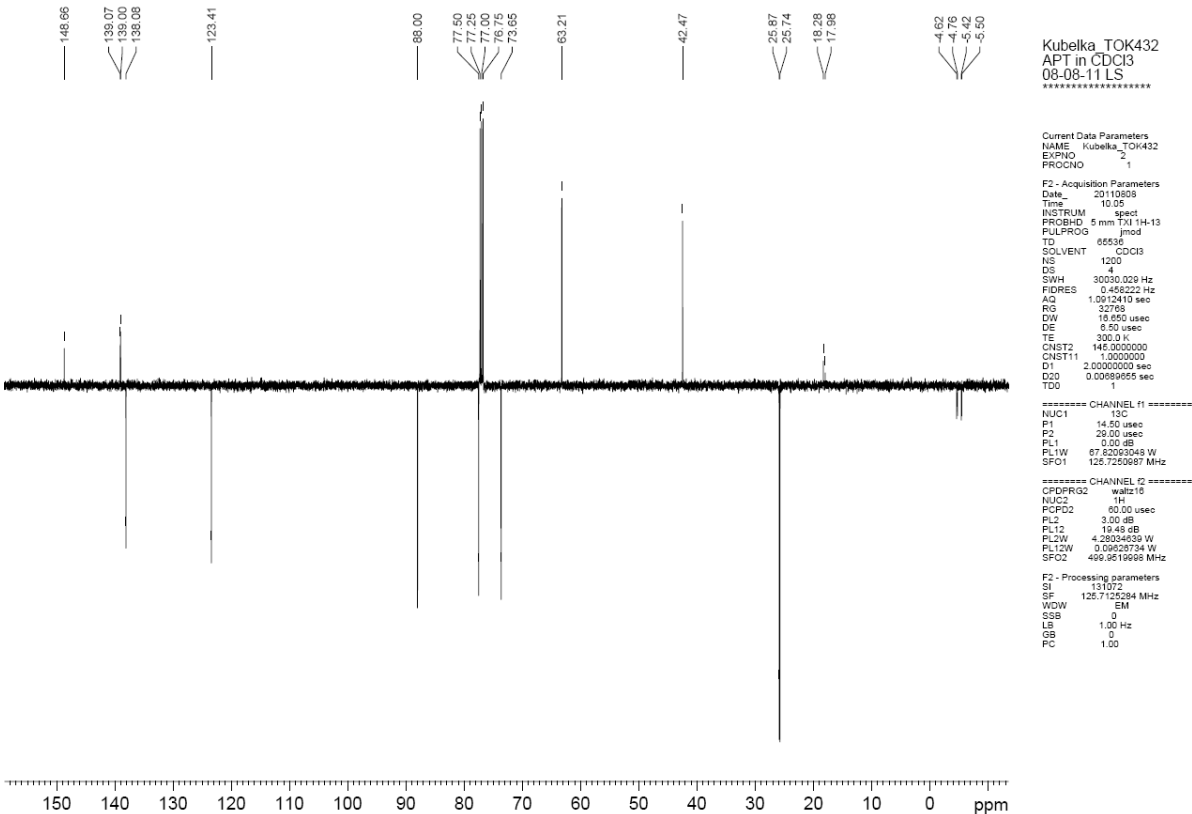

NMR Spectra of **8a**

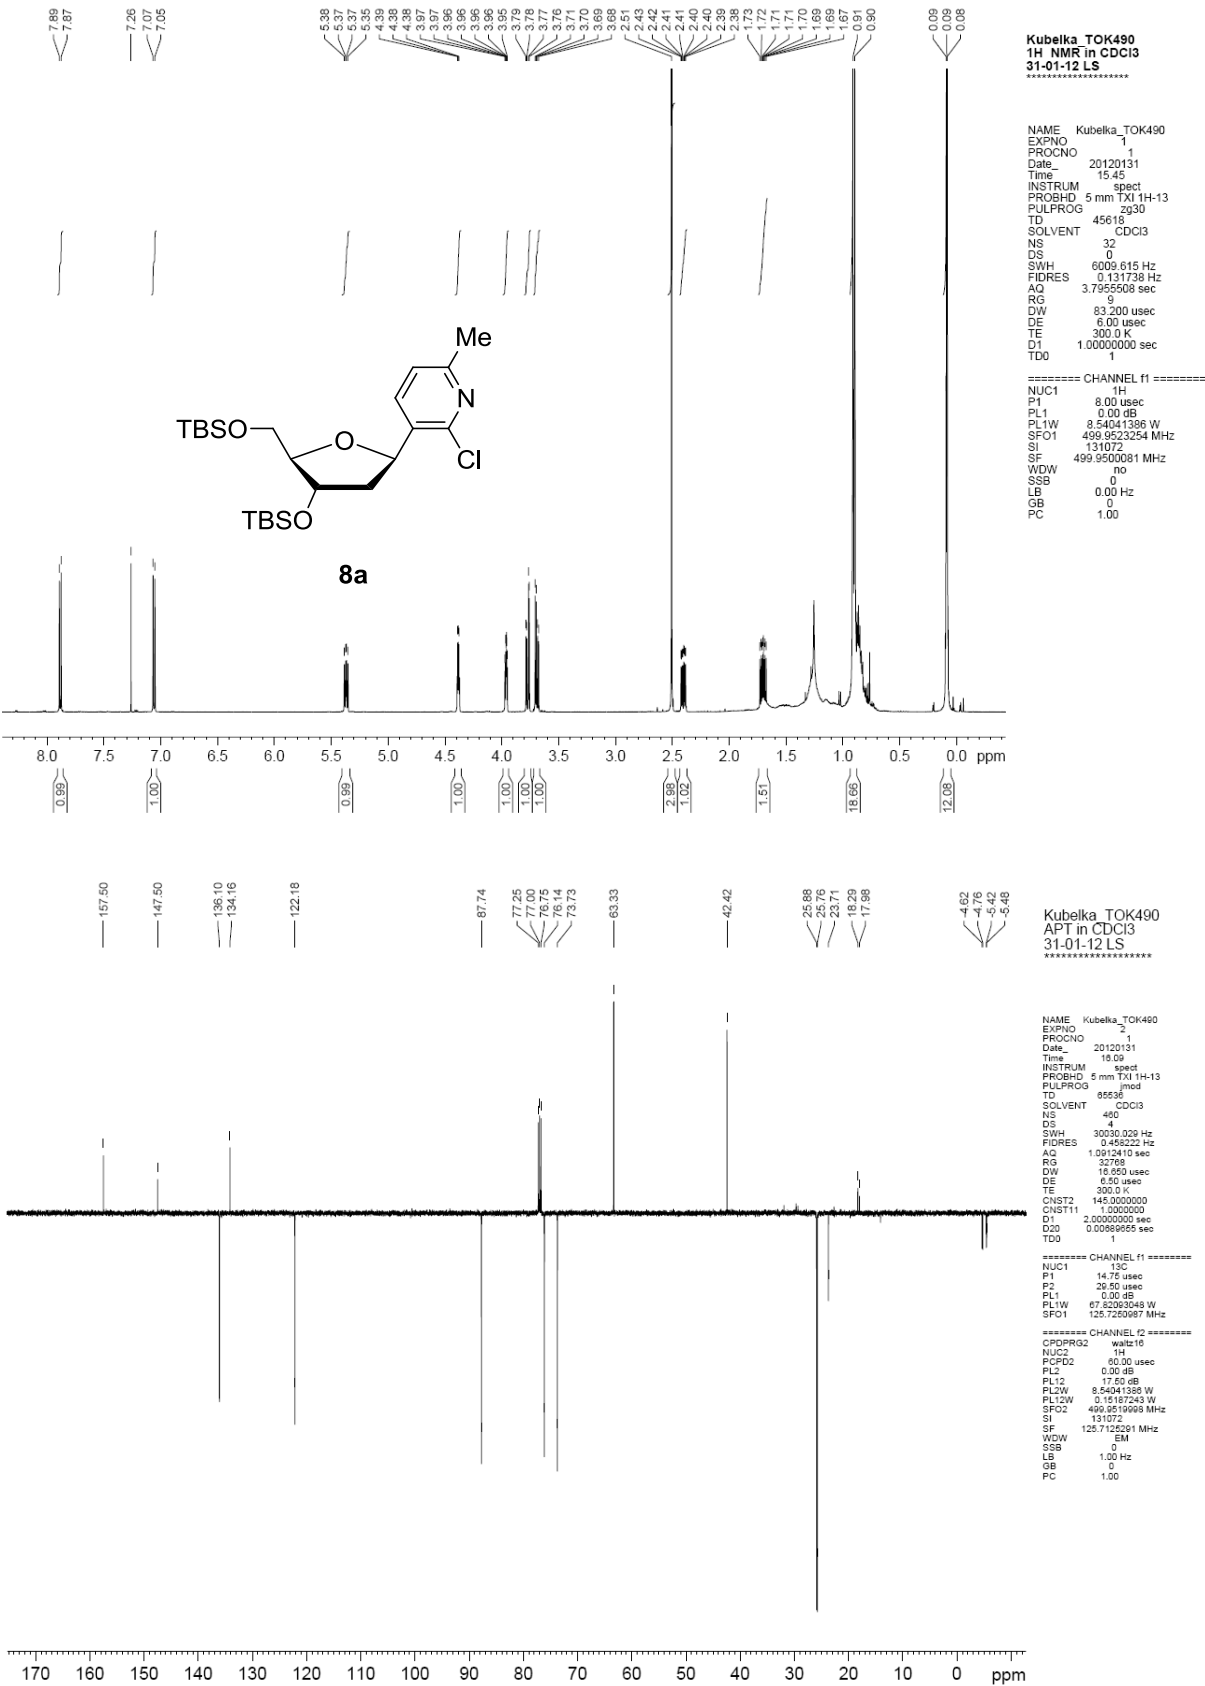



NMR Spectra of **8b**

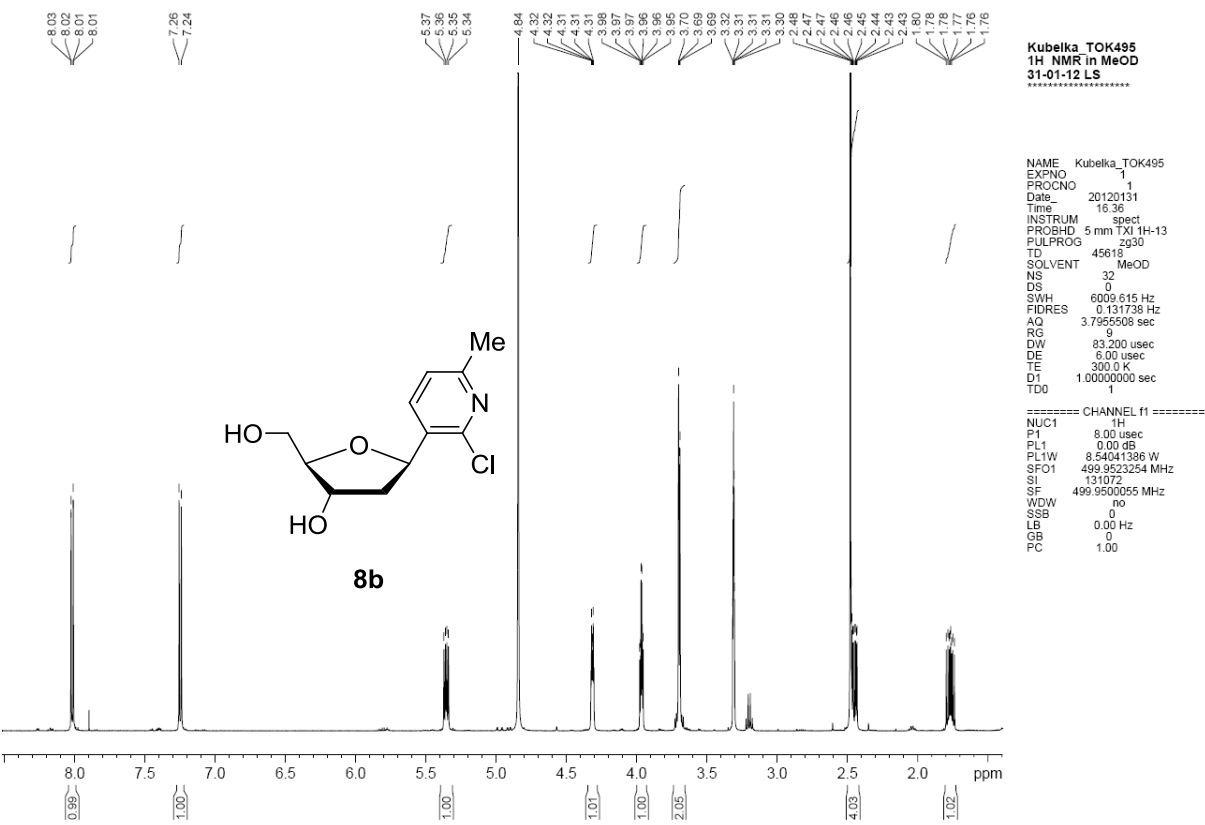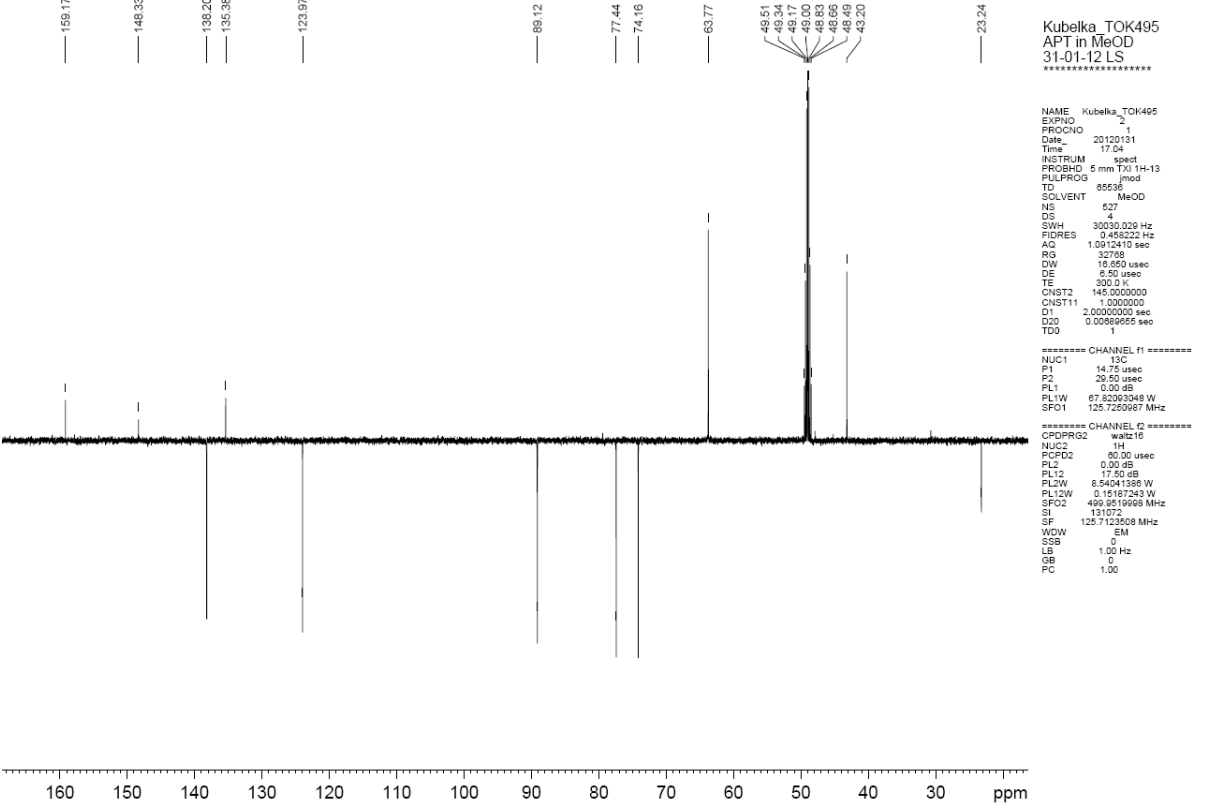

NMR Spectra of **9a**

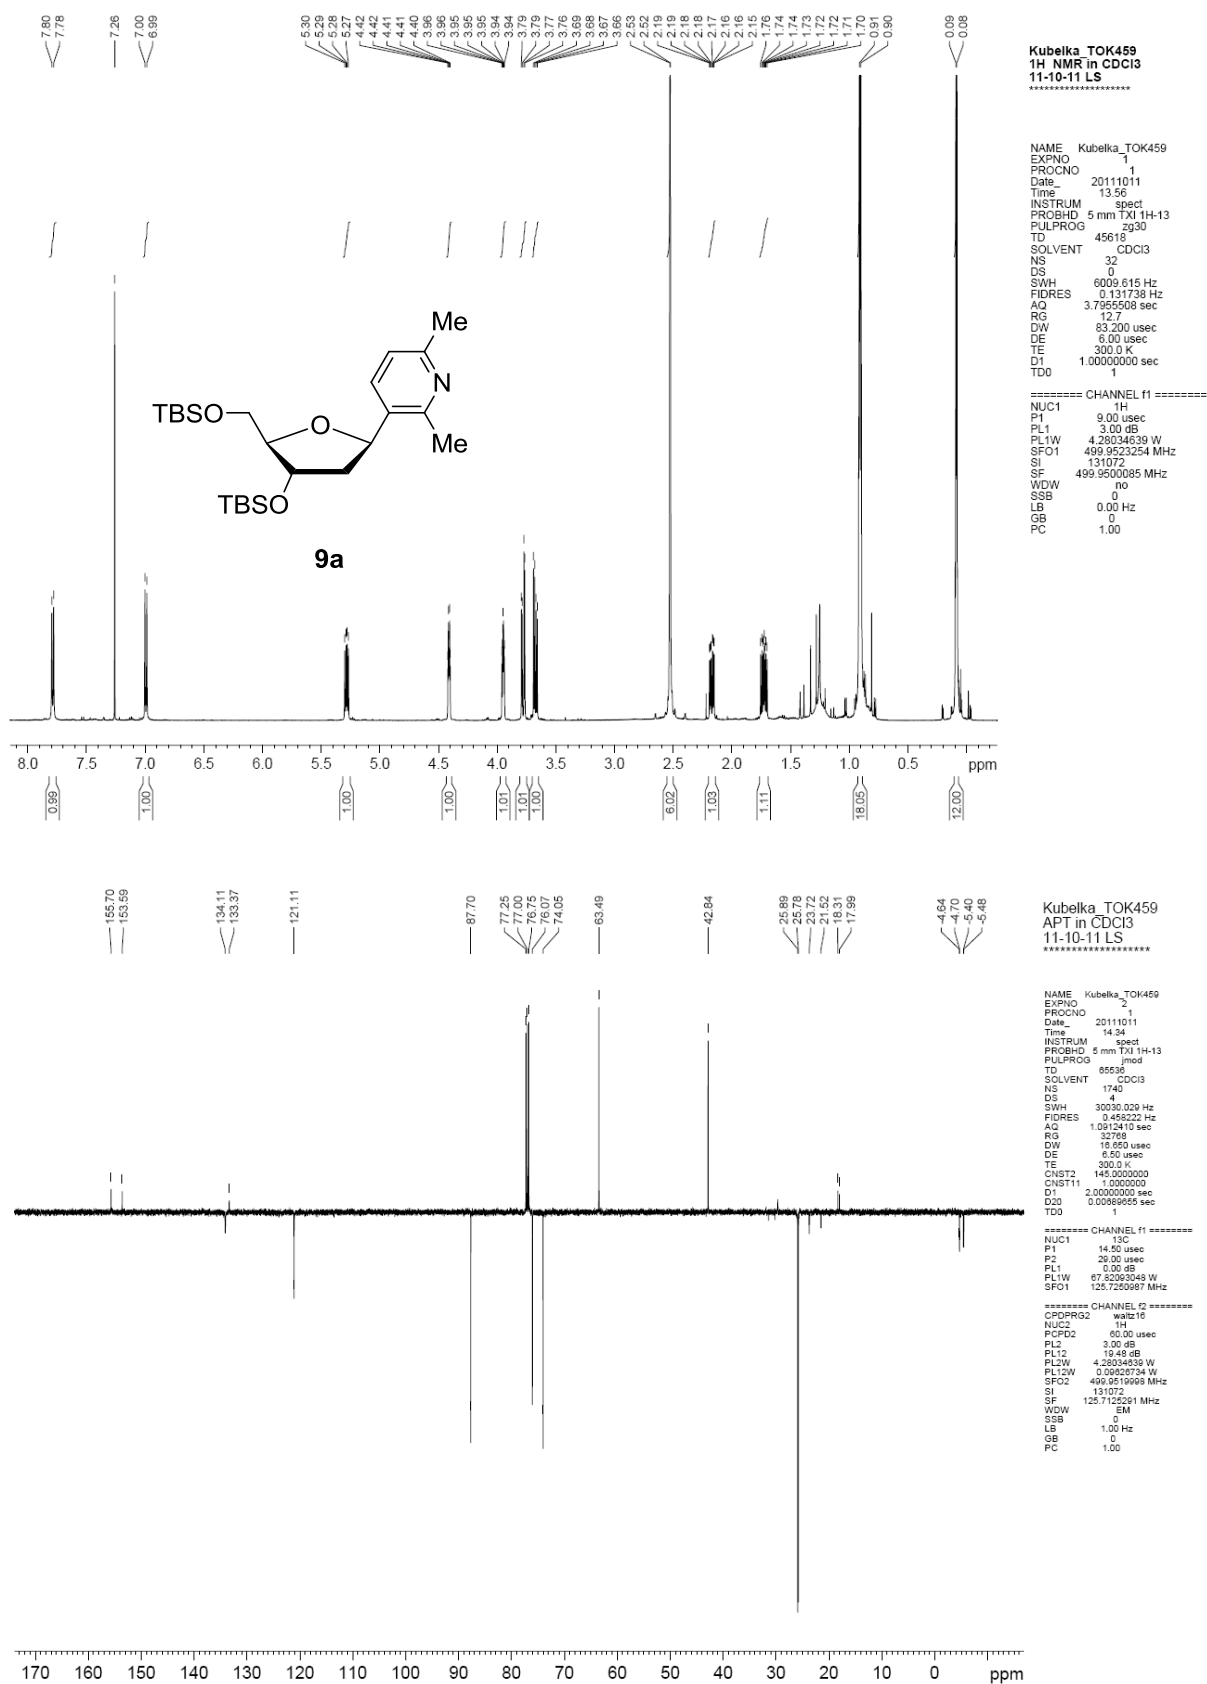



NMR Spectra of 10a

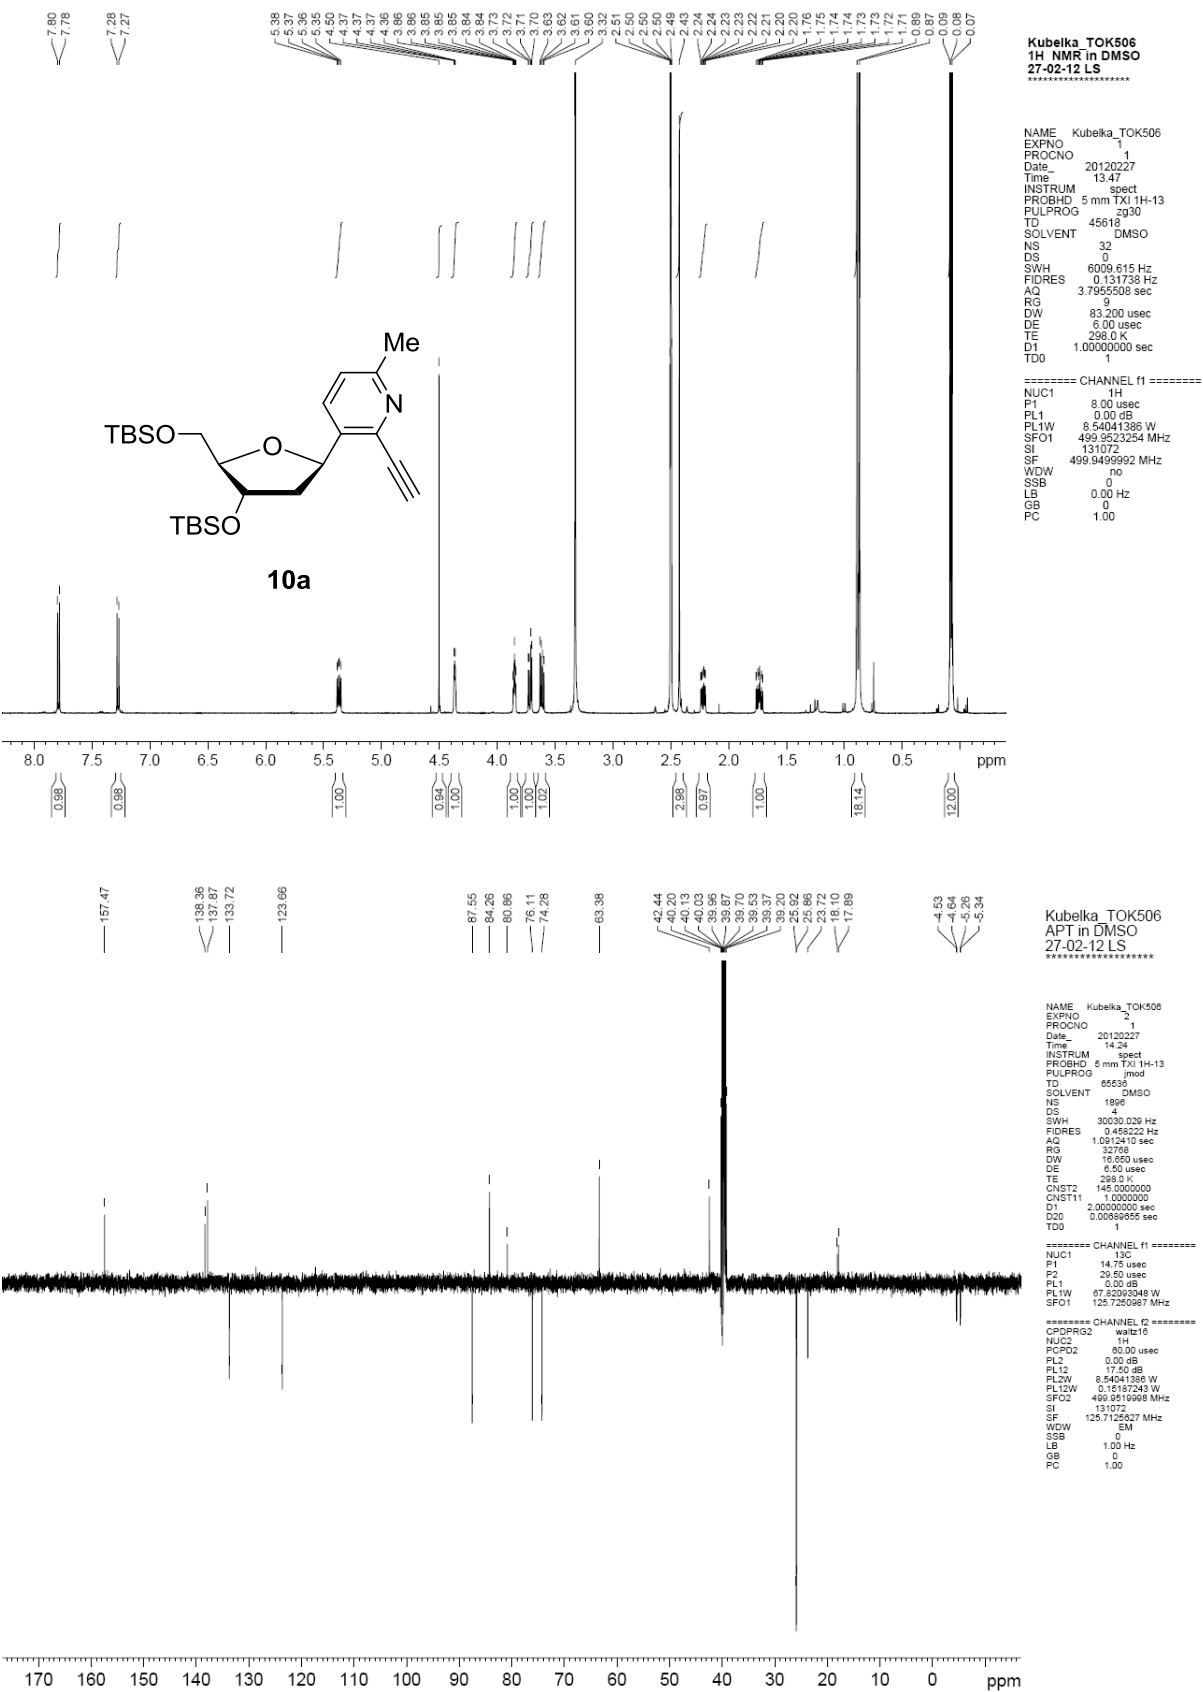

NMR Spectra of 10b

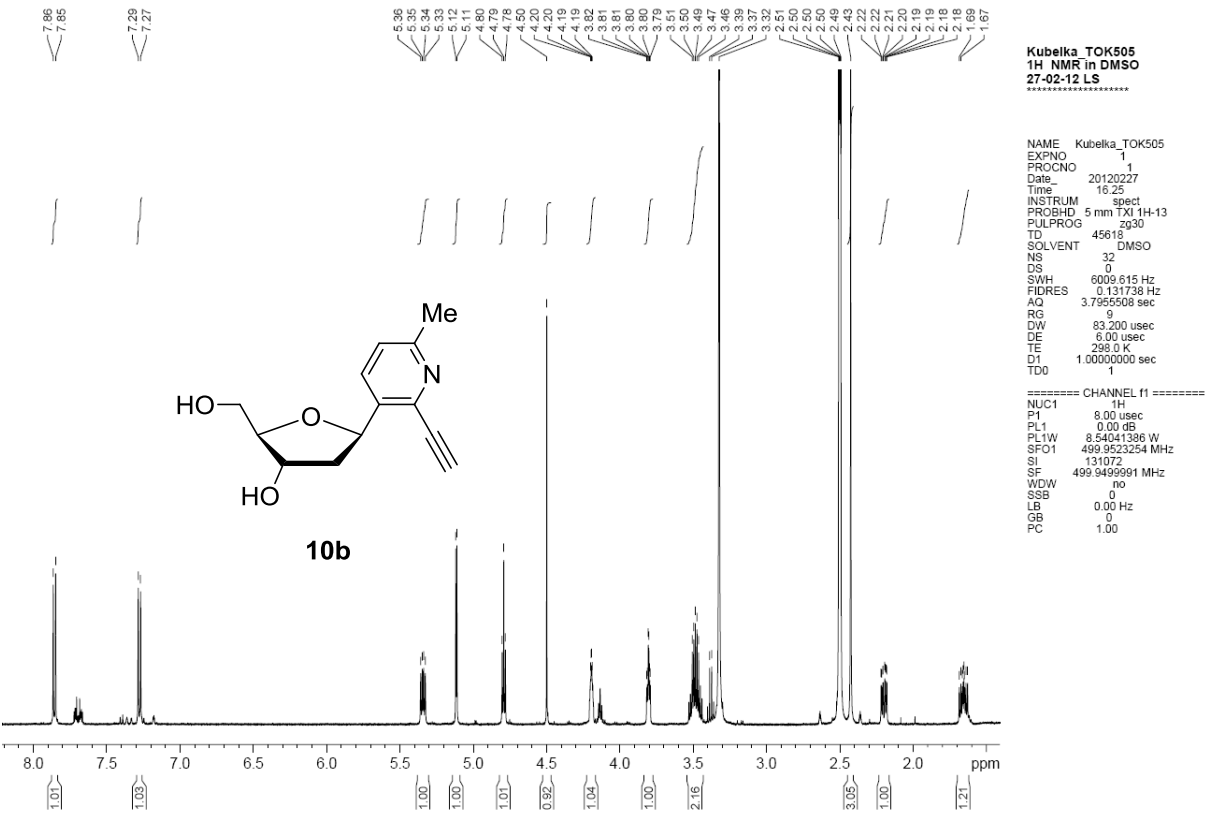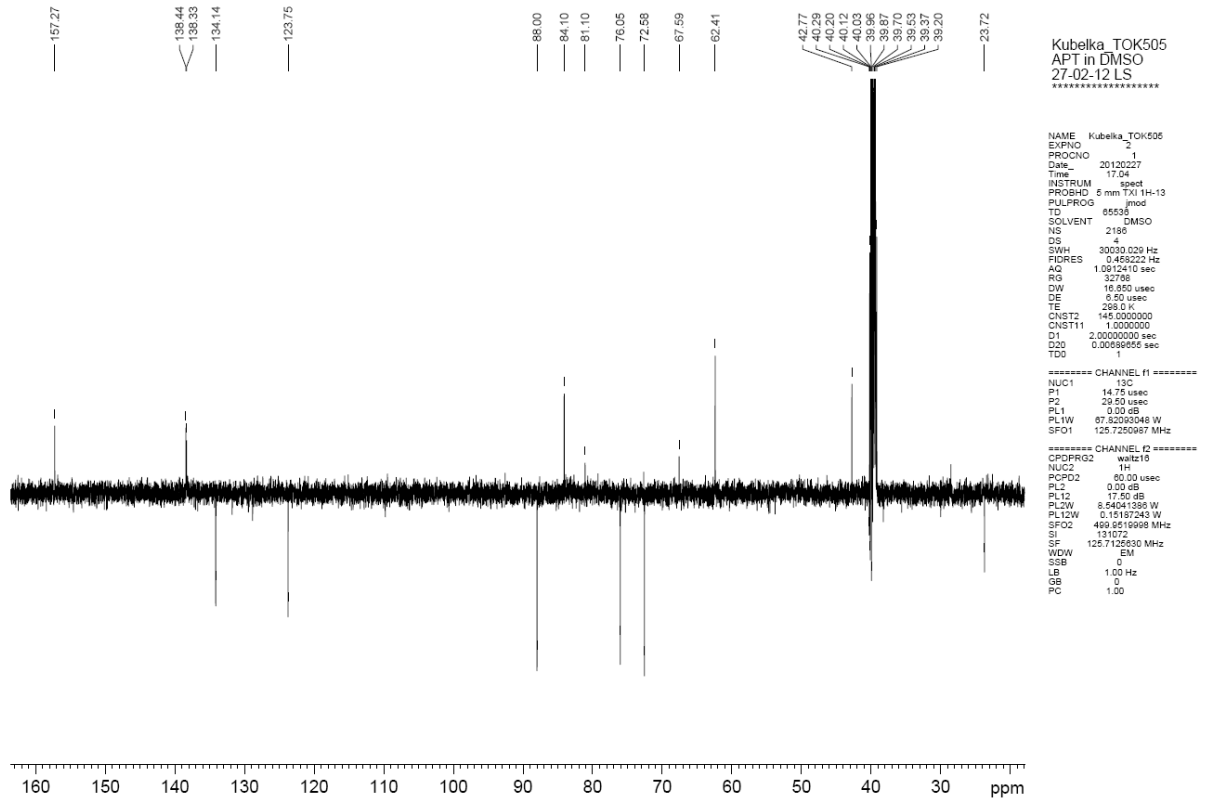

# NMR Spectra of 11a

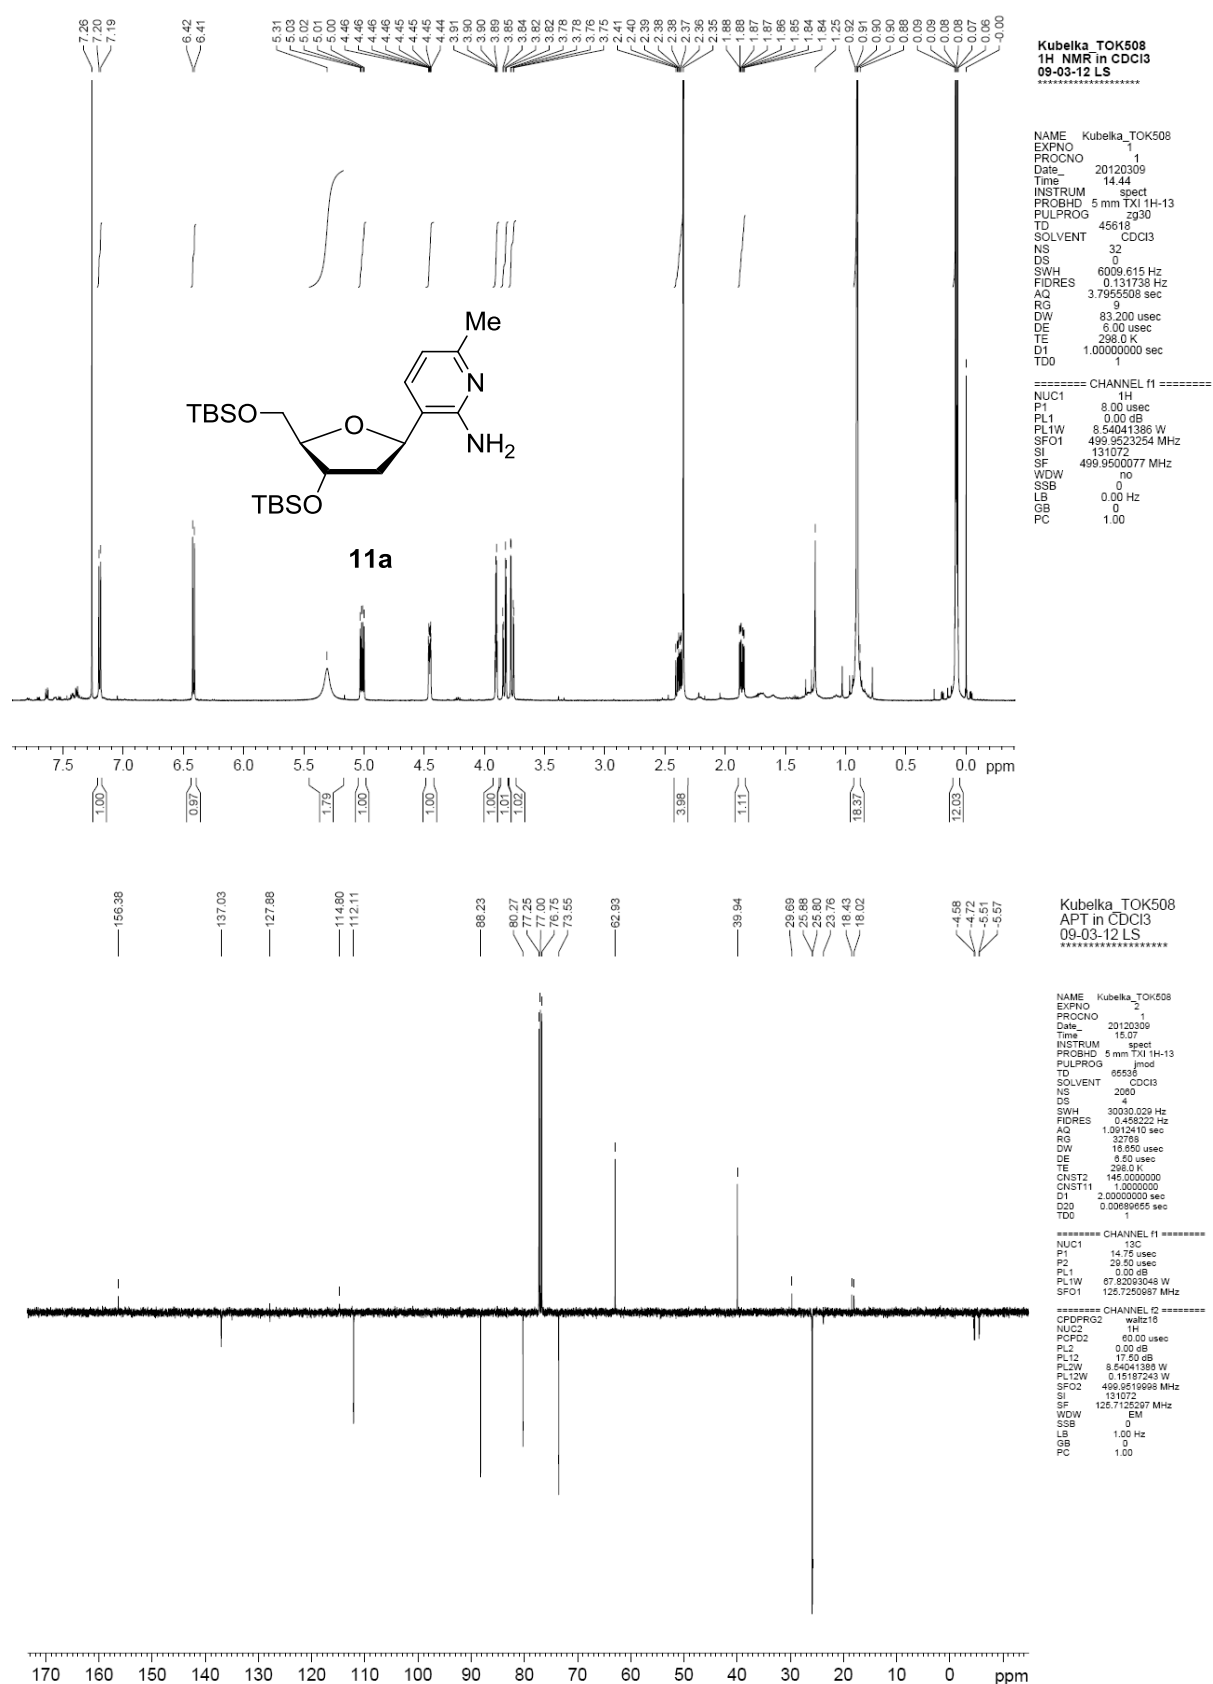

# NMR Spectra of **11b**

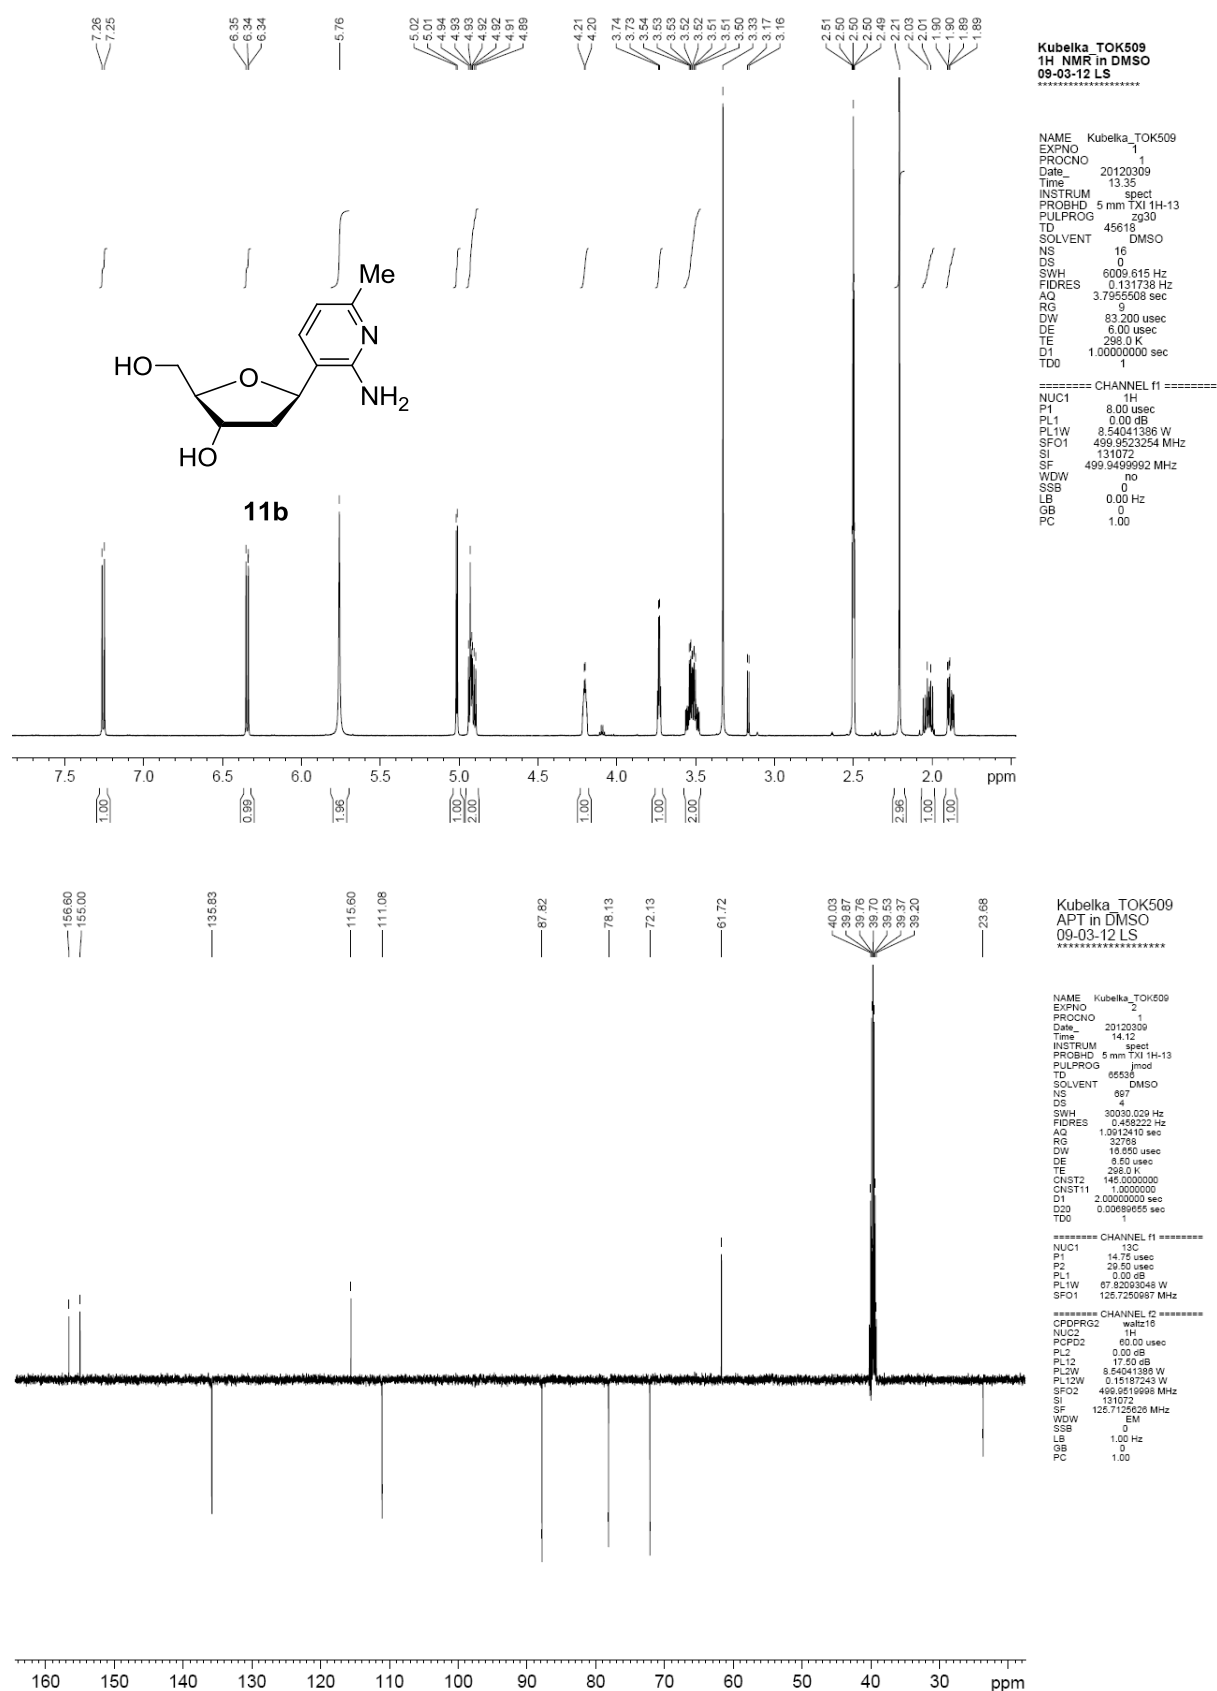

NMR Spectra of **12**

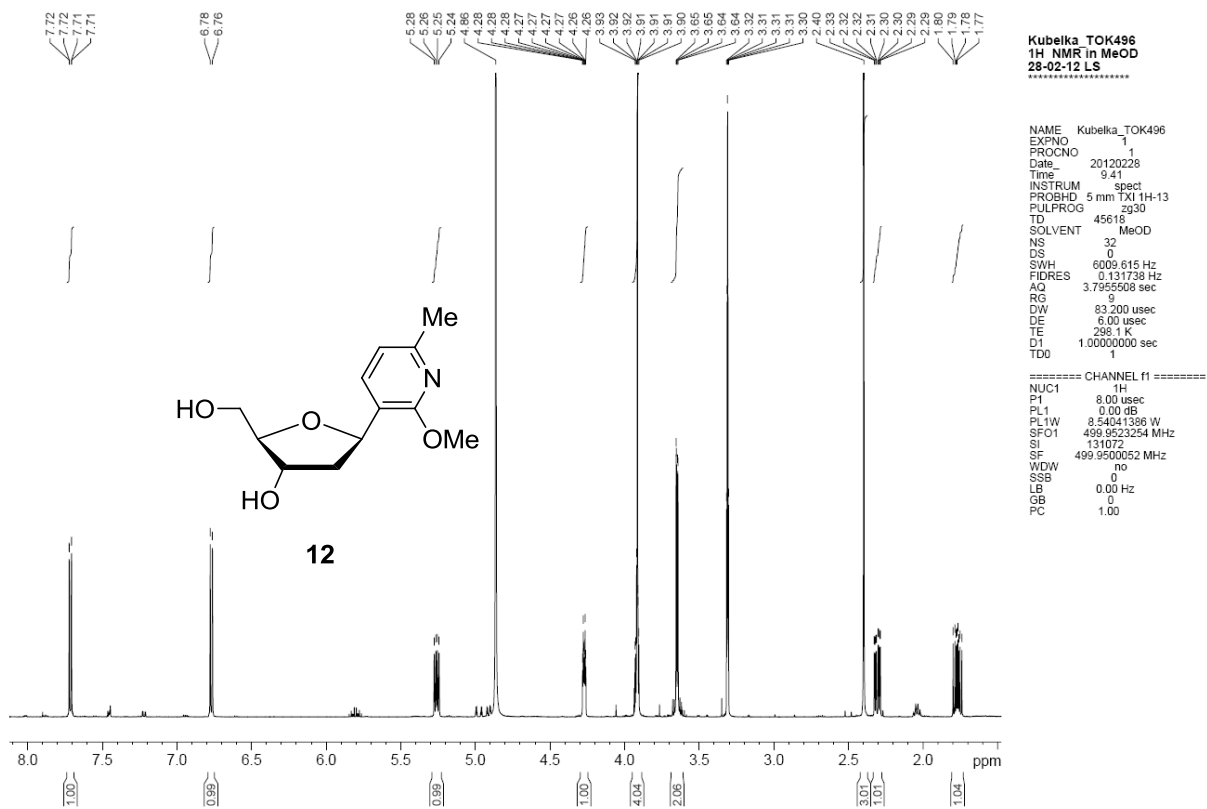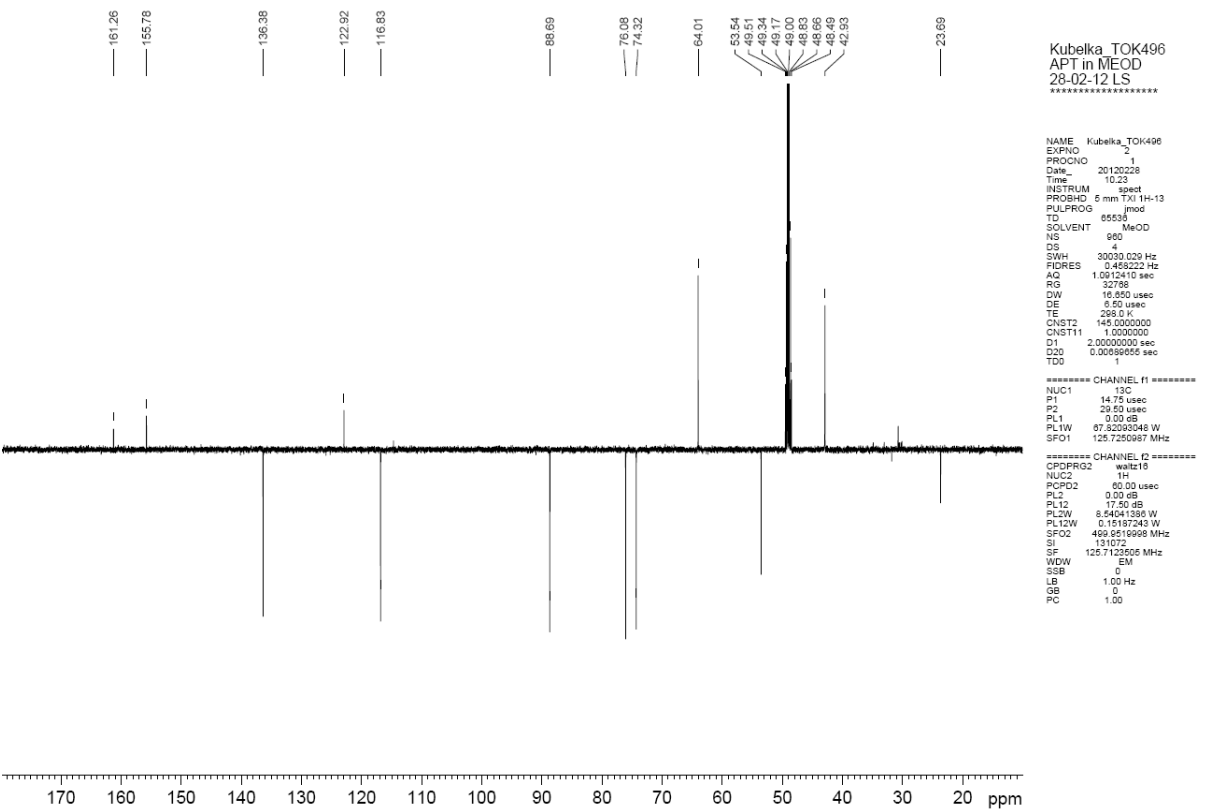



NMR Spectra of **13a**

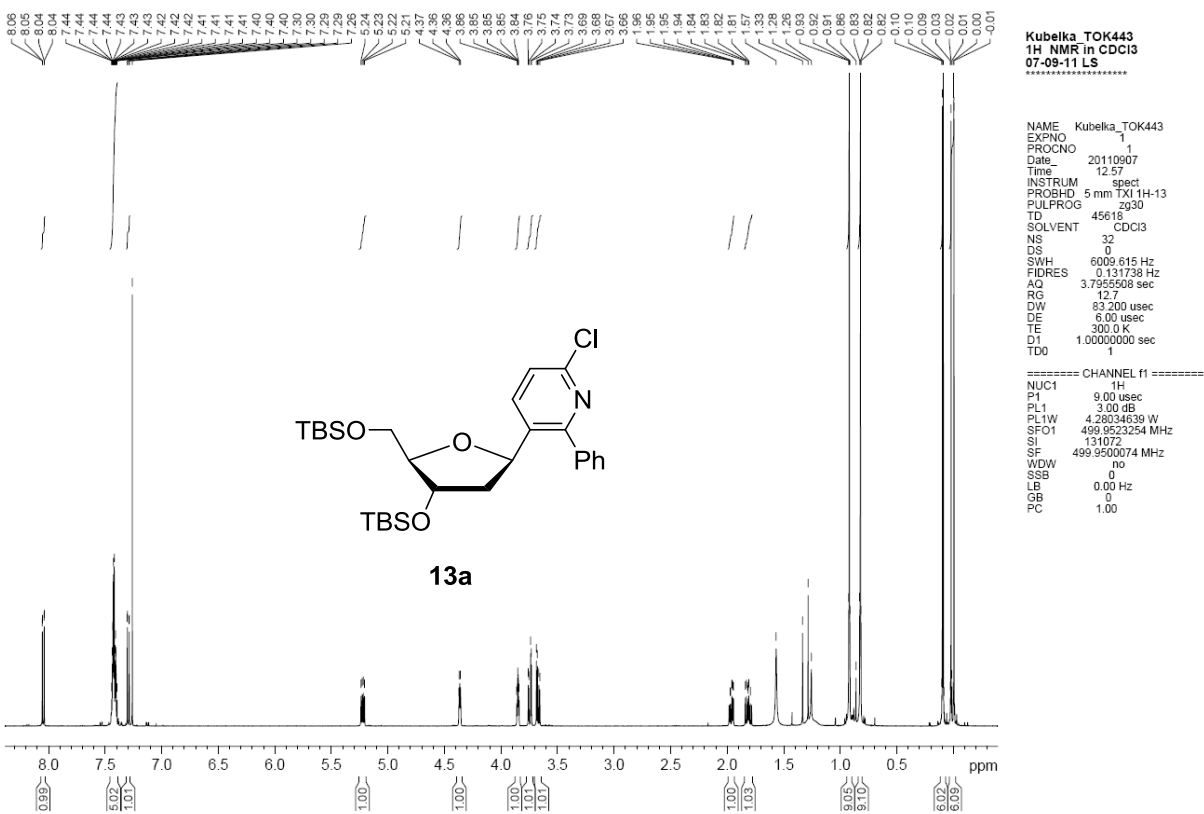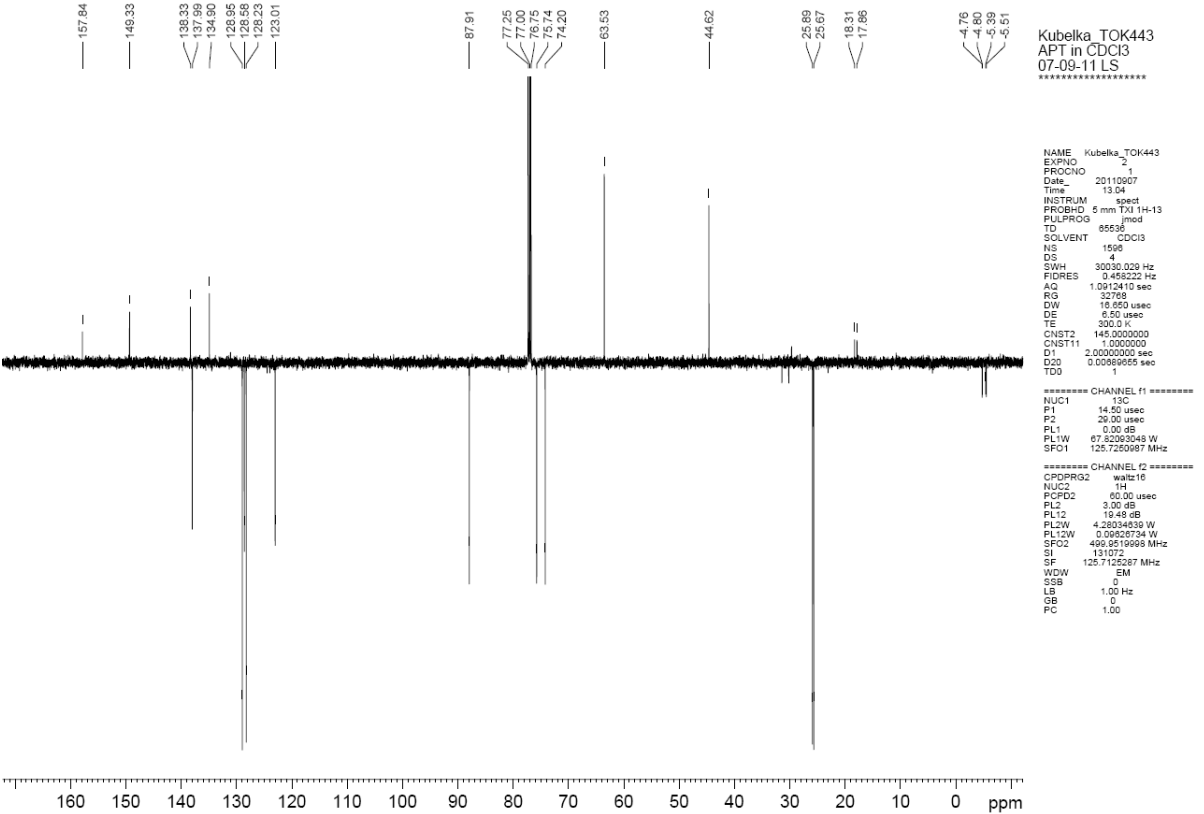

NMR Spectra of **13b**

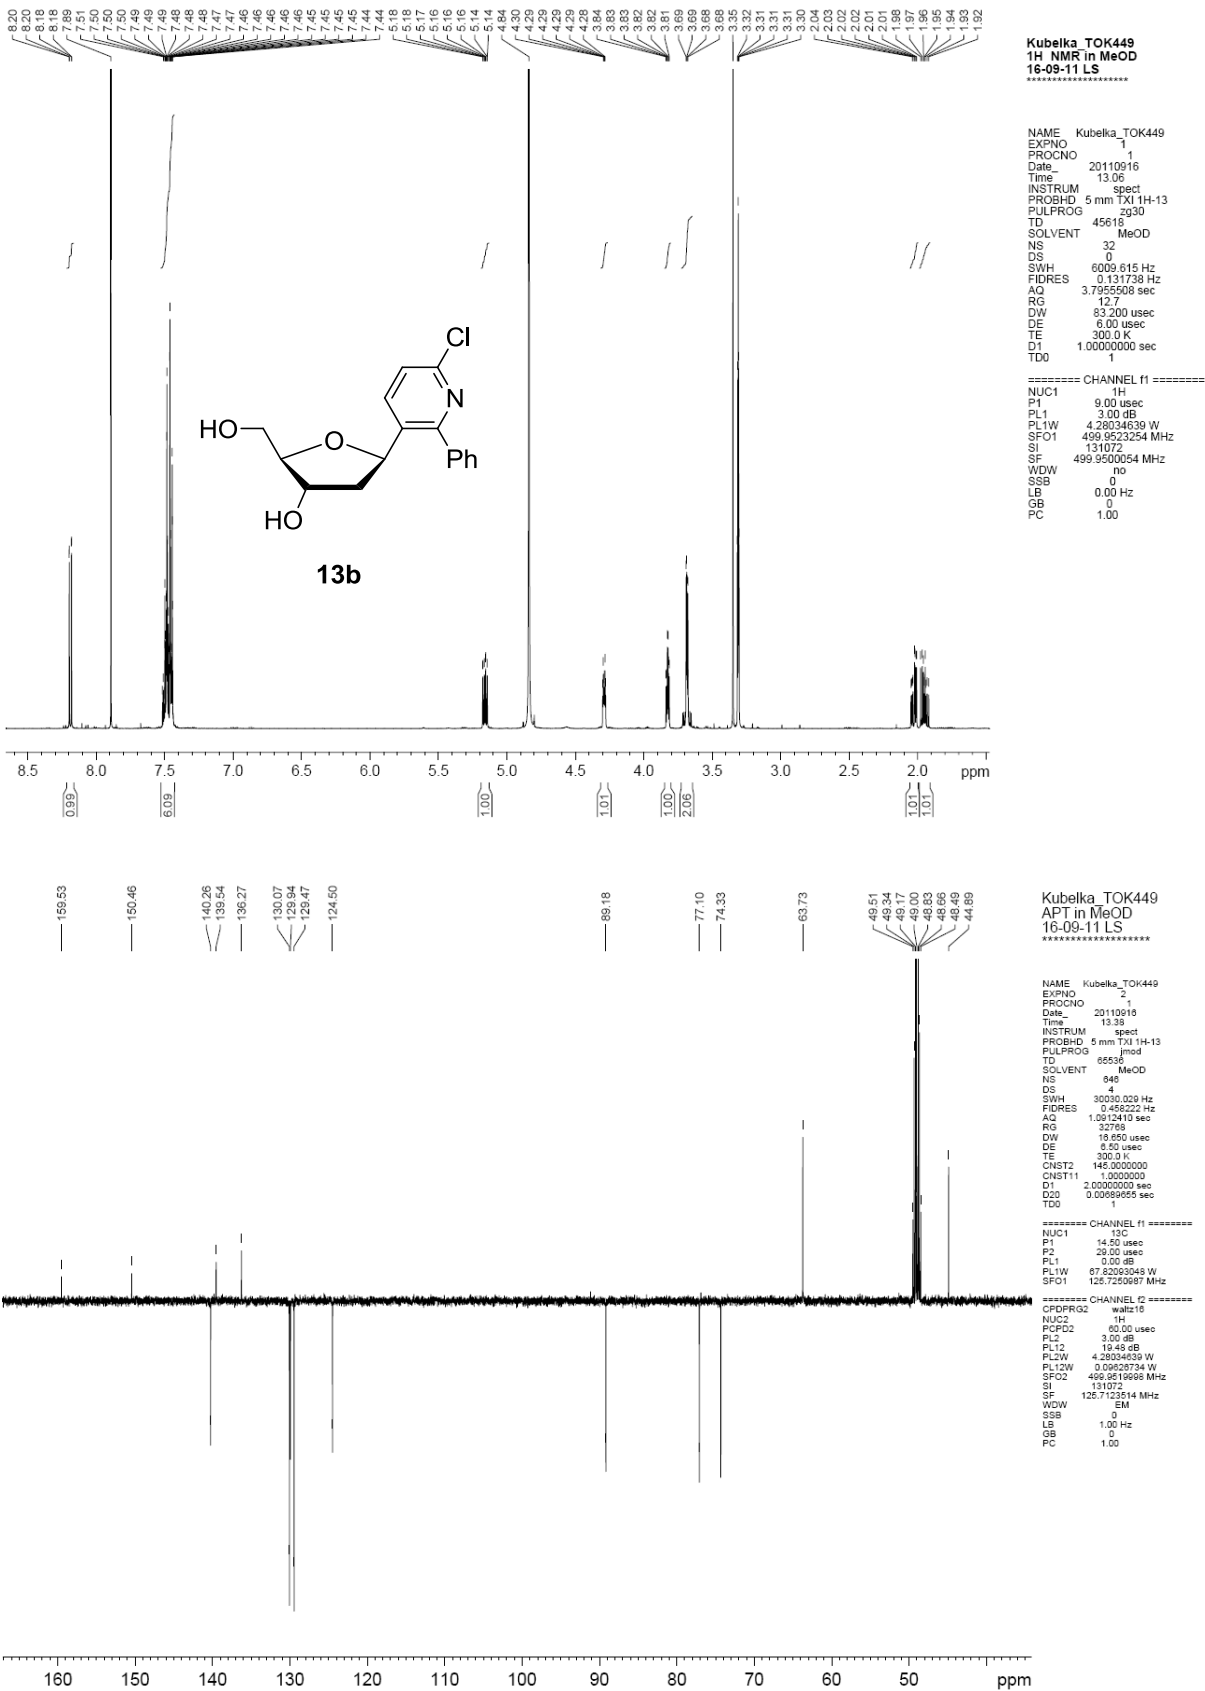

NMR Spectra of **14a**

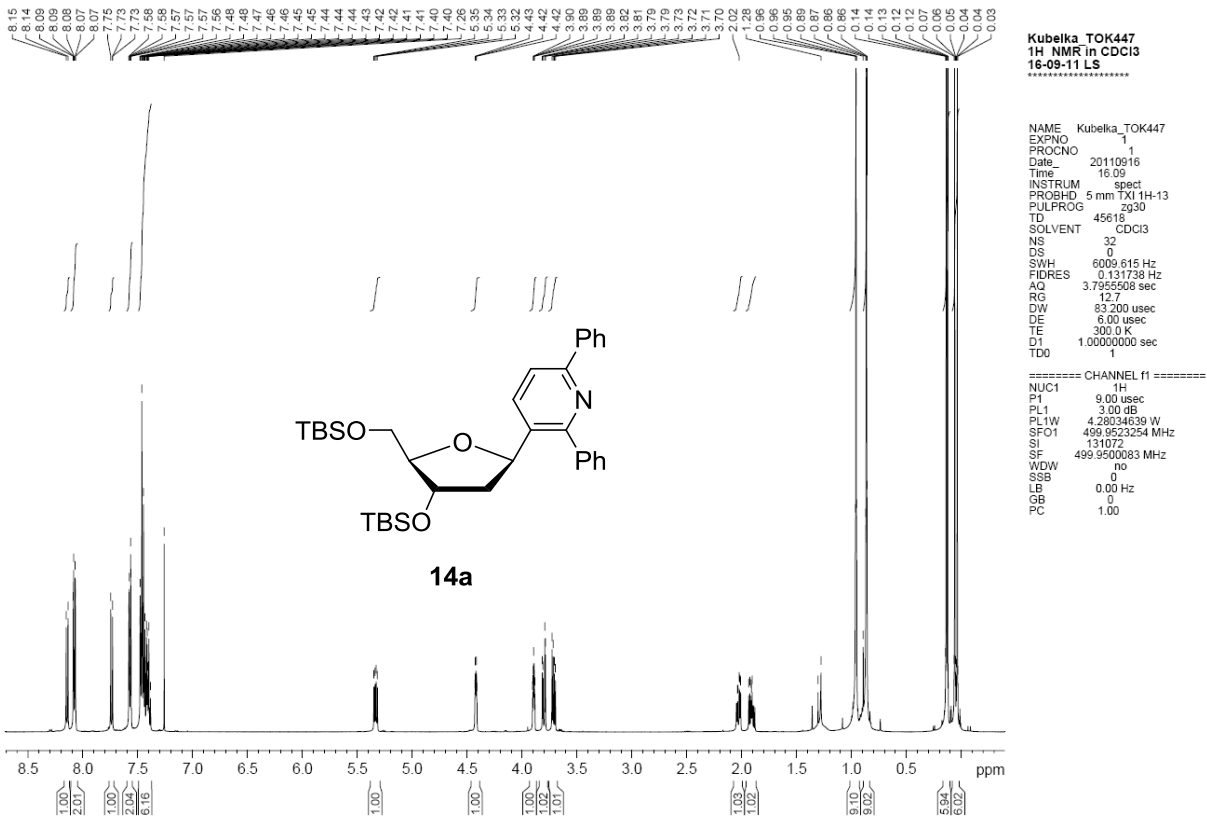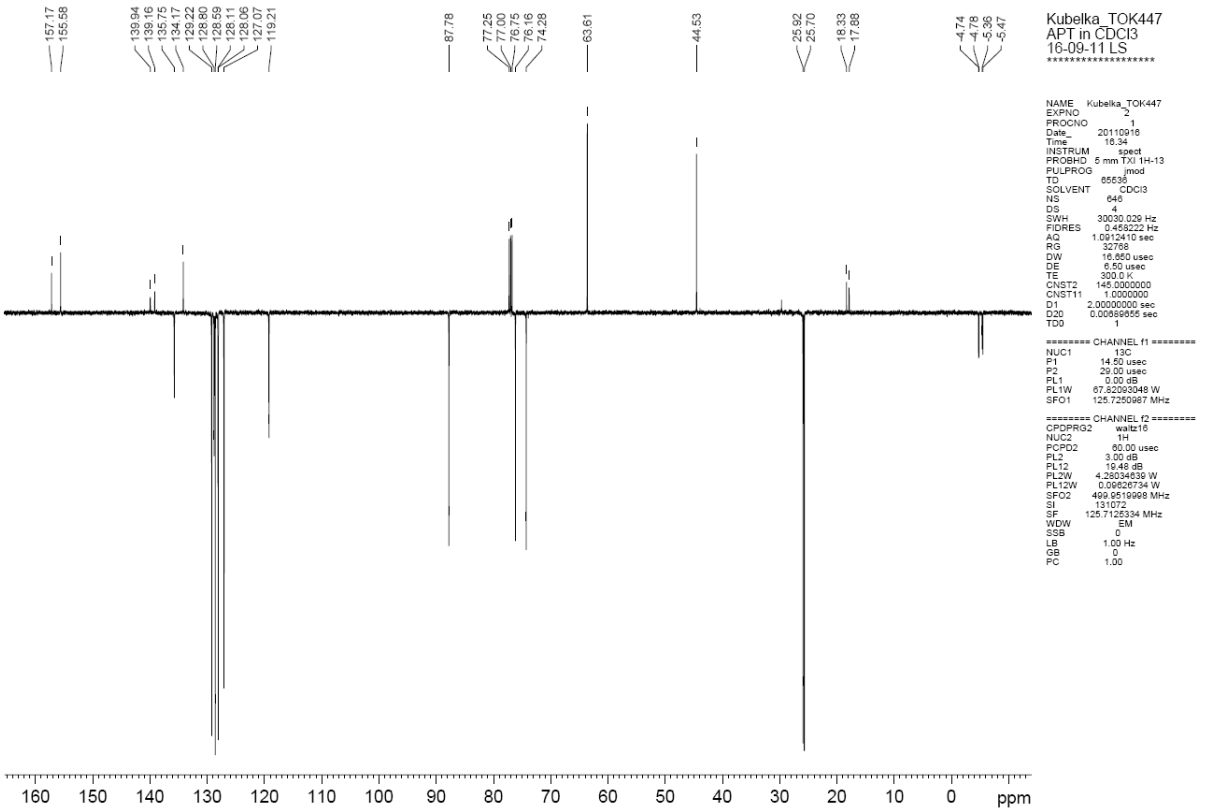

NMR Spectra of **14b**

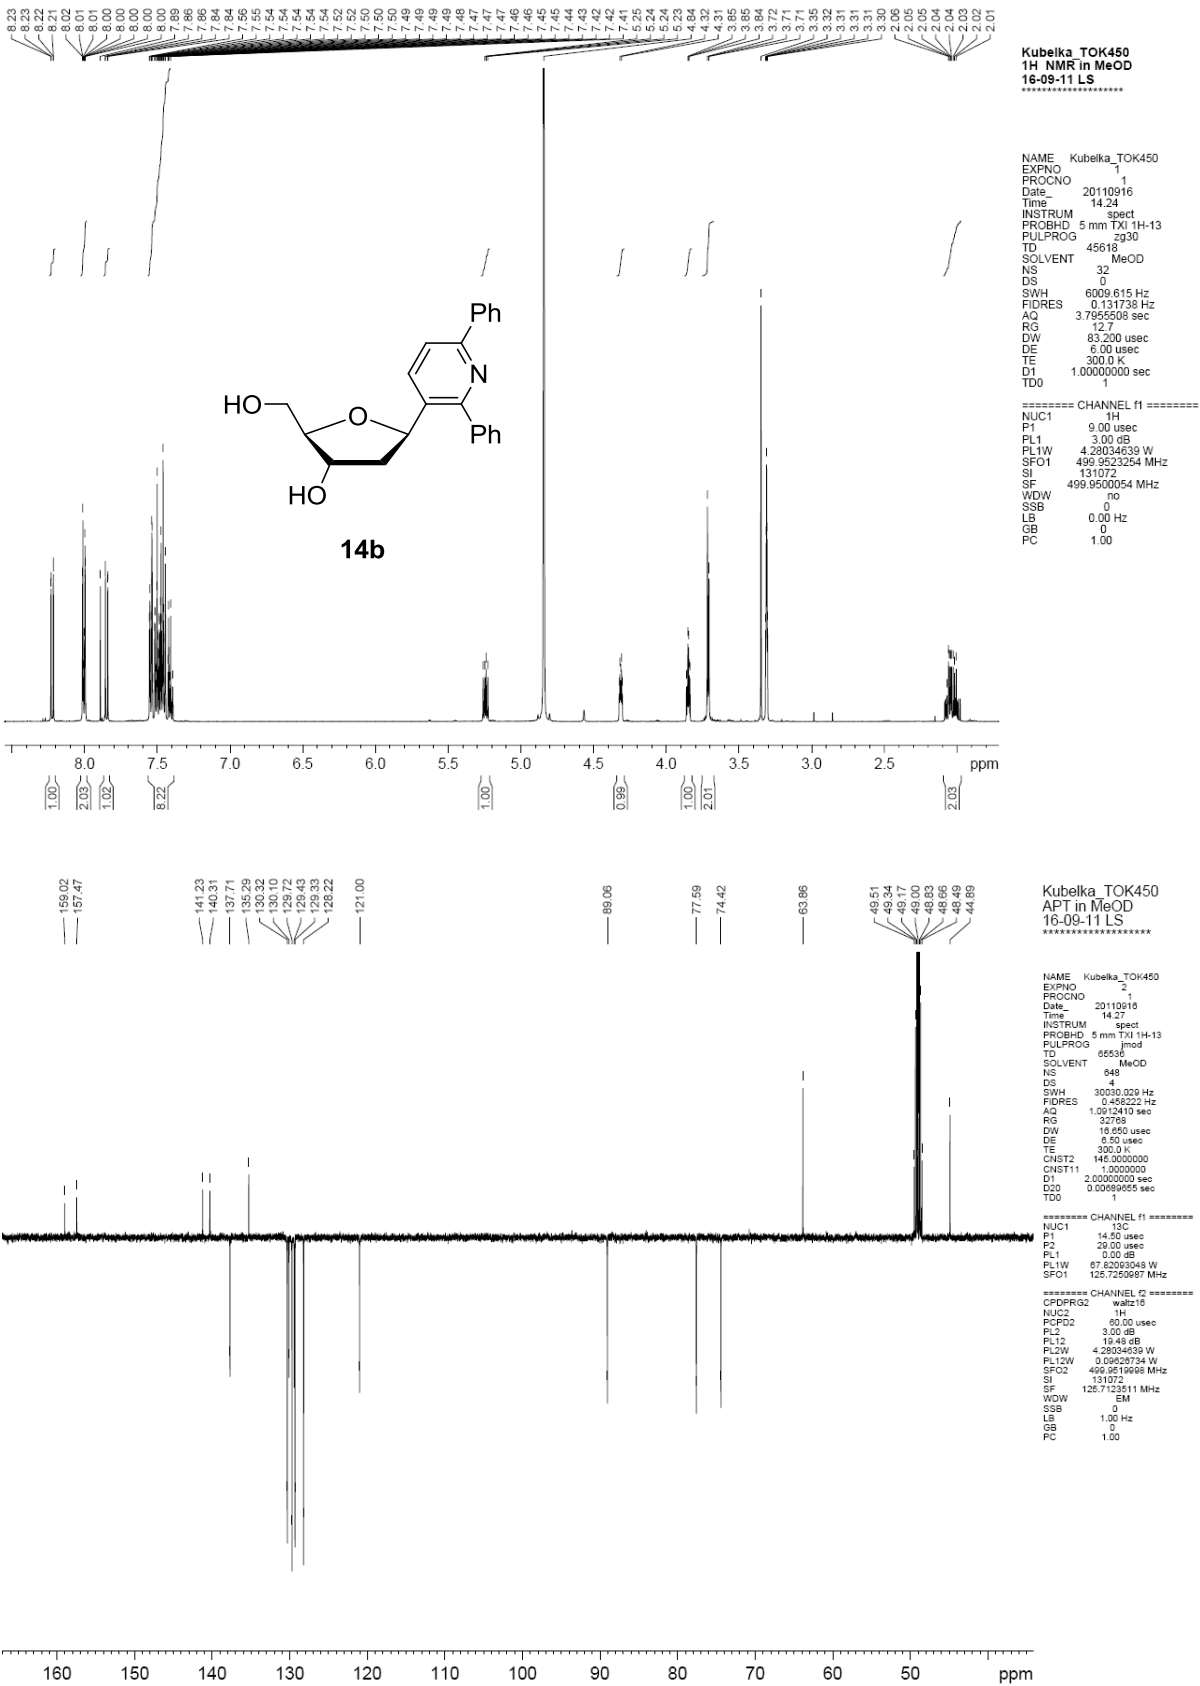

NMR Spectra of **15a**

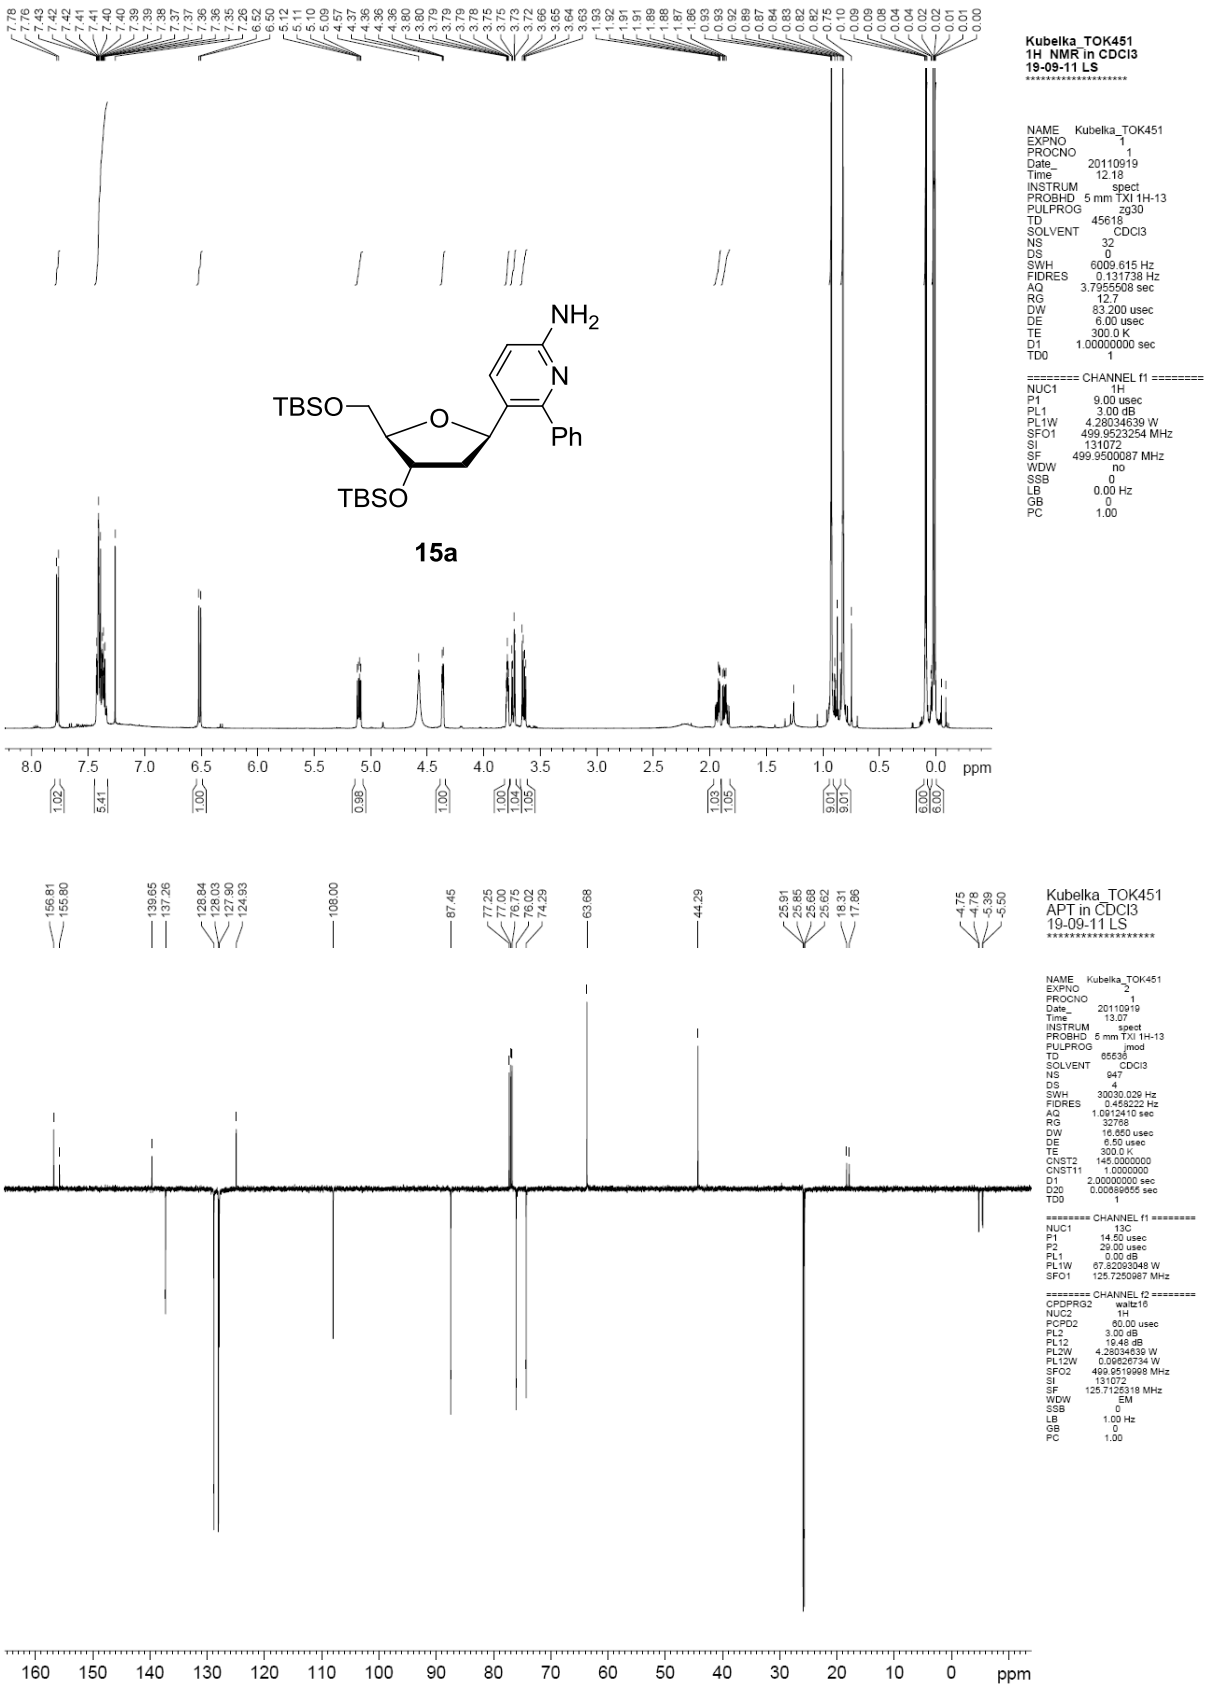

NMR Spectra of **15b**

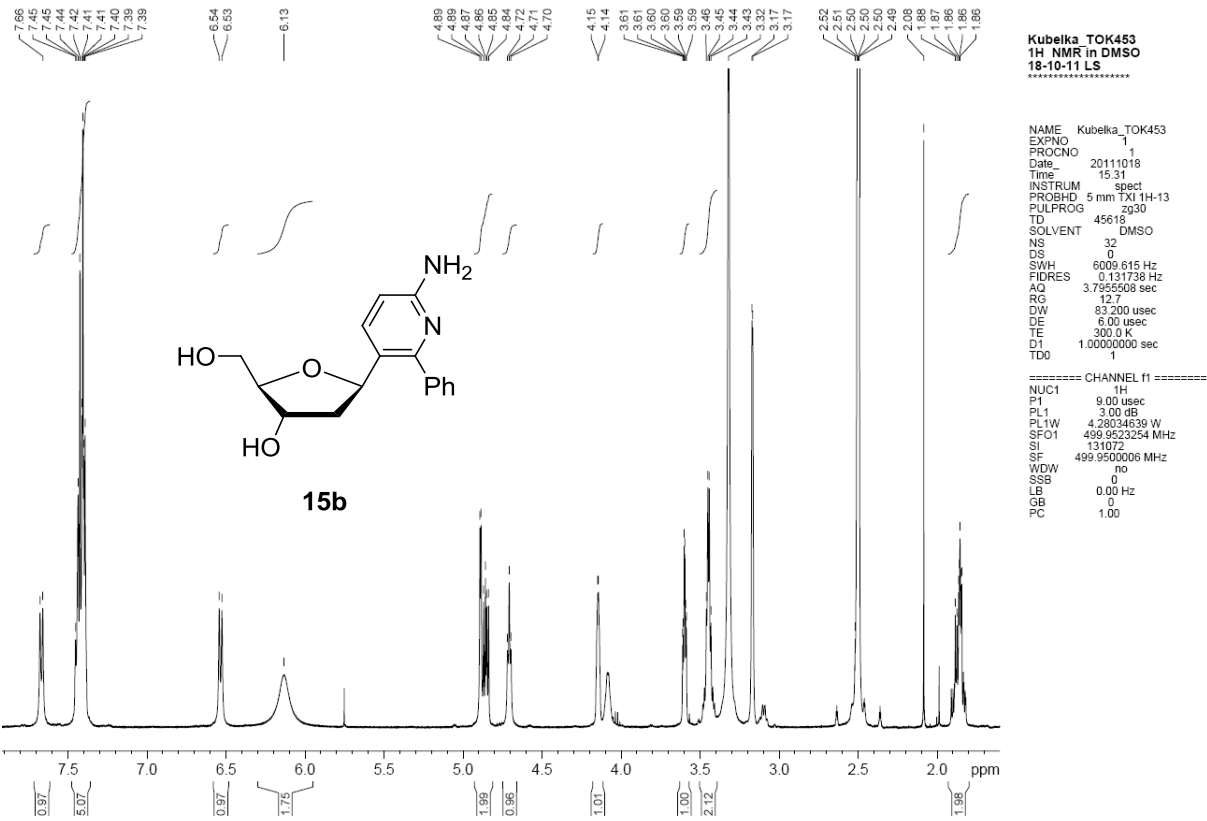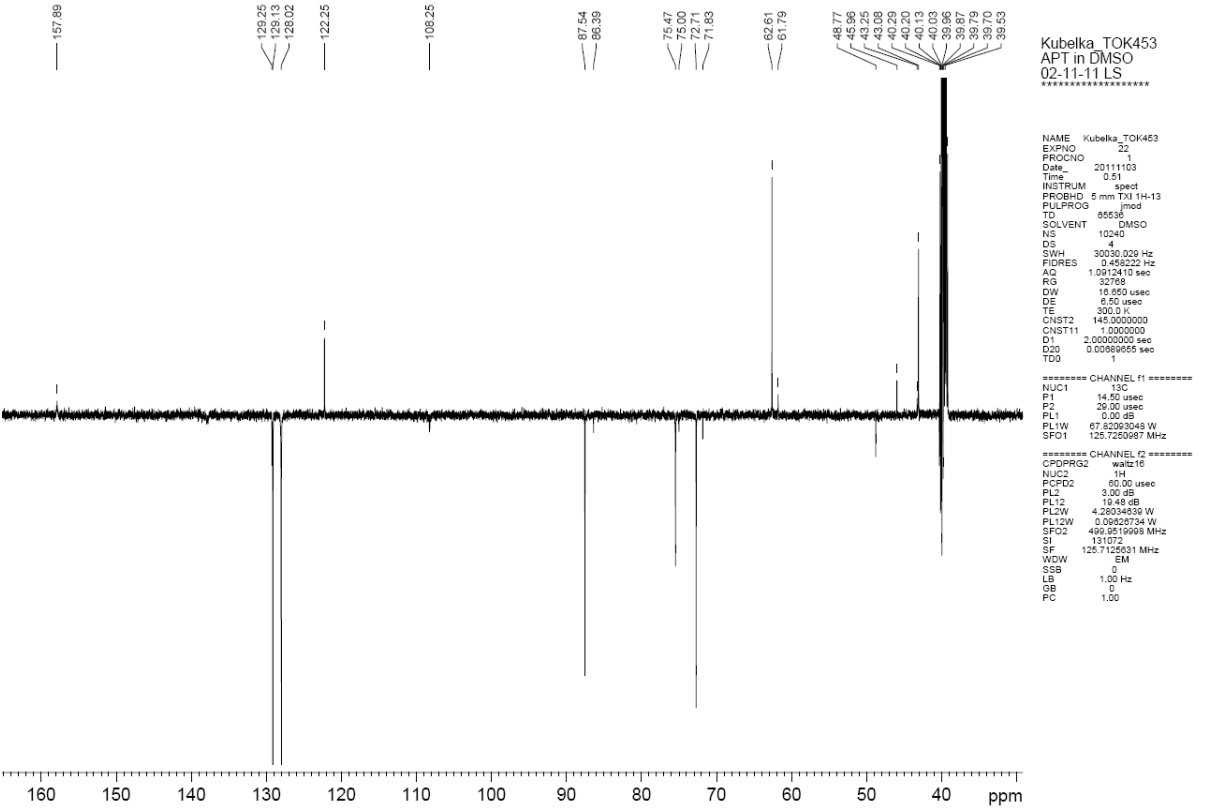

NMR Spectra of **16a**

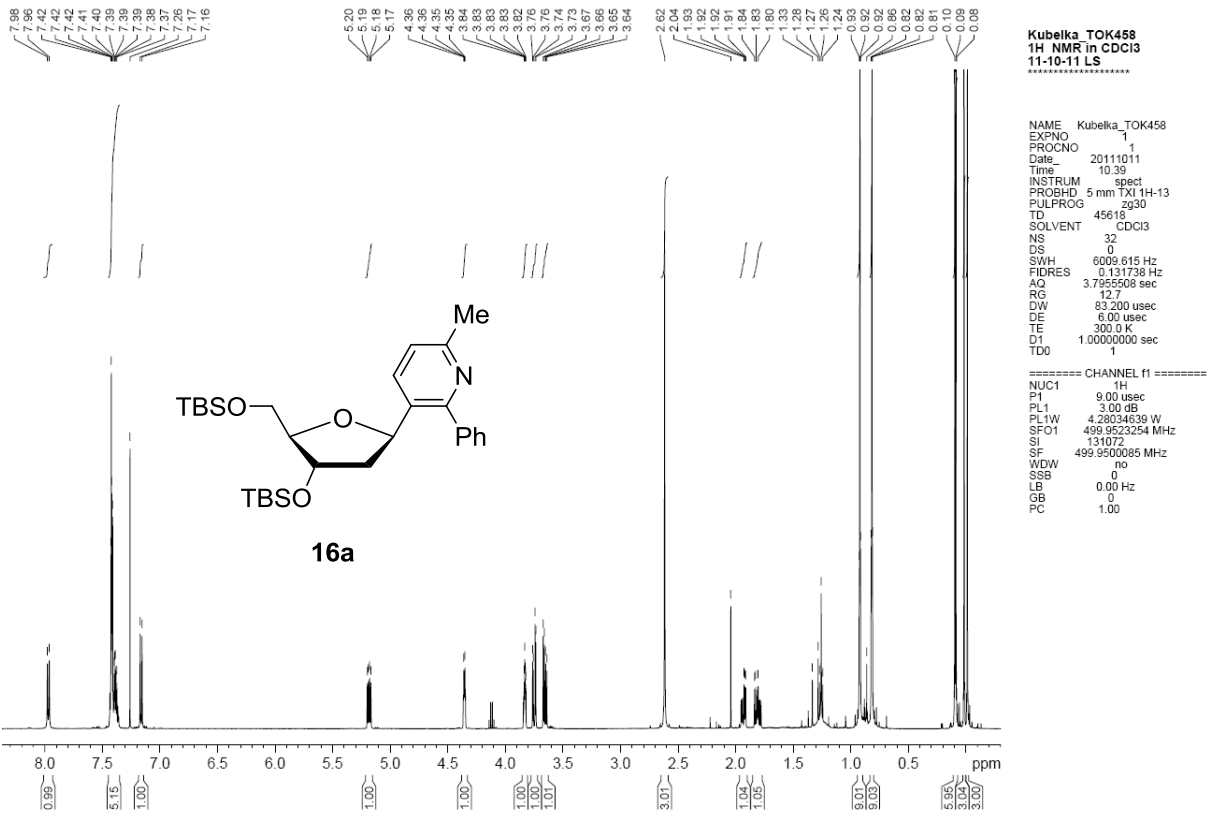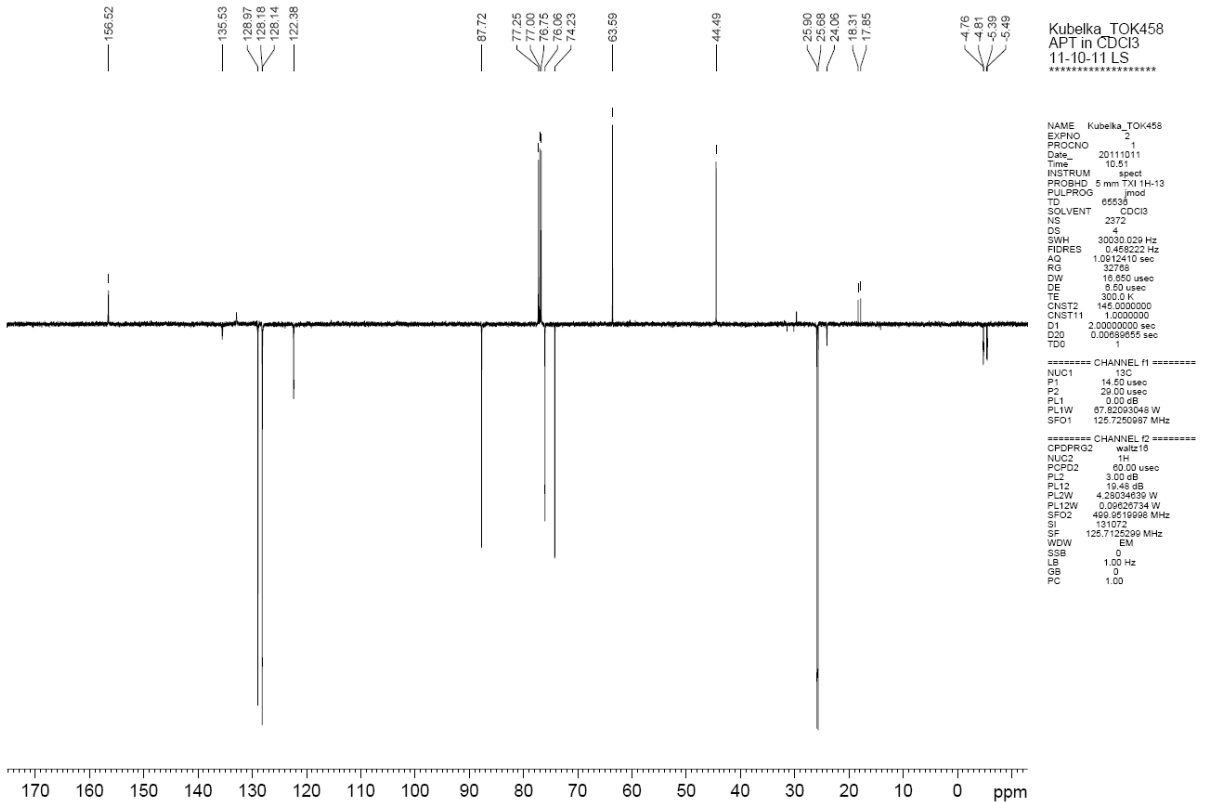

NMR Spectra of **16b**

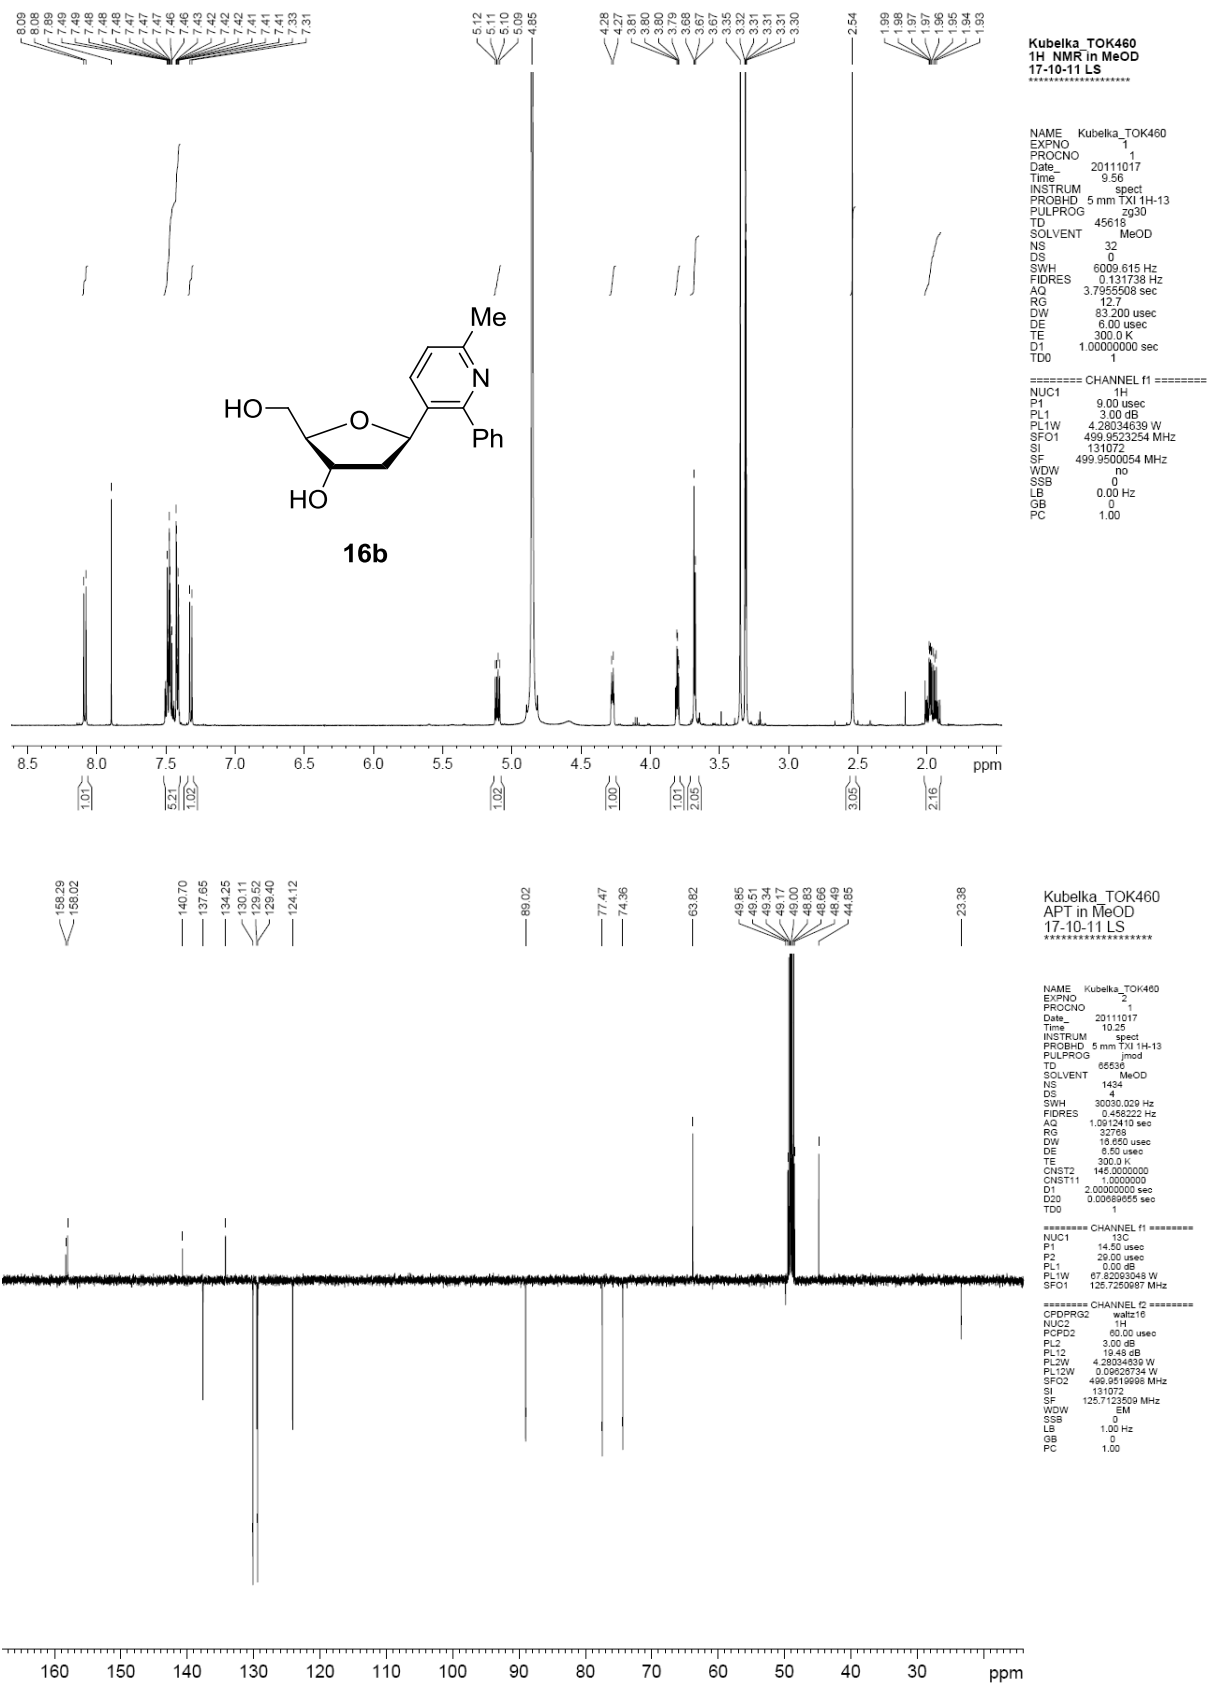





NMR Spectra of **18a**

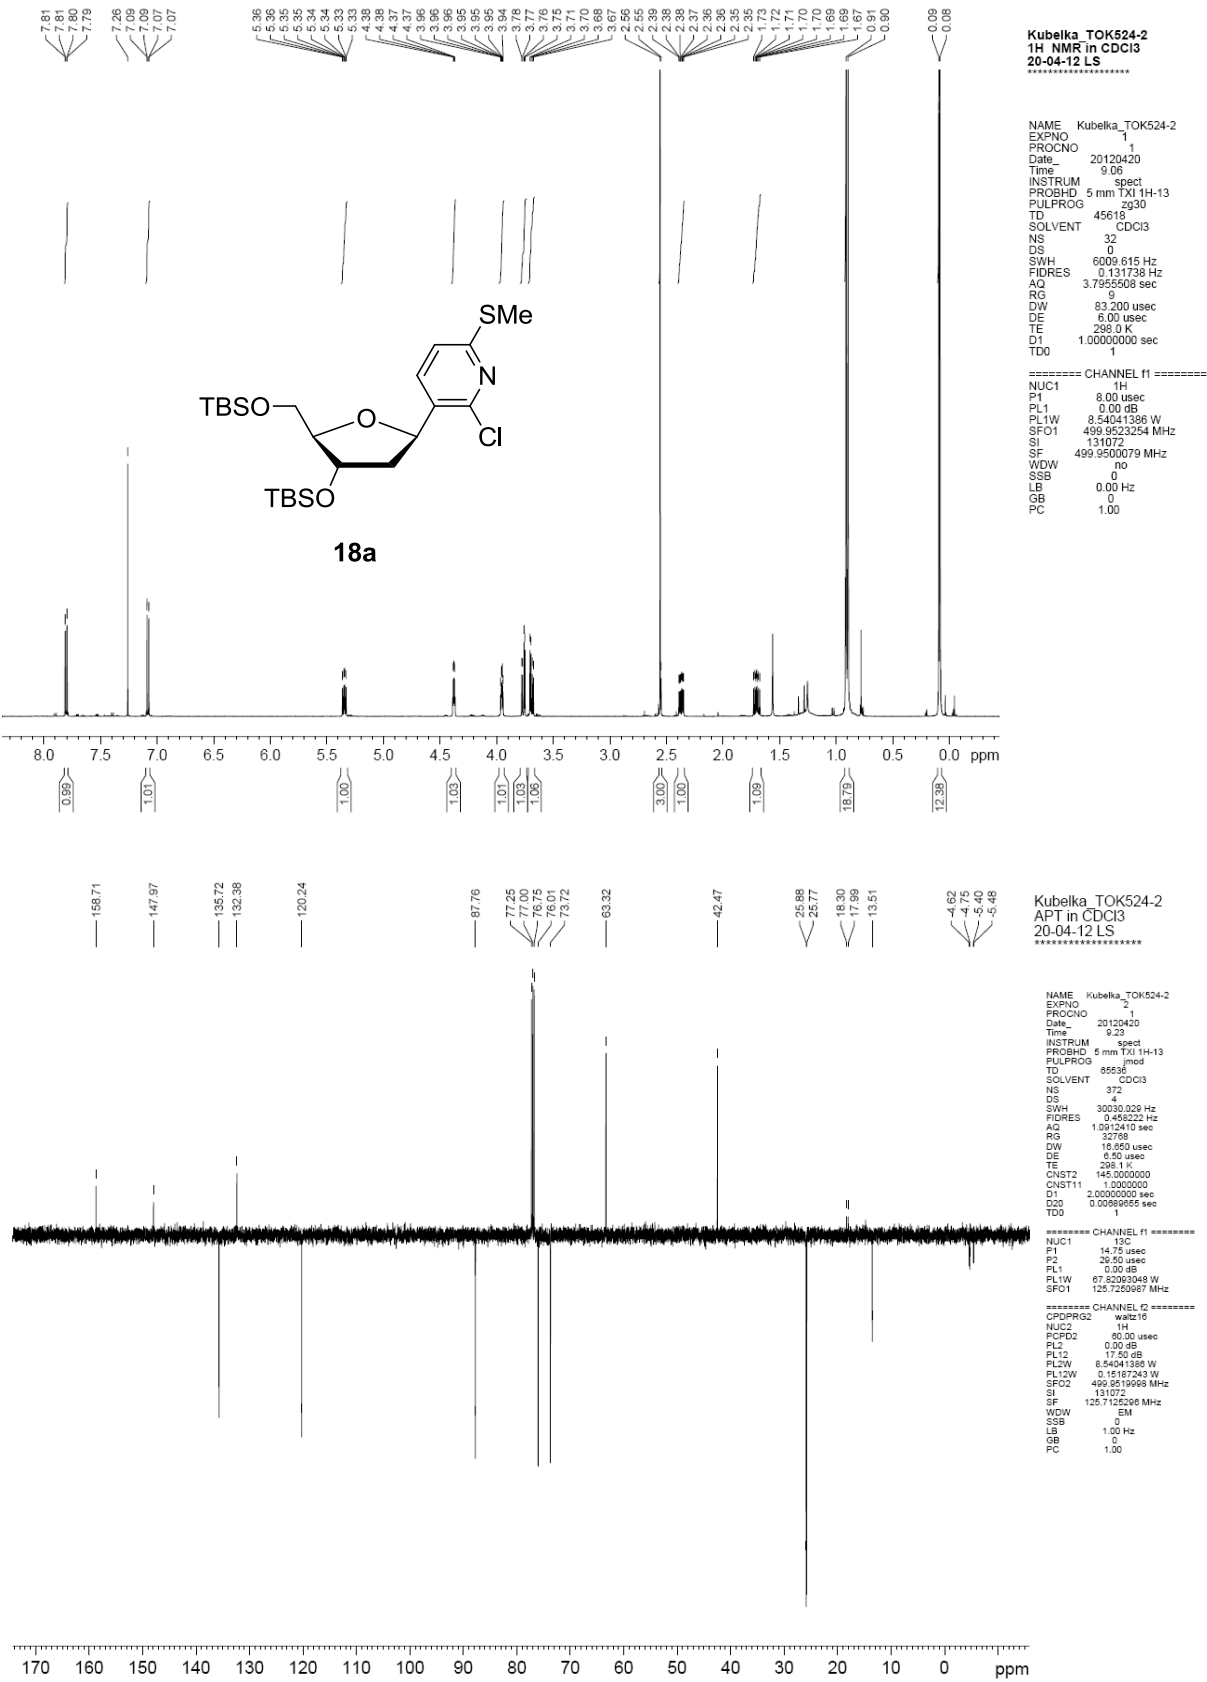

# NMR Spectra of **18b**

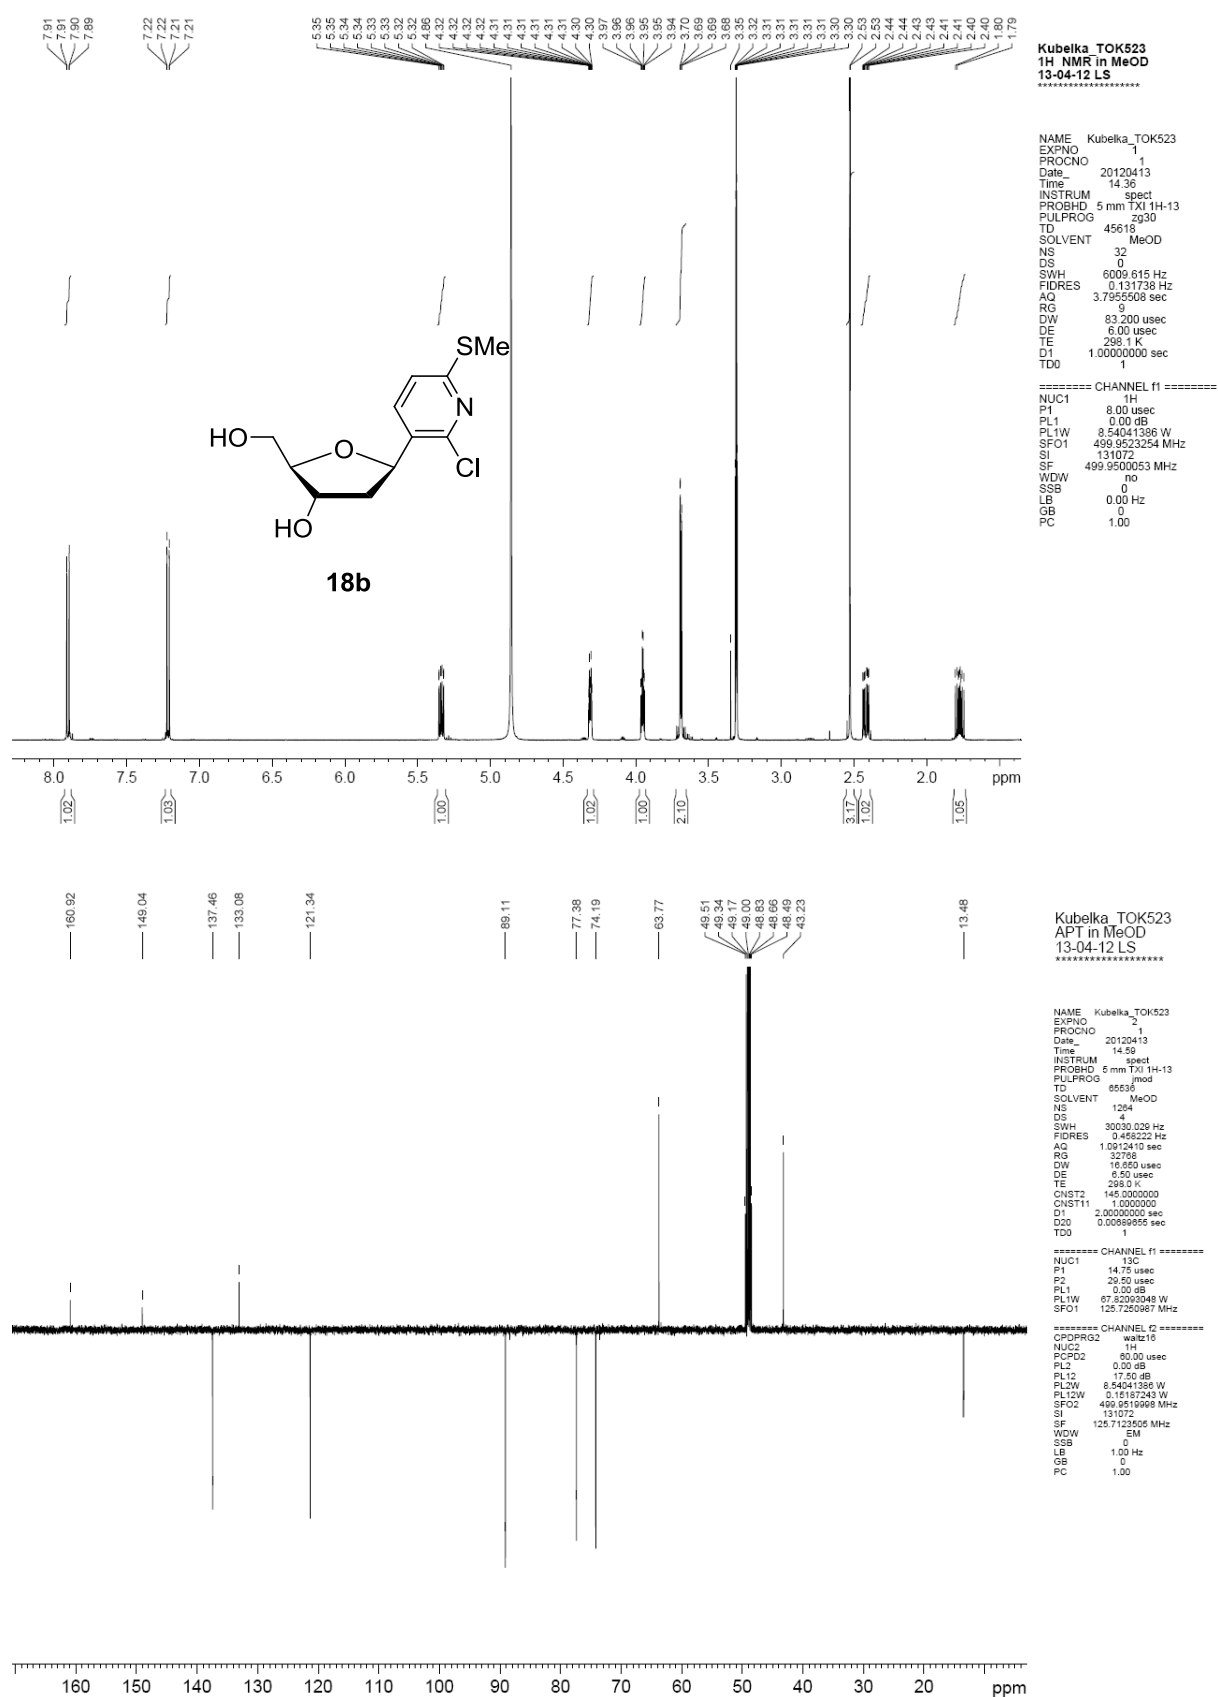

NMR Spectra of **19a**

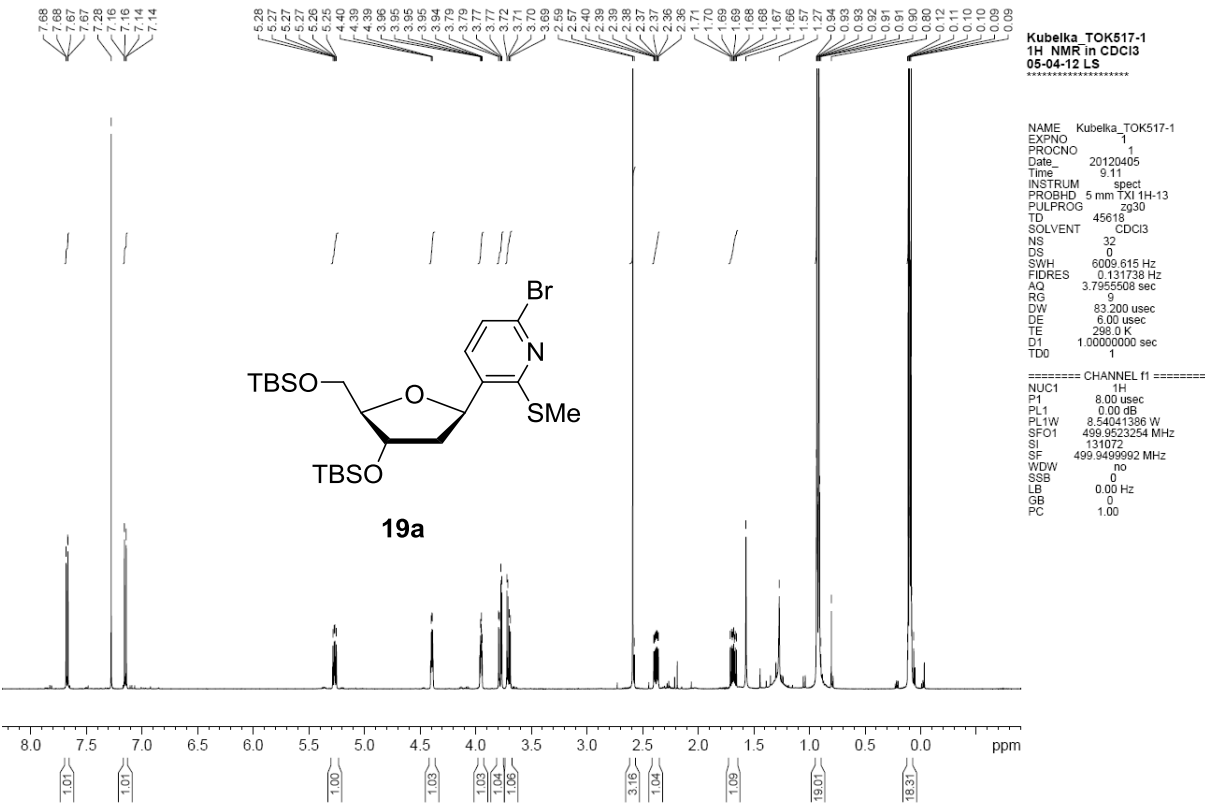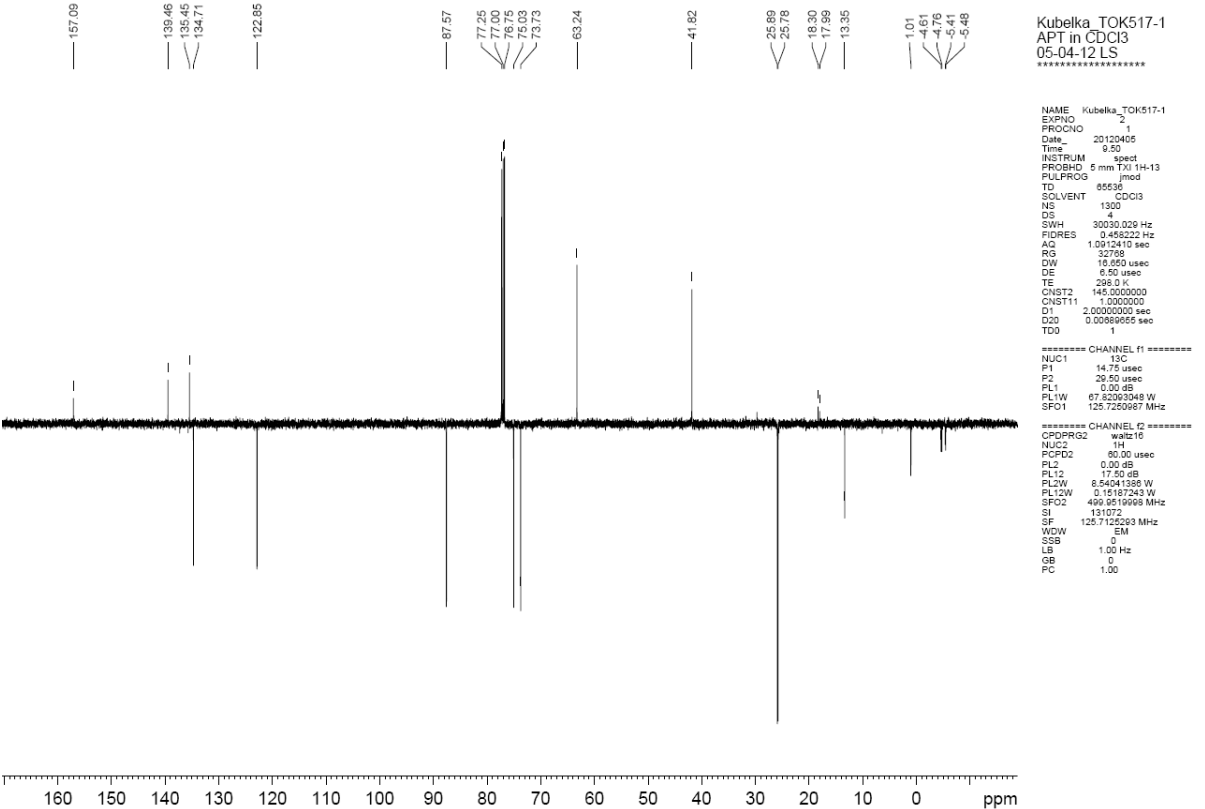

NMR Spectra of **19b**

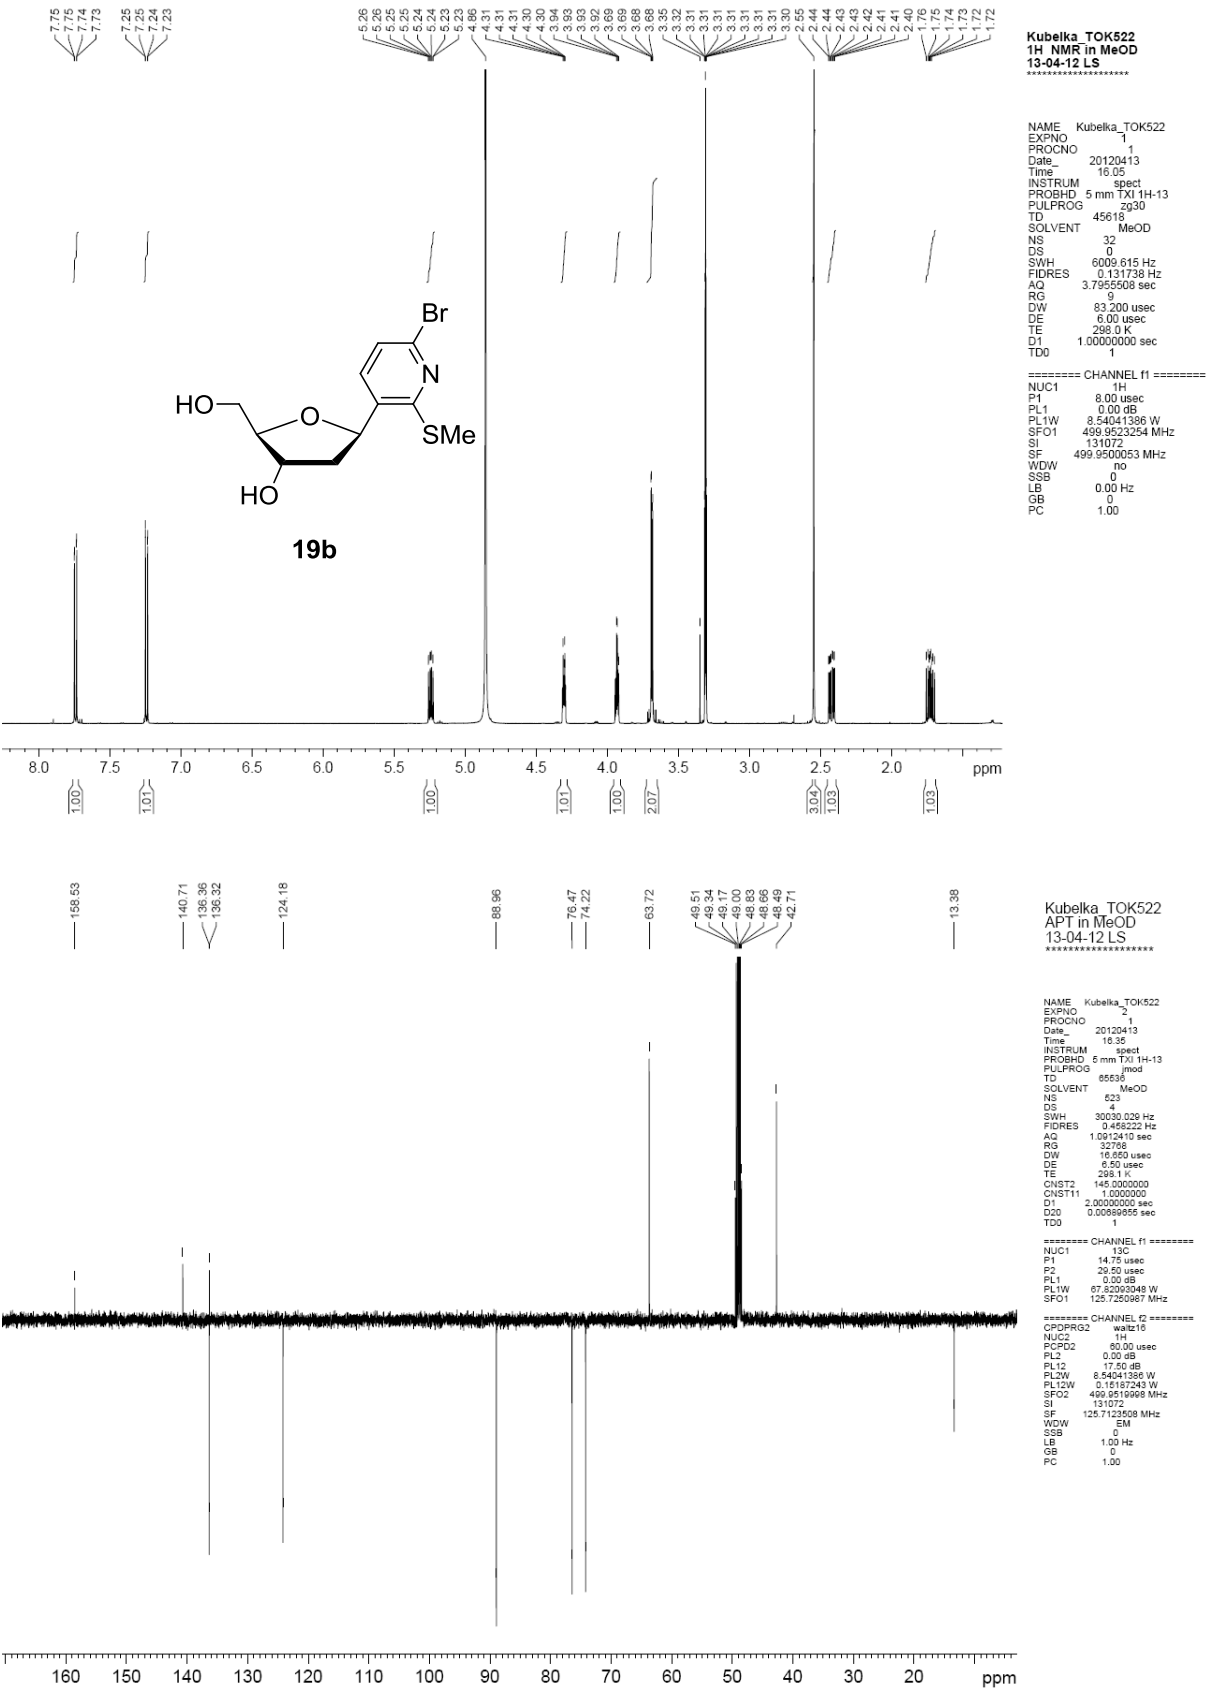

NMR Spectra of **20a**

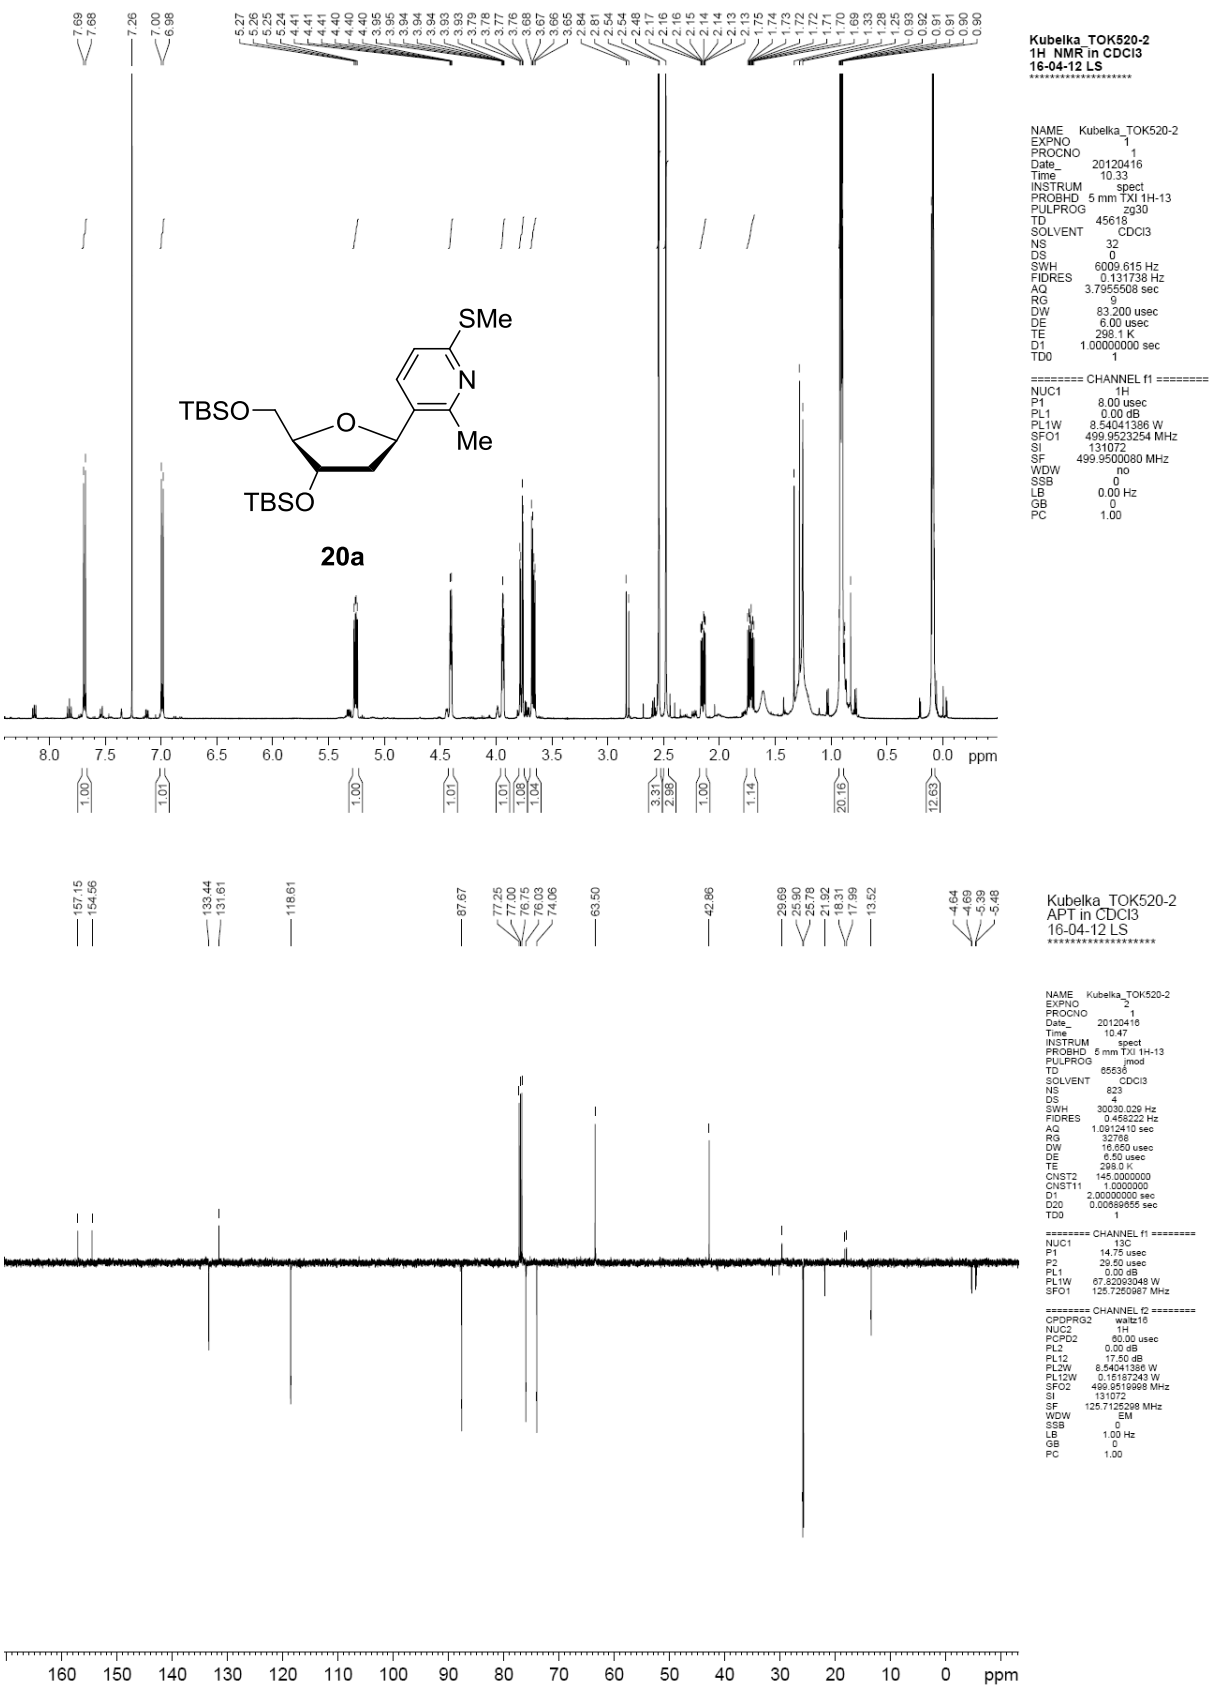

NMR Spectra of **20b**

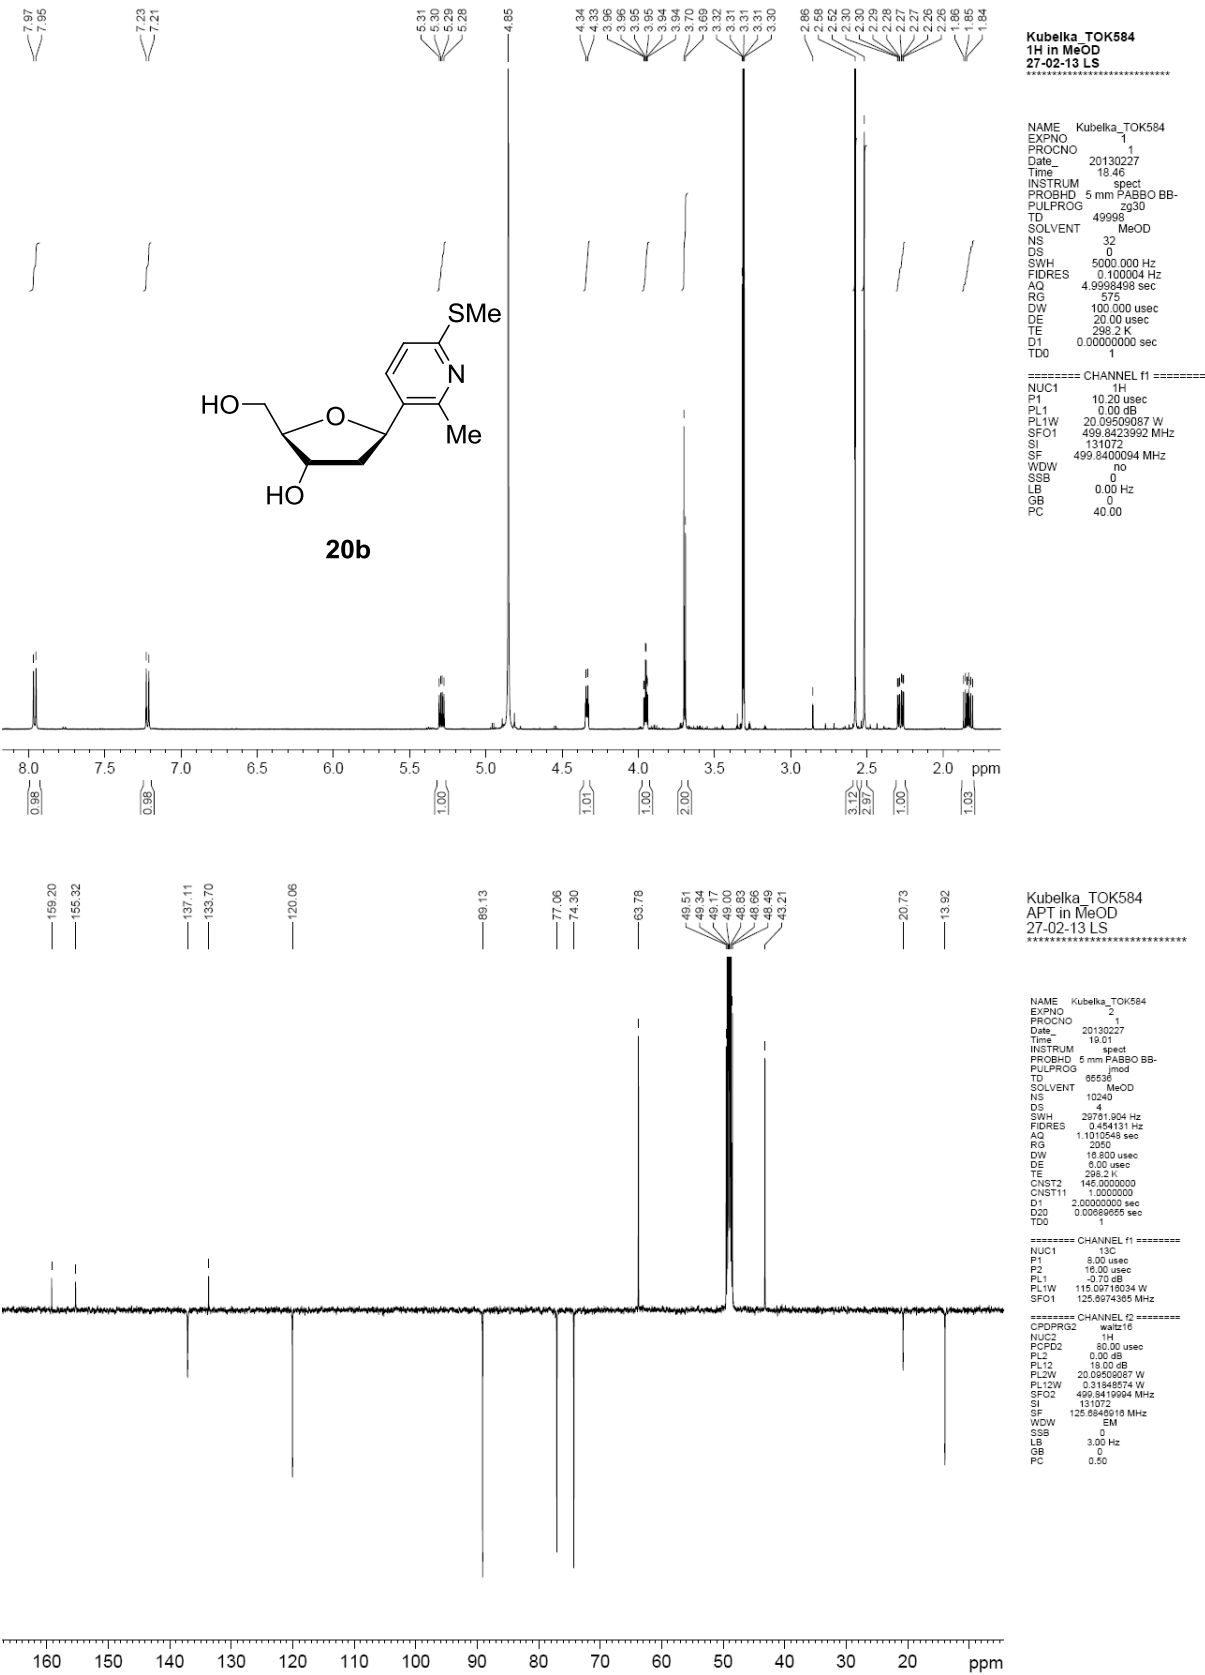

NMR Spectra of **21a**

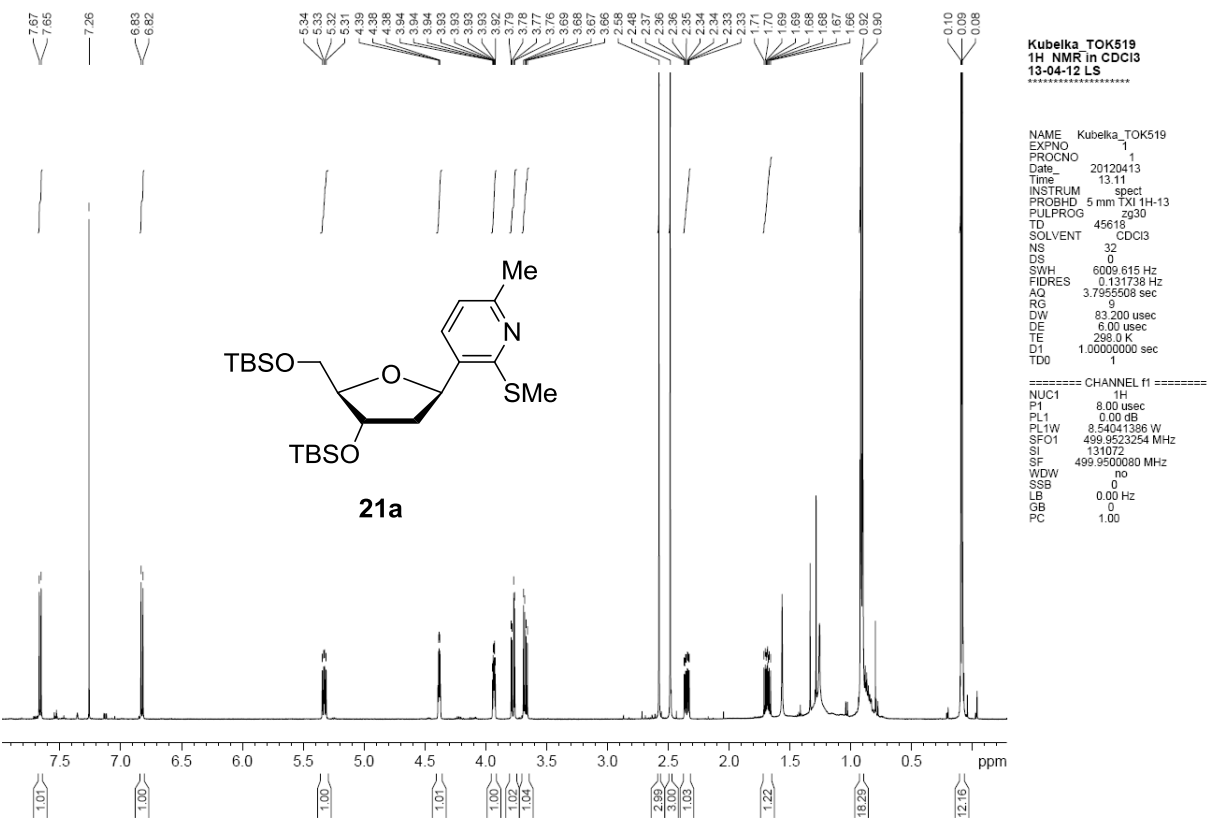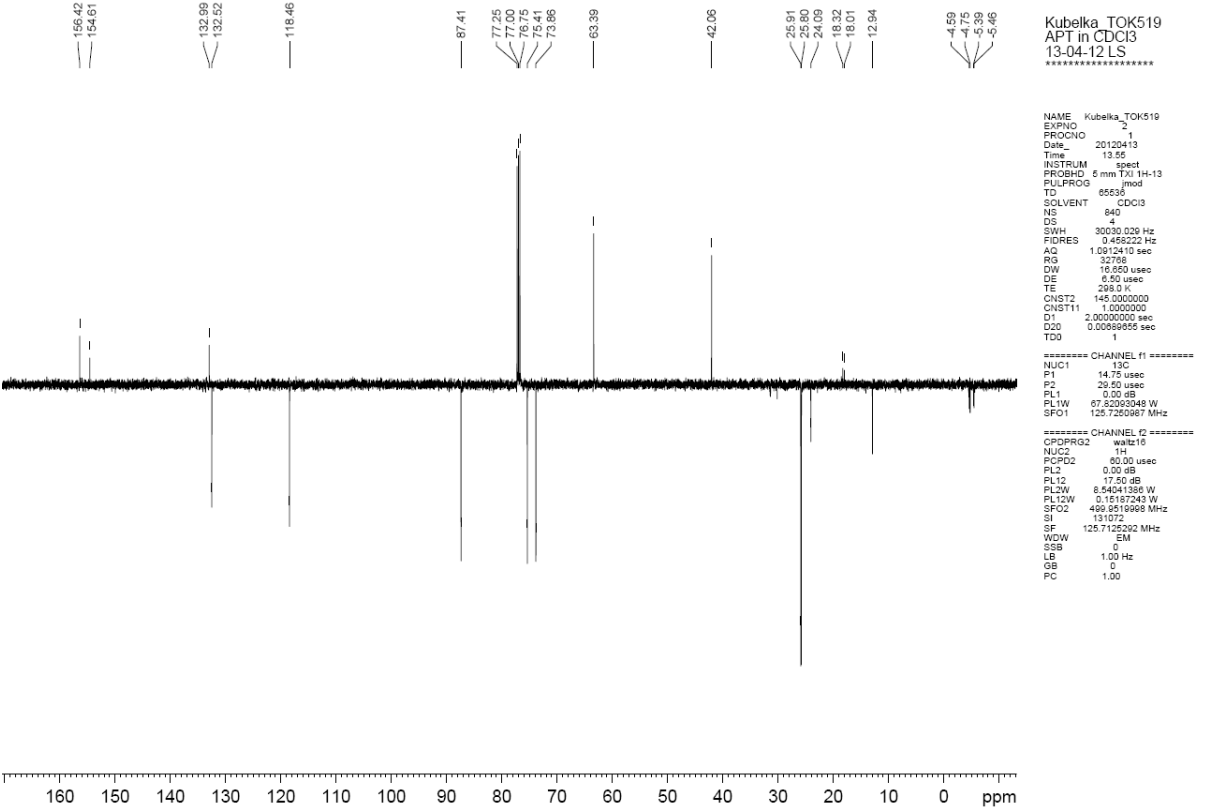





NMR Spectra of **22a**

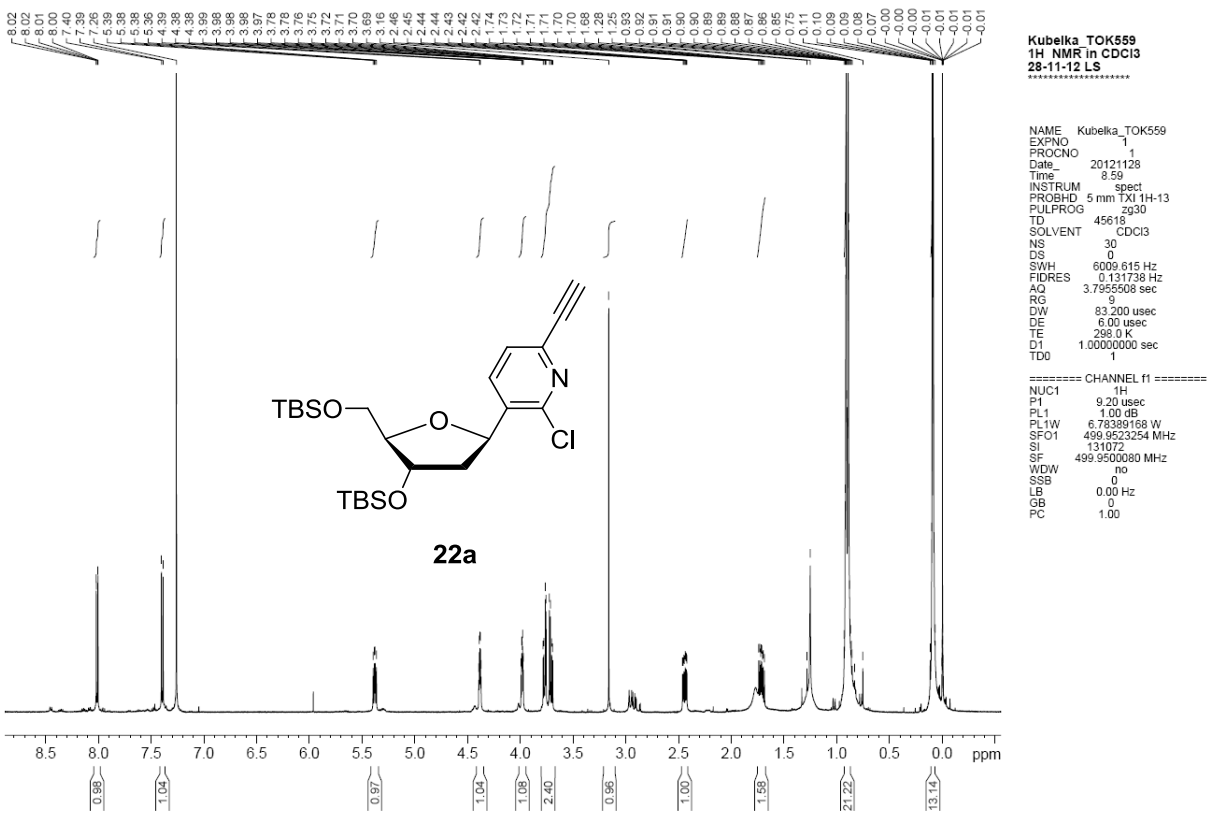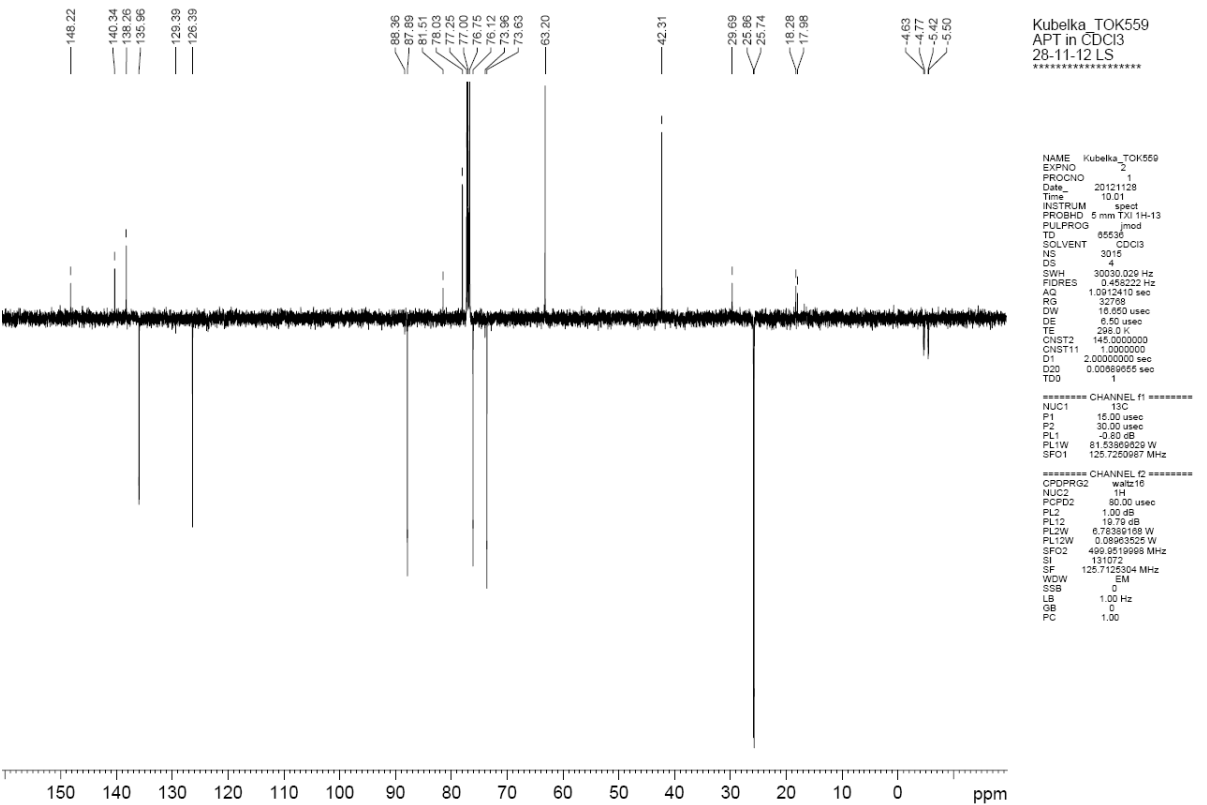



NMR Spectra of **23a**

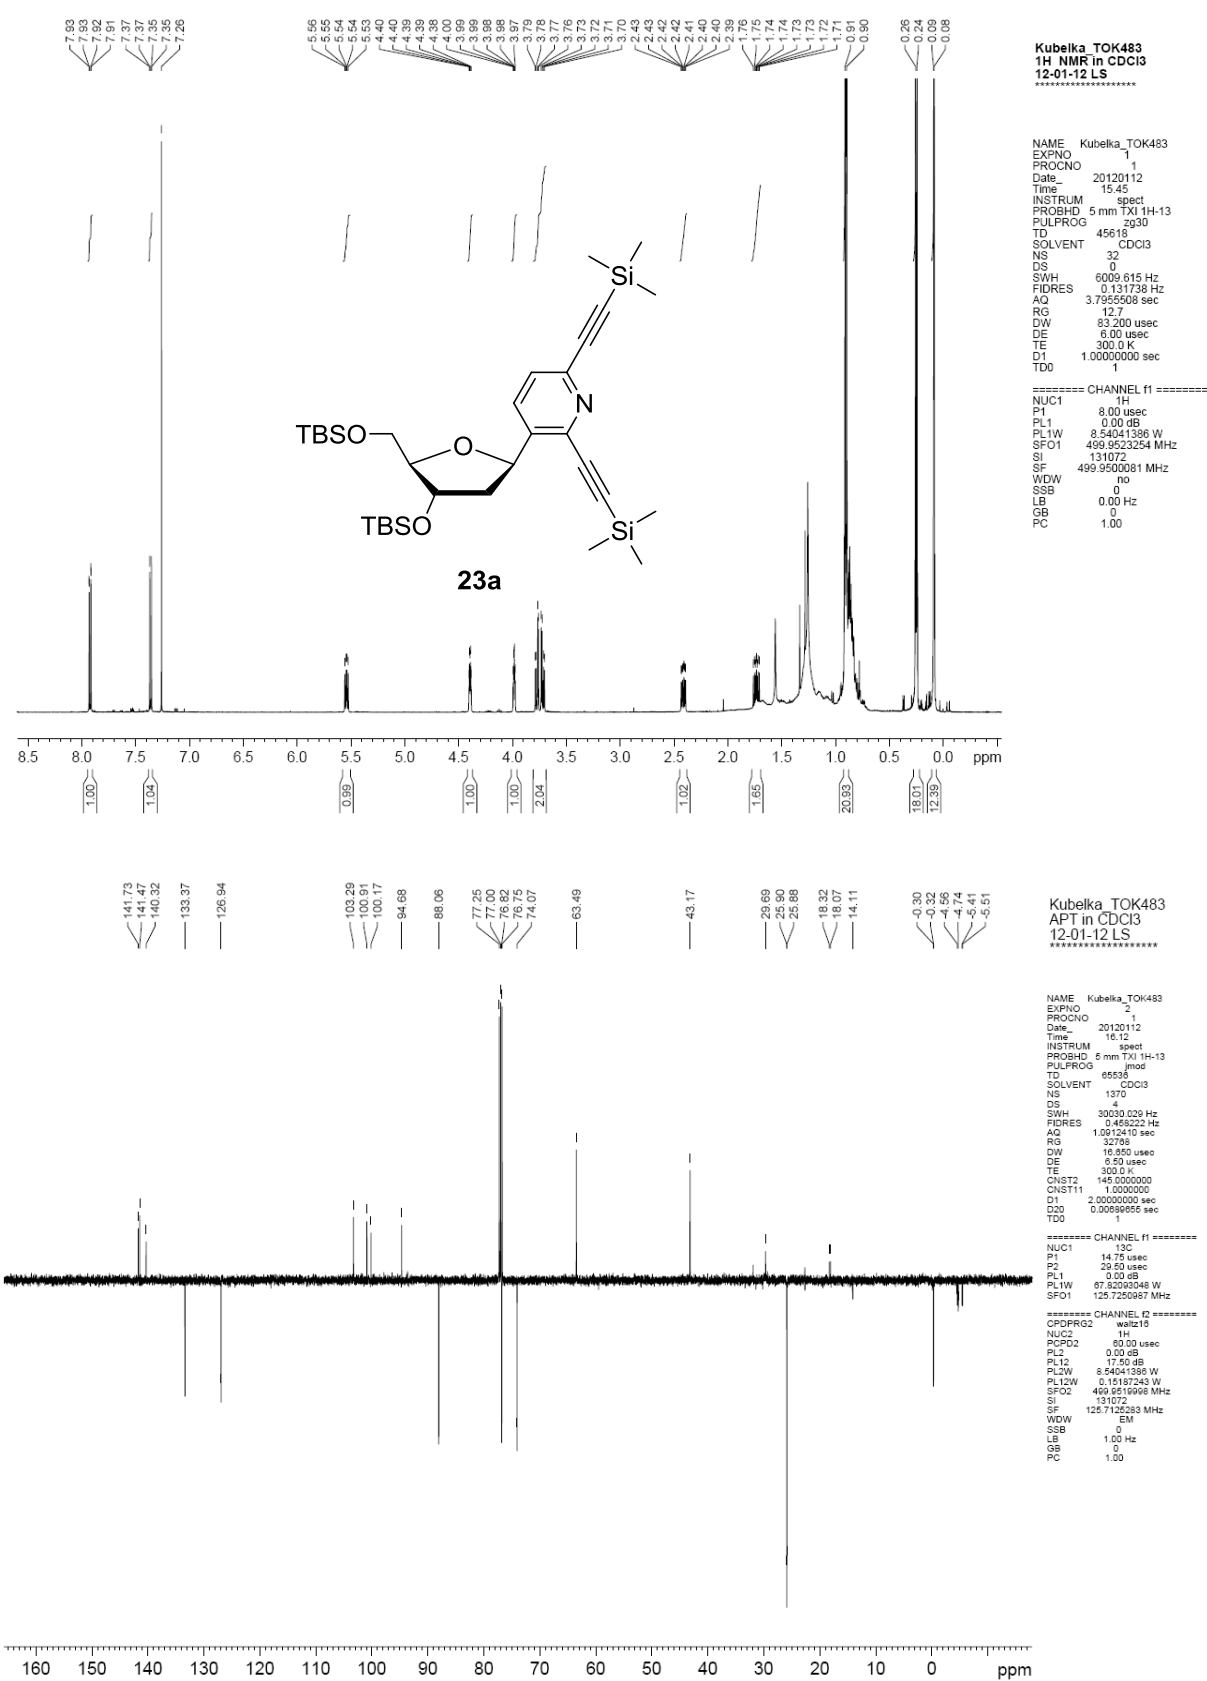

# NMR Spectra of **23b**

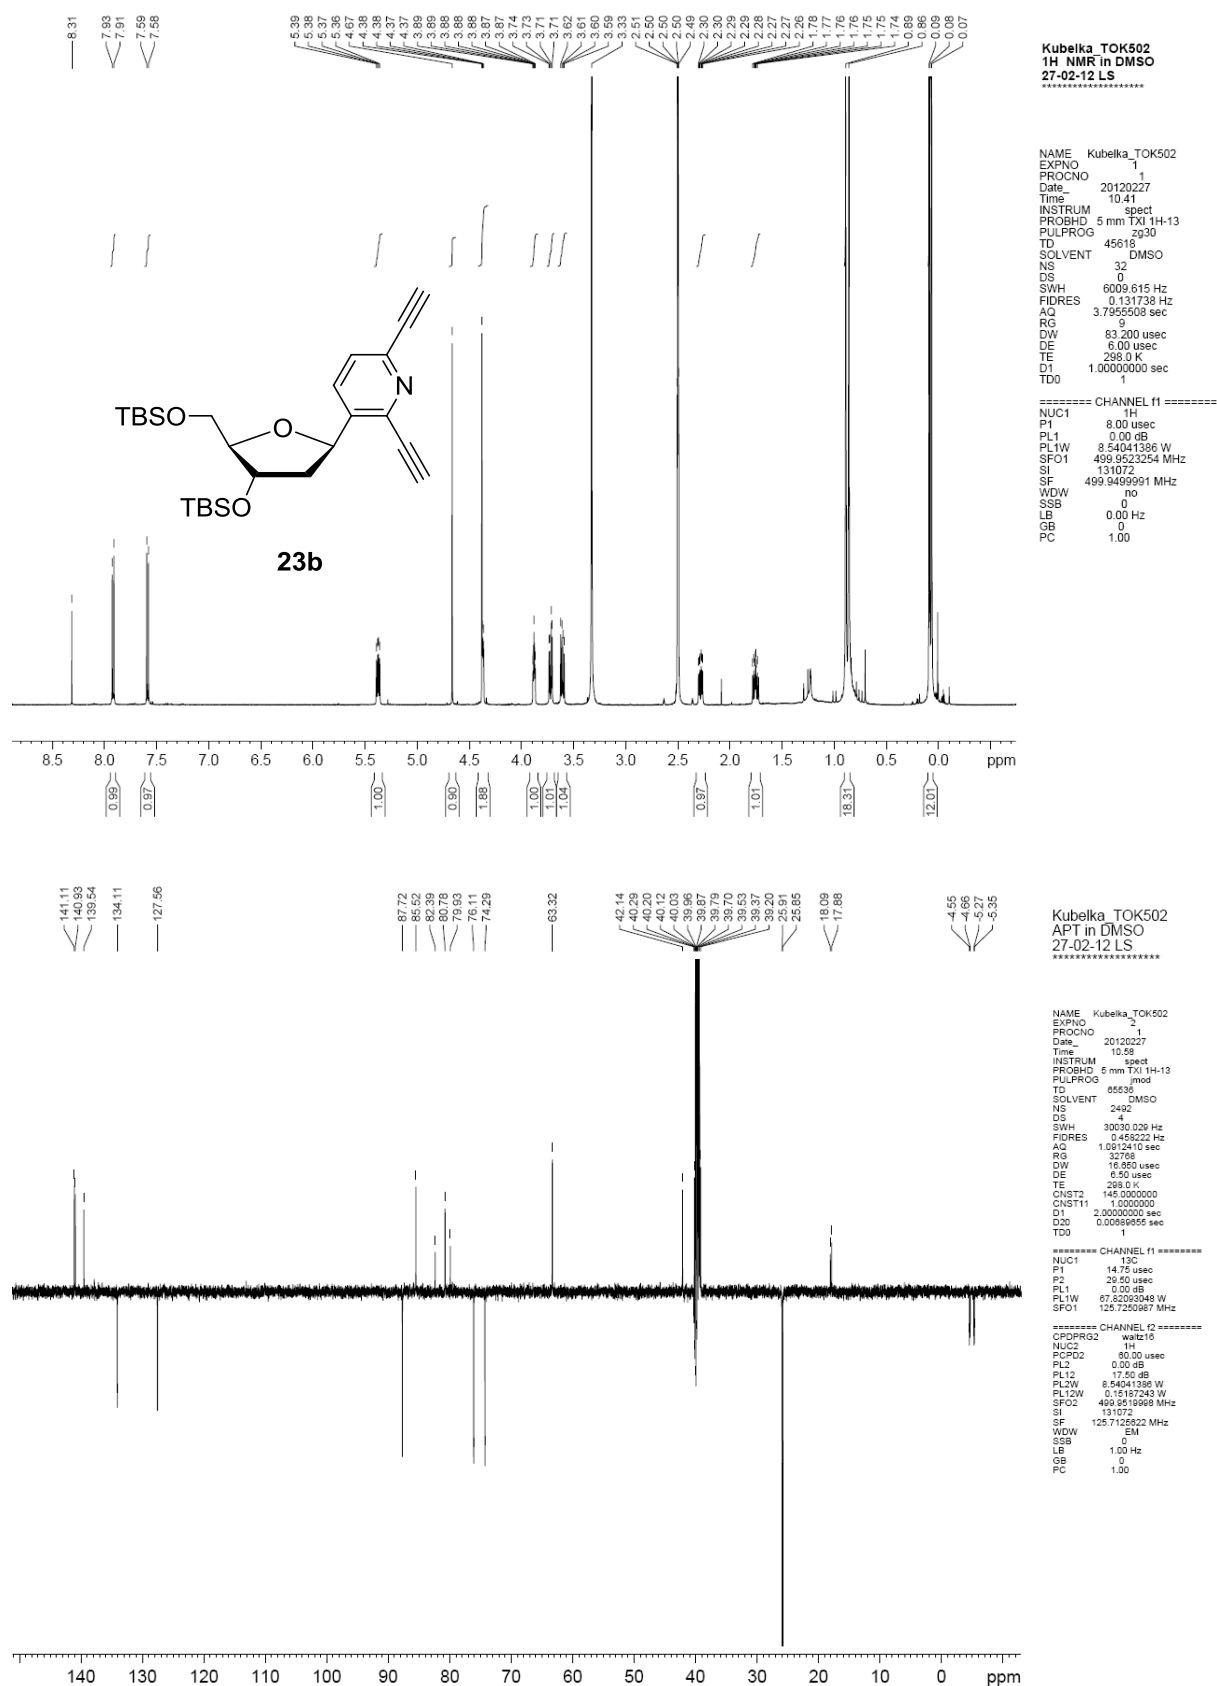

NMR Spectra of **23c**

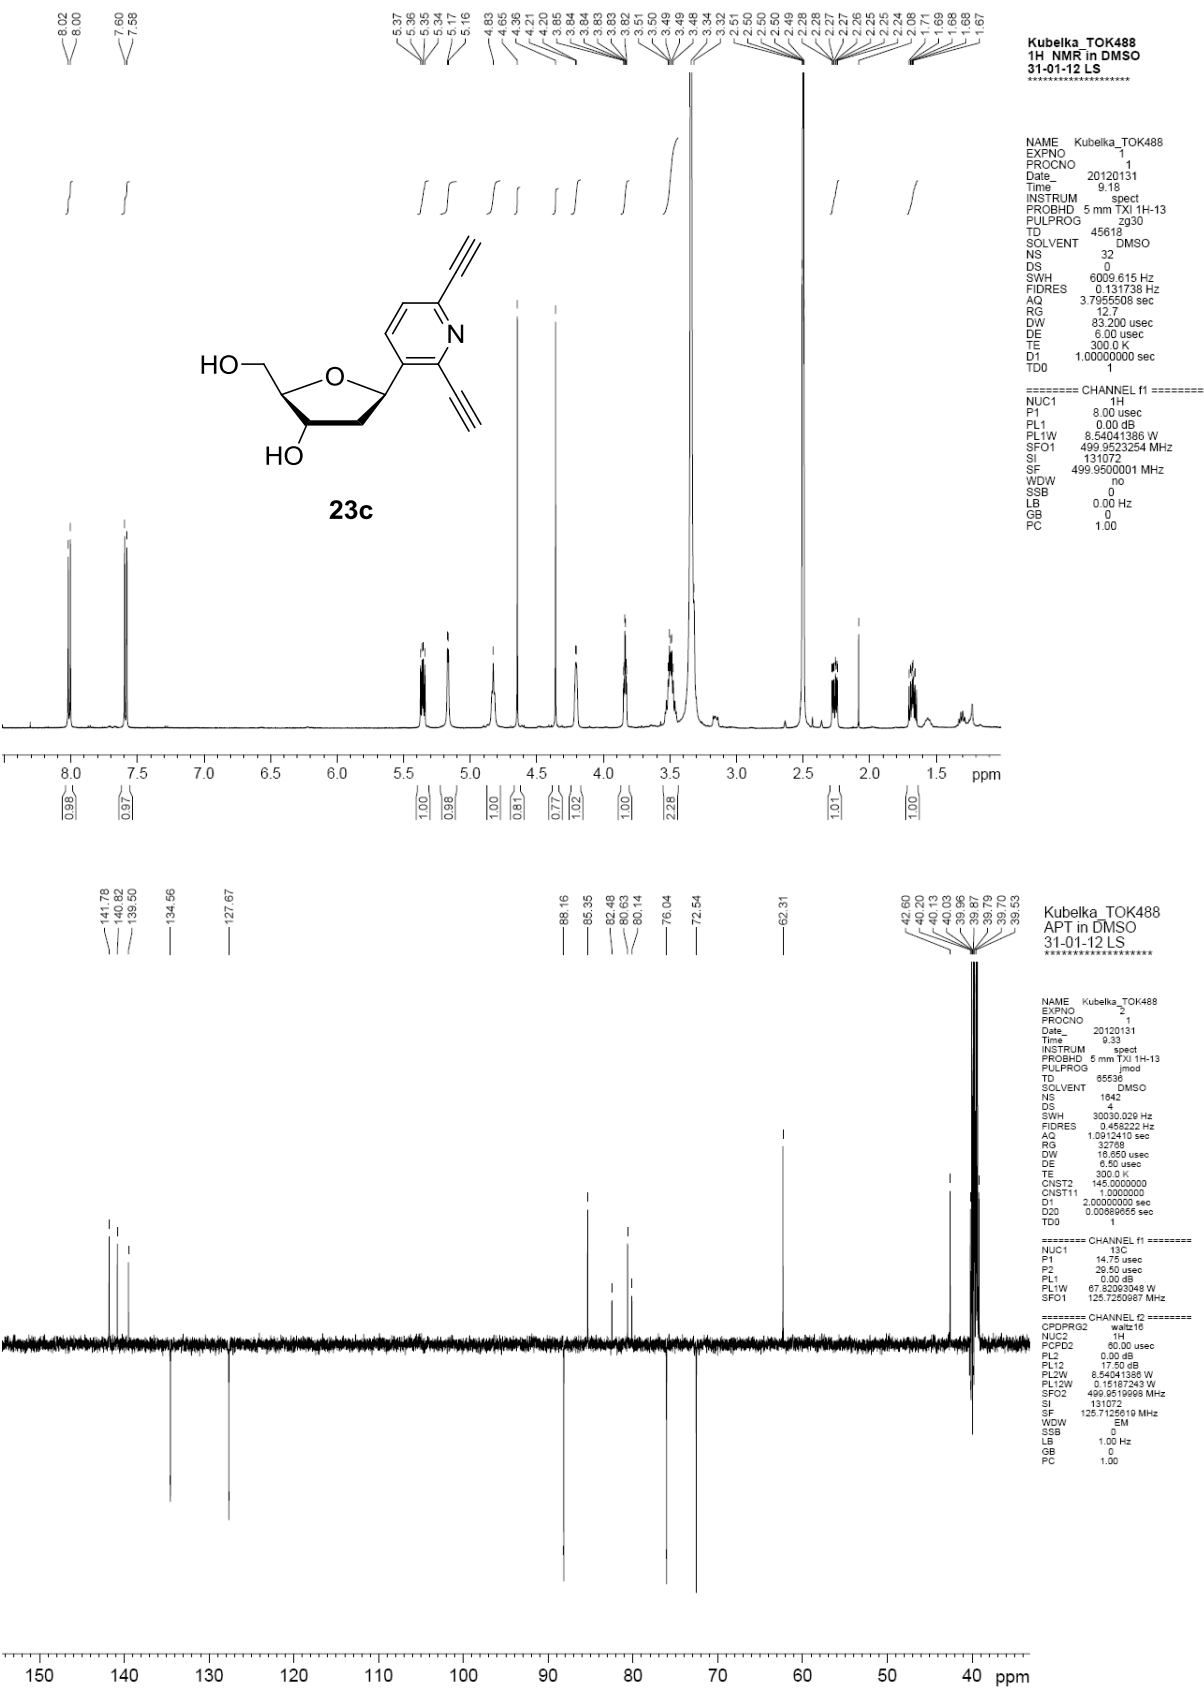

NMR Spectra of **24a**

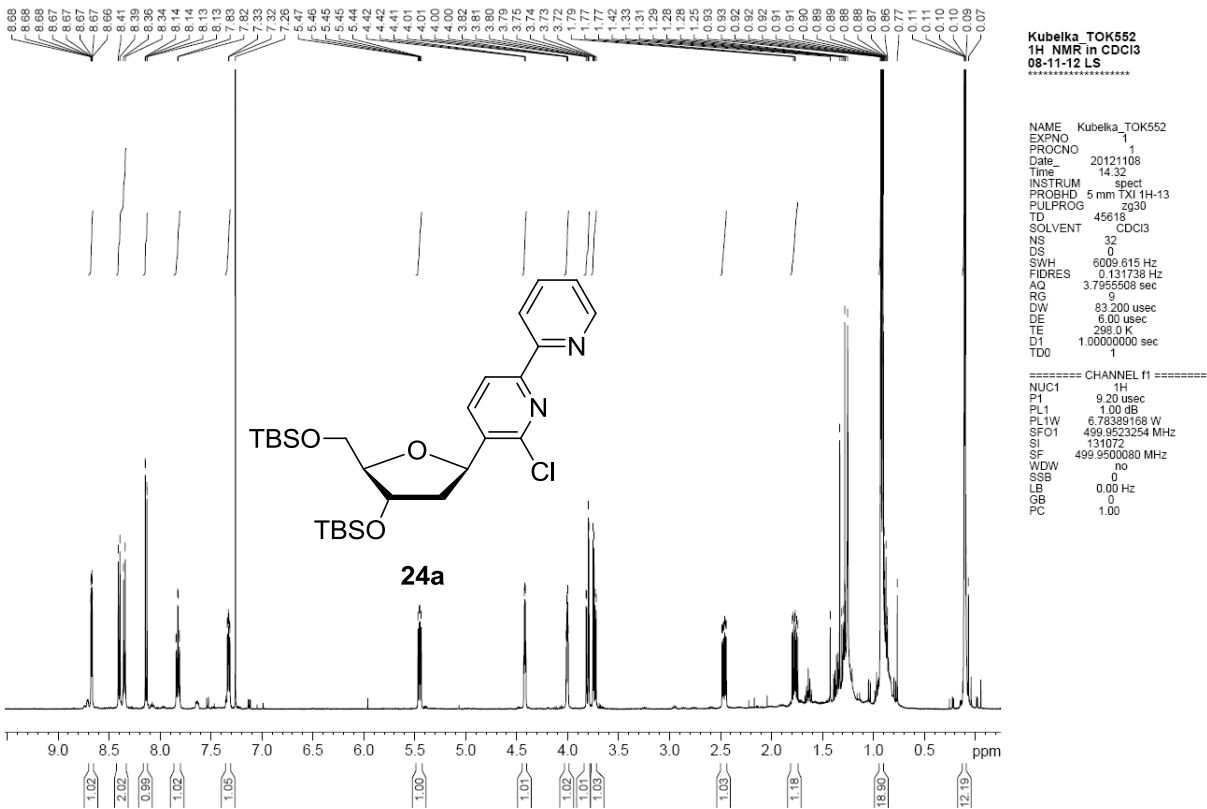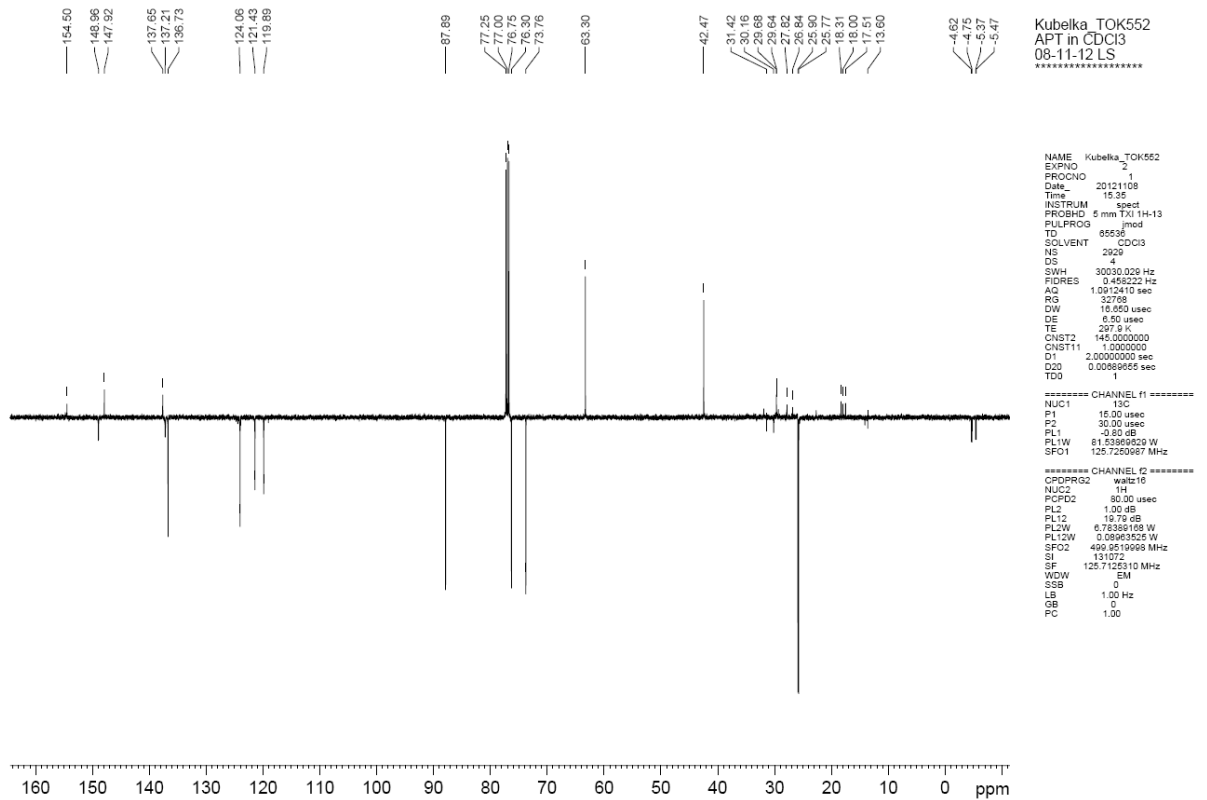

NMR Spectra of **24b**

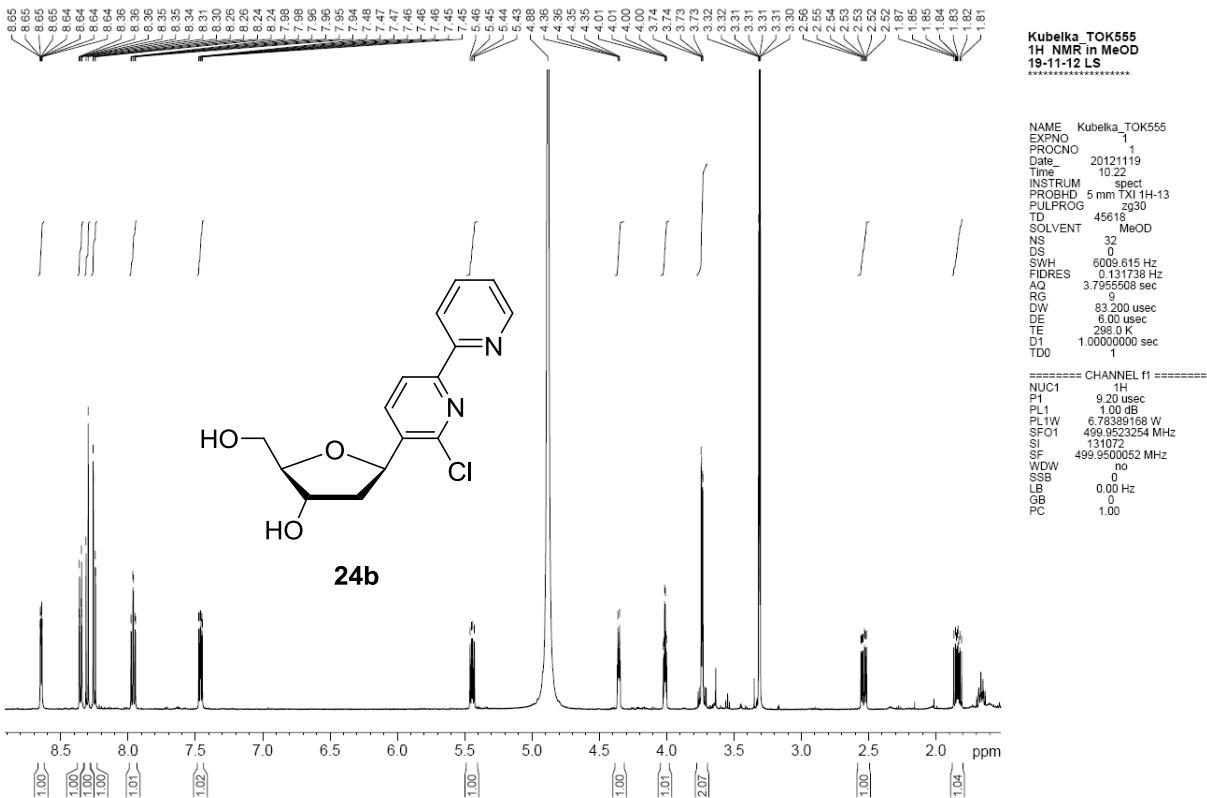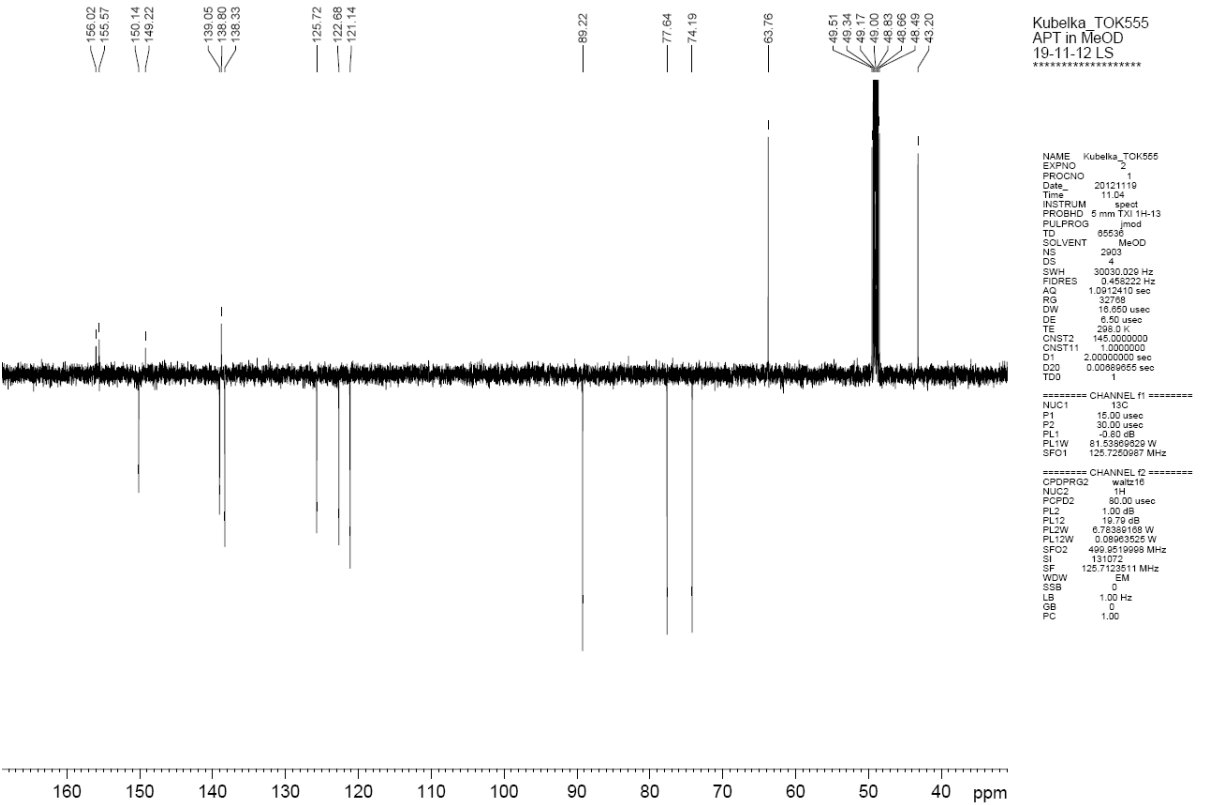





NMR Spectra of **25b**

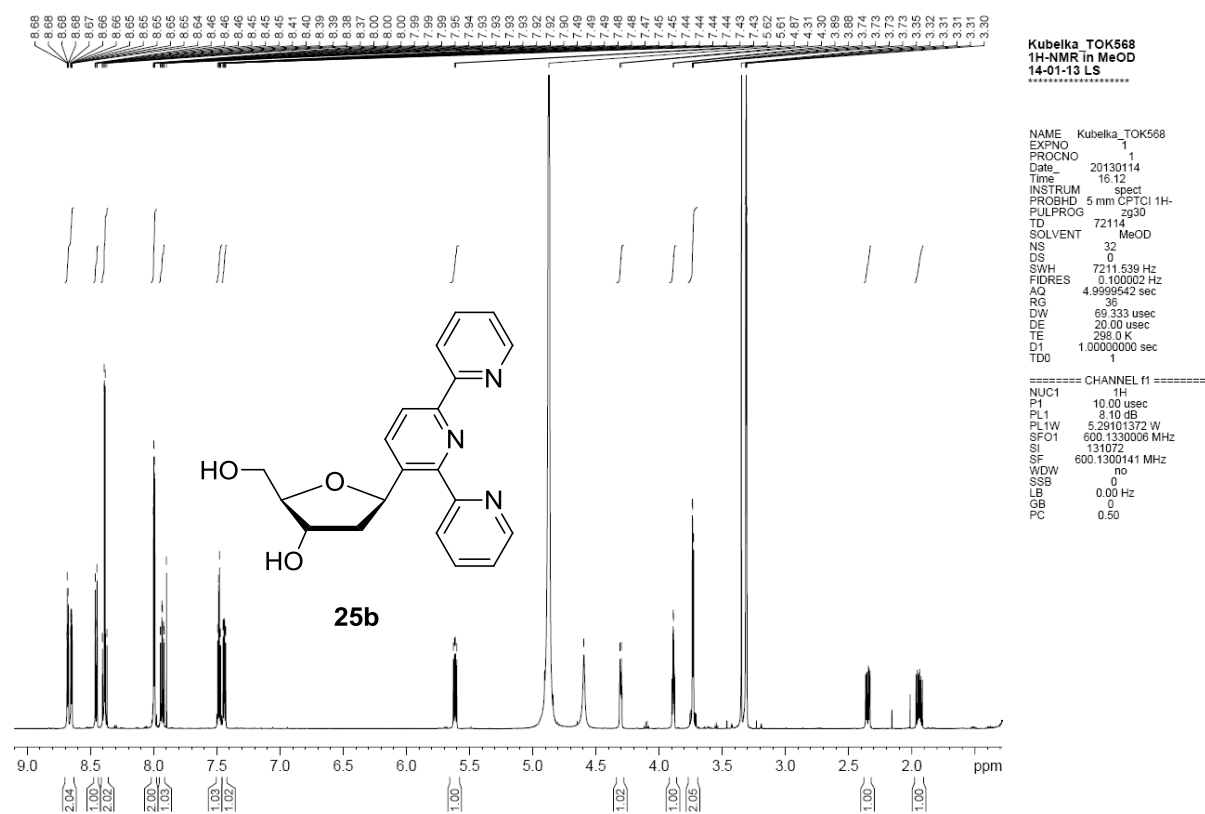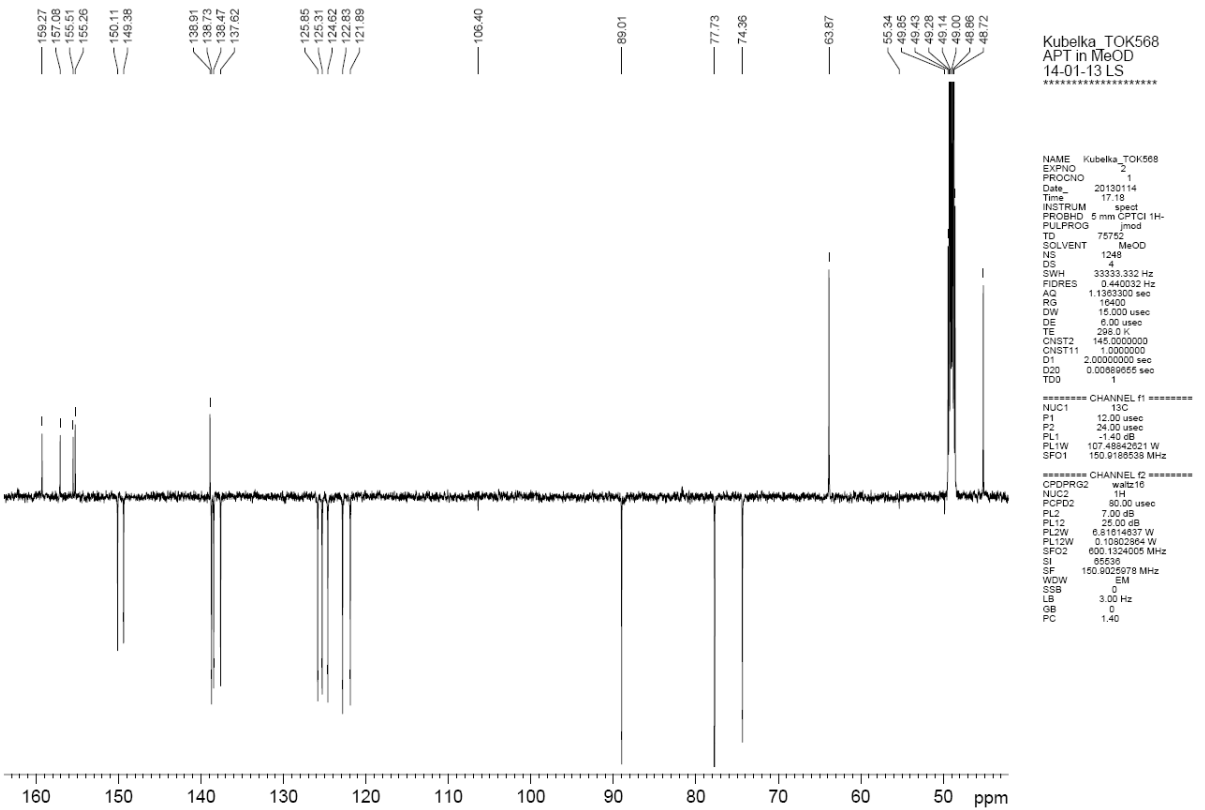



NMR Spectra of **26b**

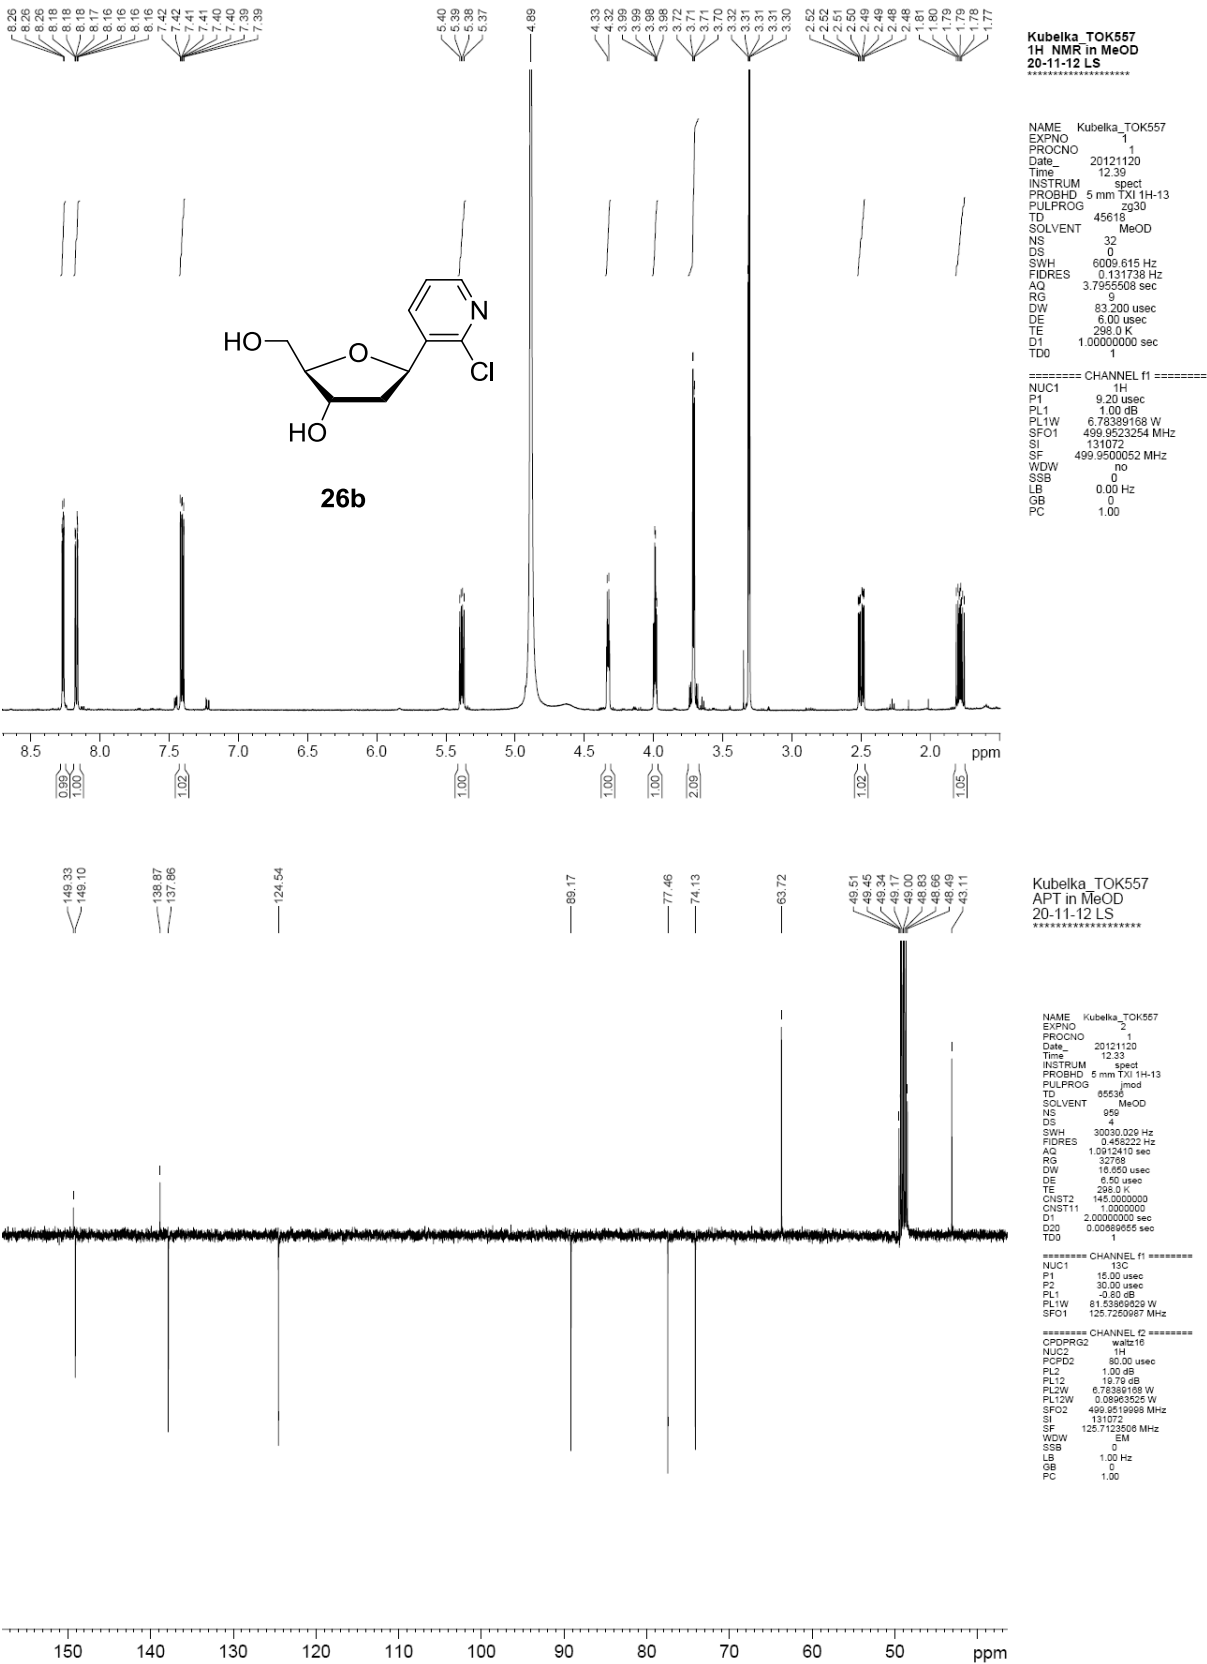

Supplement: c3ob40774h.pdf [file c3ob40774h.pdf]
